# Supplementary material for: Novel Approaches for the Solid-Phase Synthesis of Dihydroquinazoline-2(1H)-One Derivatives and Biological Evaluation as Potential Anticancer Agents
Source: MDPI journal article supplement (doi:10.3390/molecules27238577), 2022-12-05

Supporting Information

**Novel Approaches for the Solid-Phase Synthesis of Dihydroquinazoline-2(1H)-one Derivatives and Biological Evaluation as Potential Anticancer Agents**

Qiong Wang<sup>1,4</sup>, Ying Pan<sup>1</sup>, Hongjun Luo<sup>2</sup>, Yanmei Zhang<sup>3</sup>, Fenfei Gao<sup>3</sup>, Jinzhi Wang<sup>1,\*</sup>, Jinhong Zheng<sup>1,\*</sup>

*1 Department of Chemistry, Shantou University Medical College, 22 Xinling Road, Shantou 515041, PR China*

*2 Department of Bio-analytical, Shantou University Medical College, 22 Xinling Road, Shantou 515041, PR China*

*3 Department of Pharmacology, Shantou University Medical College, Shantou 515041, PR China*

*4 National Cancer Center/National Clinical Research Center for Cancer/Cancer Hospital & Shenzhen Hospital, Chinese Academy of Medical Sciences and Peking Union Medical College, Shenzhen, 518116, PR China*

\*Corresponding author:

Jinzhi Wang, Ph.D.

Department of Chemistry, Shantou University Medical College, 22 Xinling Road, Shantou 515041, PR China, Email: jzhwang@stu.edu.cn

Jinhong Zheng, Ph.D.

Department of Chemistry, Shantou University Medical College, 22 Xinling Road, Shantou 515041, PR China, Email: jhzheng@stu.edu.cn

## Table of Contents

|                                                             |    |
|-------------------------------------------------------------|----|
| Analytical data of synthetic compounds .....                | 3  |
| $^1\text{H}$ NMR and $^{13}\text{C}$ NMR Spectrometry ..... | 14 |
| LC/MS Spectrometry .....                                    | 35 |

## Analytical data of synthetic compounds

### *N*-Fmoc-3-amino-3-(2-fluoro-5-nitrophenyl)propionic acid 3':

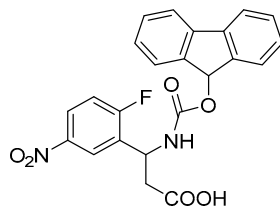

White solid; yield: 68.2%; mp 200.8-201.2°C;  $^1\text{H}$  NMR (600 MHz, DMSO)  $\delta$  8.36 (dd,  $J = 6.1, 2.8$  Hz, 1H), 8.22 (dd,  $J = 8.7, 3.9$  Hz, 2H), 7.87 (t,  $J = 7.2$  Hz, 2H), 7.65 (dd,  $J = 15.3, 7.5$  Hz, 2H), 7.49 (t,  $J = 9.1$  Hz, 1H), 7.39 (dt,  $J = 11.9, 7.5$  Hz, 2H), 7.27 (dt,  $J = 7.2, 3.6$  Hz, 2H), 5.27 (td,  $J = 8.6, 6.1$  Hz, 1H), 4.34 – 4.28 (m, 2H), 4.20 (t,  $J = 6.8$  Hz, 1H), 2.74 (ddd,  $J = 22.1, 16.2, 7.5$  Hz, 2H);  $^{13}\text{C}$  NMR (151 MHz, DMSO)  $\delta$  171.60, 164.11, 162.41(C-F, d,  $^1J_{\text{C-F}} = 255.86$  Hz), 155.75, 144.63, 144.30, 143.98, 141.19, 141.16, 132.24, 132.13(C-F, d,  $^2J_{\text{C-F}} = 16.5$  Hz), 128.12, 128.06 (C-F, d,  $^3J_{\text{C-F}} = 8.68$  Hz), 127.48, 127.45, 125.71, 125.64 (C-F, d,  $^3J_{\text{C-F}} = 10.61$  Hz), 125.54, 125.52, 124.36, 124.32, 120.63, 120.57, 117.61, 117.44(C-F, d,  $^2J_{\text{C-F}} = 24.60$  Hz), 65.94, 47.09, 45.6; MS (ESI) ( $m/z$ ): 450.12,  $[\text{M}+\text{H}^+]$ : 451.10.

### 3-{4-{2-[(1-amino-3-hydroxy-1-oxopropan-2-yl)amino]-2-oxoethyl}-6-nitro-2-oxo-3,4-dihydroquinazolin-1(2H)-yl}propan-1-aminium 2,2,2-trifluoroacetate (CA1-6)·TFA:

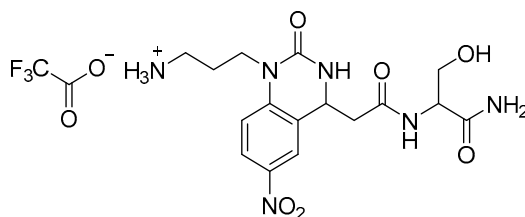

Yellow solid; yield 93%;  $^1\text{H}$  NMR (600 MHz, DMSO)  $\delta$  8.15 – 8.10 (m, 1H), 8.07 (dd,  $J = 25.3, 2.5$  Hz, 1H), 7.96 (d,  $J = 8.0$  Hz, 1H), 7.86 (s, 3H), 7.52 (dd,  $J = 53.4, 2.7$  Hz, 1H), 7.34 – 7.19 (m, 2H), 7.08 (d,  $J = 9.3$  Hz, 1H), 4.89 (dtd,  $J = 25.9, 6.5, 2.8$  Hz, 1H), 4.19 (td,  $J = 10.0, 5.1$  Hz, 1H), 3.97 – 3.90 (m, 2H), 3.56 – 3.39 (m, 2H), 2.90 (d,  $J = 5.8$  Hz, 2H), 2.70 – 2.53 (m, 2H), 1.97 – 1.75 (m, 2H);  $^{13}\text{C}$  NMR (151 MHz, DMSO)  $\delta$  172.39 (d,  $J = 6.2$  Hz), 169.27, 158.74 (C-F, q,  $^2J_{\text{C-F}} = 31.6$  Hz), 153.15, 143.77, 141.54, 124.69, 124.22, 122.70, 117.46 (C-F, q,  $^1J_{\text{C-F}} = 299.3$  Hz), 114.01, 62.08, 55.25, 50.07, 44.45, 37.07, 25.46; MS (ESI) ( $m/z$ ): 394. 16,  $[\text{M}+\text{H}^+]$ :

395.15.

**4-{2-[(1-amino-3-hydroxy-1-oxopropan-2-yl)amino]-2-oxoethyl}-1-(3-ammoniopropyl)-2-oxo-1,2,3,4-tetrahydroquinazolin-6-aminium 2,2,2-trifluoroacetate (CA1-7)·TFA:**

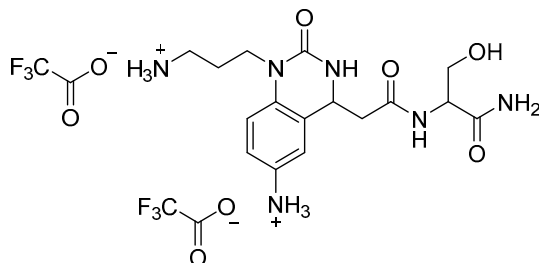

Brown solid; yield 76%;  $^1\text{H}$  NMR (600 MHz, DMSO)  $\delta$  7.99 (dd,  $J$  = 20.8, 7.9 Hz, 1H), 7.88 (s, 1H), 7.33 (d,  $J$  = 14.9 Hz, 1H), 7.13 (ddd,  $J$  = 30.6, 18.0, 5.7 Hz, 2H), 7.05 (d,  $J$  = 1.8 Hz, 1H), 4.76 (dtd,  $J$  = 19.5, 6.6, 2.7 Hz, 1H), 4.23 (dd,  $J$  = 12.3, 5.5 Hz, 1H), 3.93 – 3.74 (m, 1H), 3.56 (dddd,  $J$  = 31.8, 26.5, 10.2, 5.4 Hz, 1H), 2.94 – 2.83 (m, 1H), 2.55 (td,  $J$  = 14.8, 7.5 Hz, 1H), 1.93 – 1.75 (m, 1H);  $^{13}\text{C}$  NMR (151 MHz, DMSO)  $\delta$  172.52, 169.60, 159.08, 158.86 (C-F, q,  $^2J_{\text{C-F}}$  = 32.4 Hz), 154.02, 135.78, 125.03, 121.84, 120.15, 119.92, 118.23, 116.25 (C-F, q,  $^1J_{\text{C-F}}$  = 299.3 Hz), 114.55, 62.02, 55.46, 50.23, 44.42, 39.05, 37.13, 25.48; MS (ESI) ( $m/z$ ): 364.19,  $[\text{M}+\text{H}^+]$ : 365.20.

**3-{4-{2-[(1-amino-3-hydroxy-1-oxopropan-2-yl)amino]-2-oxoethyl}-6-(isonicotinamido)-2-oxo-3,4-dihydroquinazolin-1(2H)-yl}propan-1-aminium 2,2,2-trifluoroacetate (CA1-a)·TFA:**

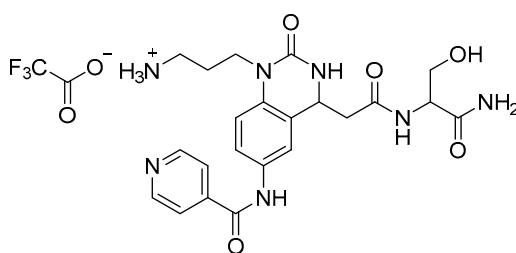

Orange solid; yield 86%;  $^1\text{H}$  NMR (600 MHz, DMSO)  $\delta$  10.53 (d,  $J$  = 19.5 Hz, 1H), 8.85 (s, 2H), 8.06 – 7.93 (m, 3H), 7.79 (s, 3H), 7.68 (ddd,  $J$  = 18.6, 8.8, 2.3 Hz, 1H), 7.62 (s, 1H), 7.32 (d,  $J$  = 14.5 Hz, 1H), 7.18 – 7.11 (m, 1H), 7.11 – 7.00 (m, 2H), 4.80 (dd,  $J$  = 9.3, 3.8 Hz, 1H), 4.26 (dt,  $J$  = 7.8, 5.4 Hz, 1H), 3.94 – 3.84 (m, 2H), 3.54 (ddd,  $J$  = 15.9, 10.9, 5.5 Hz, 2H), 2.89 (dd,  $J$  = 12.5, 6.2 Hz, 2H), 2.73 – 2.52 (m, 2H), 1.88 (ddt,  $J$  = 19.1, 13.6, 6.7 Hz, 2H);  $^{13}\text{C}$  NMR (151 MHz, DMSO)  $\delta$  172.58, 169.80, 163.55, 158.94 (C-F, q,  $^2J_{\text{C-F}}$  = 32.4 Hz), 154.15, 149.58, 143.49,



**3-{4-[2-[(1-amino-3-hydroxy-1-oxopropan-2-yl)amino]-2-oxoethyl]-6-benzamido-2-oxo-3,4-dihydroquinazolin-1(2H)-yl}propan-1-aminium 2,2,2-trifluoroacetate (CA1-b)·TFA:**

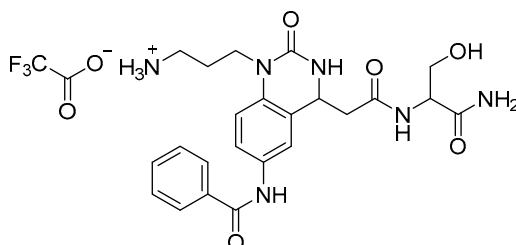

**3-{4-[2-[(1-amino-3-hydroxy-1-oxopropan-2-yl)amino]-2-oxoethyl]-6-(4-methylbenzamide)-2-oxo-3,4-dihydroquinazolin-1(2H)-yl}propan-1-aminium 2,2,2-trifluoroacetate (CA1-c)·TFA:**

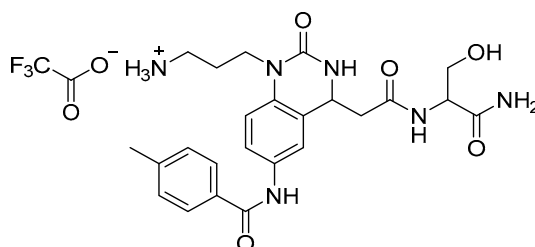

5

5.5 Hz, 2H), 2.88 (dd,  $J = 12.6, 6.3$  Hz, 2H), 2.63 – 2.52 (m, 2H), 2.39 (s, 3H), 1.93 – 1.83 (m, 2H);  $^{13}\text{C}$  NMR (151 MHz, DMSO)  $\delta$  172.56, 169.88, 169.73 (C-F, q,  $^2J_{\text{C-F}} = 22.39$  Hz), 165.43, 154.17, 142.01, 133.98, 133.41, 132.40, 132.34, 129.40, 128.05, 120.81, 119.00 (C-F, q,  $^1J_{\text{C-F}} = 279.55$  Hz), 118.32, 113.66, 62.09, 55.49, 50.67, 44.70, 38.82, 37.22, 25.67, 21.47; MS (ESI) (m/z): 482.23,  $[\text{M}+\text{H}^+]$ : 483.20.

**3-{4-{2-[(1-amino-3-hydroxy-1-oxopropan-2-yl)amino]-2-oxoethyl}-6-(4-fluorobenzamido)-2-oxo-3,4-dihydroquinazolin-1(2H)-yl}propan-1-aminium 2,2,2-trifluoroacetate (CA1-d)·TFA:**

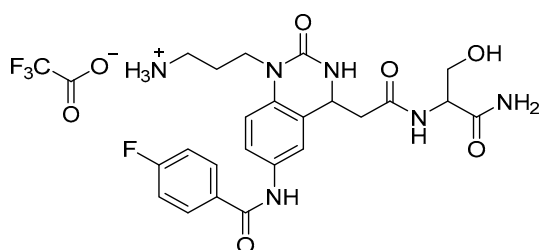

Yellow solid; yield 79%;  $^1\text{H}$  NMR (600 MHz, DMSO)  $\delta$  10.20 (d,  $J = 16.2$  Hz, 1H), 8.11 – 7.89 (m, 3H), 7.73 (s, 3H), 7.66 (ddd,  $J = 17.0, 8.9, 2.2$  Hz, 1H), 7.61 (s, 1H), 7.43 – 7.35 (m, 2H), 7.32 (d,  $J = 25.3$  Hz, 1H), 7.10 (d,  $J = 13.3$  Hz, 1H), 7.08 – 6.96 (m, 2H), 4.83 – 4.71 (m, 1H), 4.29 – 4.22 (m, 1H), 3.95 – 3.83 (m, 2H), 2.89 (dd,  $J = 12.5, 6.3$  Hz, 2H), 2.64 – 2.52 (m, 2H), 1.88 (ddd,  $J = 21.5, 10.8, 5.5$  Hz, 2H);  $^{13}\text{C}$  NMR (151 MHz, DMSO)  $\delta$  172.57, 169.77, 164.55, 163.69 (C-F, q,  $^1J_{\text{C-F}} = 249.32$  Hz), 158.38 (C-F, q,  $^2J_{\text{C-F}} = 31.83$  Hz), 154.15, 133.78, 133.56, 131.69, 130.75, 123.95, 120.83, 119.02 (C-F, q,  $^1J_{\text{C-F}} = 274.60$  Hz), 115.88, 115.74, 113.70, 62.10, 55.49, 50.66, 44.65, 38.84, 37.19, 25.66; MS (ESI) (m/z): 486.20,  $[\text{M}+\text{H}^+]$ : 487.20.

**3-{4-{2-[(1-amino-3-hydroxy-1-oxopropan-2-yl)amino]-2-oxoethyl}-6-(nicotinamido)-2-oxo-3,4-dihydroquinazolin-1(2H)-yl}propan-1-aminium 2,2,2-trifluoroacetate (CA1-e)·TFA:**

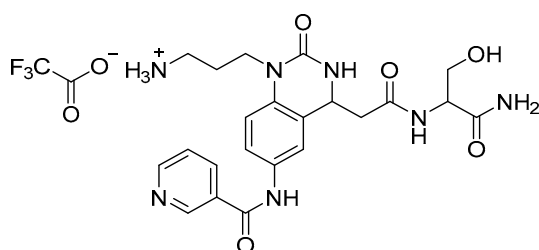

Yellow solid; yield 84%;  $^1\text{H}$  NMR (600 MHz, DMSO)  $\delta$  10.45 (d,  $J$  = 15.6 Hz, 1H), 9.15 (d,  $J$  = 8.4 Hz, 1H), 8.80 (d,  $J$  = 4.6 Hz, 1H), 8.38 (ddd,  $J$  = 9.7, 8.0, 4.0 Hz, 1H), 7.99 (dd,  $J$  = 39.8, 7.9 Hz, 1H), 7.79 (s, 3H), 7.67 (dd,  $J$  = 11.7, 3.1 Hz, 1H), 7.65 – 7.63 (m, 1H), 7.62 (dd,  $J$  = 6.4, 2.2 Hz, 1H), 7.31 (s, 1H), 7.10 (dd,  $J$  = 12.0, 9.7 Hz, 2H), 7.07 – 6.99 (m, 1H), 4.80 – 4.74 (m, 1H), 4.27 – 4.25 (m, 1H), 3.93 – 3.82 (m, 2H), 3.62 – 3.48 (m, 2H), 2.89 (dd,  $J$  = 12.6, 6.3 Hz, 2H), 2.64 – 2.52 (m, 2H), 1.94 – 1.83 (m, 2H);  $^{13}\text{C}$  NMR (151 MHz, DMSO)  $\delta$  172.58, 169.75, 163.82, 158.67 (C-F, q,  $^2J_{\text{C-F}}$  = 35.9 Hz), 154.17, 151.69, 148.35, 136.83, 133.83, 133.47, 131.23, 124.40, 124.02, 120.84, 119.02, 117.32, 115.38 (C-F, q,  $^1J_{\text{C-F}}$  = 283.7 Hz), 113.77, 62.06, 55.47, 50.65, 44.65, 38.88, 37.20, 25.66; MS (ESI) ( $m/z$ ): 469.21,  $[\text{M}+\text{H}^+]$ : 470.20.

**3-{4-{2-[(1-amino-3-hydroxy-1-oxopropan-2-yl)amino]-2-oxoethyl}-2-oxo-6-(picolinamido)-3,4-dihydroquinazolin-1(2H)-yl}propan-1-aminium 2,2,2-trifluoroacetate (CA1-f)·TFA:**

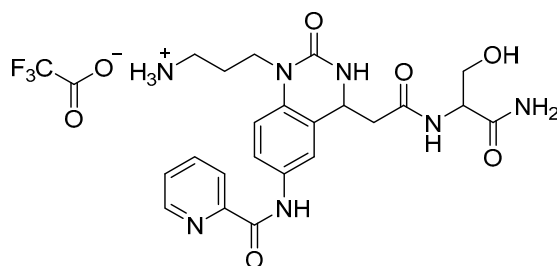

Orange solid; yield 76%;  $^1\text{H}$  NMR (600 MHz, DMSO)  $\delta$  10.67 – 10.53 (m, 1H), 8.79 – 8.69 (m, 1H), 8.15 (d,  $J$  = 7.8 Hz, 1H), 8.07 (t,  $J$  = 7.7 Hz, 1H), 7.99 (dd,  $J$  = 17.4, 7.9 Hz, 1H), 7.78 (dd,  $J$  = 7.1, 4.4 Hz, 5H), 7.68 (dd,  $J$  = 6.6, 4.9 Hz, 1H), 7.29 (s, 1H), 7.08 (d,  $J$  = 7.3 Hz, 1H), 7.01 (dd,  $J$  = 52.7, 2.0 Hz, 2H), 4.84 – 4.74 (m, 1H), 4.33 – 4.20 (m, 1H), 3.97 – 3.80 (m, 2H), 3.65 – 3.49 (m, 2H), 2.89 (dt,  $J$  = 12.7, 6.3 Hz, 2H), 2.65 – 2.51 (m, 2H), 1.97 – 1.78 (m, 2H);  $^{13}\text{C}$  NMR (151 MHz, DMSO)  $\delta$  172.54, 169.82, 162.62, 158.88 (C-F, q,  $^2J_{\text{C-F}}$  = 34.93 Hz), 154.11, 150.32, 148.88, 138.61, 133.77, 133.07, 127.33, 123.94, 122.71, 120.74, 118.90, 117.17 (C-F, q,  $^1J_{\text{C-F}}$  = 71.71 Hz), 113.78, 62.08, 55.48, 50.68 (d,  $J$  = 12.5 Hz), 44.58, 38.88, 37.20, 25.66; MS (ESI) ( $m/z$ ): 469.21,  $[\text{M}+\text{H}^+]$ : 470.15.

**3-{4-{2-[(1-amino-3-hydroxy-1-oxopropan-2-yl)amino]-2-oxoethyl}-2-oxo-6-(2-phenox yacetamido)-3,4-dihydroquinazolin-1(2H)-yl}propan-1-aminium 2,2,2-trifluoroacetate (CA1-g)·TFA:**

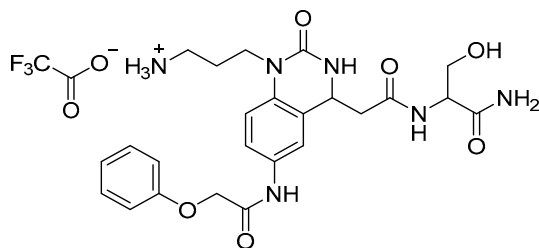

White solid; yield 85%;  $^1\text{H}$  NMR (600 MHz, DMSO)  $\delta$  10.03 (d,  $J$  = 14.1 Hz, 1H), 7.98 (dd,  $J$  = 37.5, 7.9 Hz, 1H), 7.77 (s, 3H), 7.58 – 7.51 (m, 1H), 7.4 (dd,  $J$  = 14.2, 2.0 Hz, 1H), 7.32 (t,  $J$  = 7.8 Hz, 2H), 7.30 (d,  $J$  = 3.8 Hz, 1H), 7.10 (s, 1H), 7.07 – 6.95 (m, 5H), 4.87 (d,  $J$  = 34.2 Hz, 1H), 4.78 – 4.69 (m, 1H), 4.60 (d,  $J$  = 4.2 Hz, 2H), 4.24 (dq,  $J$  = 10.4, 5.2 Hz, 1H), 3.93 – 3.79 (m, 2H), 3.55 (d,  $J$  = 42.7 Hz, 2H), 2.87 (d,  $J$  = 5.4 Hz, 2H), 2.62 – 2.51 (m, 2H), 1.86 (dq,  $J$  = 12.8, 6.9 Hz, 2H);  $^{13}\text{C}$  NMR (151 MHz, DMSO)  $\delta$  172.63, 172.54, 169.73, 163.55, 158.83 (C-F, q,  $^2J_{\text{C-F}}$  = 30.59 Hz), 154.12, 149.83, 149.58, 143.49, 134.05, 133.18, 124.04, 122.58, 120.97, 119.13, 115.48 (C-F, q,  $^1J_{\text{C-F}}$  = 255.65 Hz), 113.79, 62.07, 55.48, 51.80, 50.63, 44.73, 38.92, 37.19, 25.65; MS (ESI) ( $m/z$ ): 498.22,  $[\text{M}+\text{H}^+]$ : 499.20.

**3-{4-{2-[(1-amino-3-hydroxy-1-oxopropan-2-yl)amino]-2-oxoethyl}-2-oxo-6-[3-(pyridin-3-yl)propanamido]-3,4-dihydroquinazolin-1(2H)-yl}propan-1-aminium 2,2,2-trifluoroacetate (CA1-h)·TFA:**

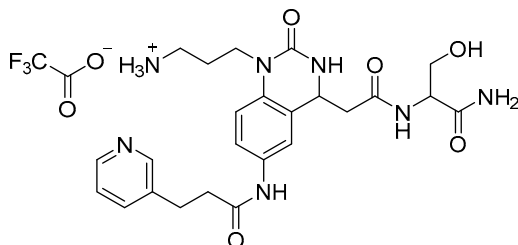

Yellow solid; yield 92%;  $^1\text{H}$  NMR (600 MHz, DMSO)  $\delta$  9.96 (d,  $J$  = 15.4 Hz, 1H), 8.78 (s, 1H), 8.70 (s, 1H), 8.27 (d,  $J$  = 7.6 Hz, 1H), 7.98 (dd,  $J$  = 38.9, 7.9 Hz, 1H), 7.85 (s, 3H), 7.83 – 7.80 (m, 1H), 7.42 (s, 1H), 7.40 (dd,  $J$  = 5.0, 2.6 Hz, 1H), 7.30 (d,  $J$  = 6.5 Hz, 1H), 7.11 (d,  $J$  = 7.3 Hz, 1H), 7.06 – 6.92 (m, 2H), 4.83 – 4.65 (m, 1H), 4.24 (dtd,  $J$  = 7.8, 5.3, 2.4 Hz, 1H), 3.89 – 3.79 (m, 2H), 3.64 – 3.44 (m, 2H), 3.06 (t,  $J$  = 7.1 Hz, 2H), 2.87 (dd,  $J$  = 12.3, 6.2 Hz, 2H), 2.74 (d,  $J$  = 7.2 Hz, 2H), 2.65 – 2.51 (m, 2H), 1.93 – 1.78 (m, 2H);  $^{13}\text{C}$  NMR (151 MHz, DMSO)  $\delta$  172.55, 169.86, 169.68, 159.02, 158.80 (C-F, q,  $^2J_{\text{C-F}}$  = 33.5 Hz), 154.18, 144.44, 143.33, 142.52, 140.36, 133.79, 133.09, 130.88, 126.24, 124.05, 119.56, 118.02, 117.71, 116.06 (C-F, q,  $^1J_{\text{C-F}}$  =

294.9 Hz), 113.78, 62.06, 55.47, 50.58, 44.56, 38.84, 37.14, 36.86, 28.04, 25.63; MS (ESI) (m/z): 497.24, [M+H<sup>+</sup>]: 498.25.

**3-{4-{2-[(1-amino-3-hydroxy-1-oxopropan-2-yl)amino]-2-oxoethyl}-2-oxo-6-[2-(thiophen-2-yl)acetamido]-3,4-dihydroquinazolin-1(2H)-yl}propan-1-aminium 2,2,2-trifluoroacetate (CA1-i)·TFA:**

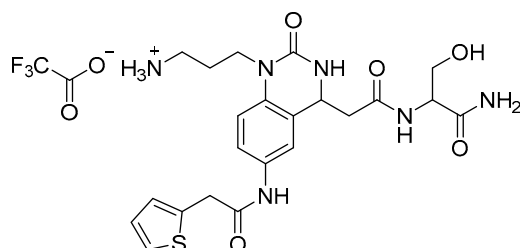

Pale brown solid; yield 90%; <sup>1</sup>H NMR (600 MHz, DMSO) δ 10.18 (d, *J* = 15.2 Hz, 1H), 7.99 (dd, *J* = 38.4, 7.9 Hz, 1H), 7.8 (s, 3H), 7.45 (dd, *J* = 23.6, 5.1 Hz, 2H), 7.41 – 7.35 (m, 1H), 7.30 (d, *J* = 4.2 Hz, 1H), 7.10 (d, *J* = 9.6 Hz, 1H), 7.08 – 6.90 (m, 4H), 4.77 – 4.67 (m, 1H), 4.28 – 4.21 (m, 1H), 3.86 (t, *J* = 9.1 Hz, 4H), 3.61 – 3.48 (m, 2H), 2.93 – 2.82 (m, 2H), 2.62 – 2.51 (m, 2H), 1.86 (ddd, *J* = 22.5, 10.5, 4.8 Hz, 2H); <sup>13</sup>C NMR (151 MHz, DMSO) δ 172.56, 169.79, 168.19, 158.70 (C-F, q, <sup>2</sup>*J*<sub>C-F</sub> = 32.3 Hz), 154.15, 137.64, 133.80, 133.27, 129.82, 127.11, 126.77, 125.49, 124.12, 119.62, 117.82, 115.69 (C-F, q, <sup>1</sup>*J*<sub>C-F</sub> = 321.4 Hz), 113.82, 62.06, 55.46, 50.57, 44.53, 38.83, 37.86, 37.16, 25.63; MS (ESI) (m/z): 488.18, [M+H<sup>+</sup>]: 489.20.

**3-{4-{2-[(1-amino-3-hydroxy-1-oxopropan-2-yl)amino]-2-oxoethyl}-6-[(2-methoxyphenyl)sulfonamido]-2-oxo-3,4-dihydroquinazolin-1(2H)-yl}propan-1-aminium 2,2,2-trifluoroacetate (CA1-j)·TFA:**

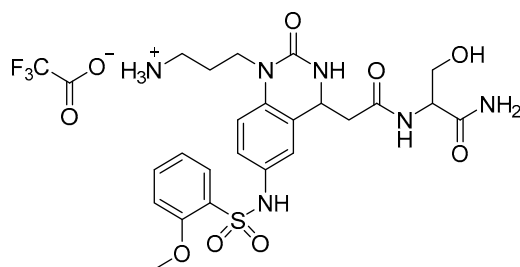

Yellow solid; yield 71%; <sup>1</sup>H NMR (600 MHz, DMSO) δ 9.73 (d, *J* = 35.7 Hz, 1H), 7.96 (dd, *J* = 10.1, 8.1 Hz, 1H), 7.75 (s, 3H), 7.72 – 7.68 (m, 1H), 7.59 – 7.54 (m, 1H), 7.33 (d, *J* = 24.0 Hz, 1H), 7.18 (d, *J* = 8.4 Hz, 1H), 7.12 (d, *J* = 22.3 Hz, 1H), 7.02 (td, *J* = 7.5, 2.7 Hz, 1H), 6.99 – 6.90 (m, 3H), 6.87 (d, *J* = 8.1 Hz, 1H), 4.67 – 4.59 (m, 1H), 4.24 (dt, *J* = 7.7, 5.3 Hz, 1H), 3.90 (s,

3H), 3.81 – 3.71 (m, 2H), 3.63 – 3.53 (m, 2H), 2.82 (d,  $J = 6.0$  Hz, 2H), 2.41 (tt,  $J = 14.6, 7.2$  Hz, 2H), 1.78 (ddd,  $J = 19.9, 11.7, 4.8$  Hz, 2H);  $^{13}\text{C}$  NMR (151 MHz, DMSO)  $\delta$  172.53, 169.57, 158.81 (C-F, q,  $^2J_{\text{C-F}} = 33.8$  Hz), 154.15, 153.99, 135.47, 134.17, 132.17, 130.62, 126.85, 124.46, 120.98, 120.55, 119.43, 119.62, 116.85 (C-F, q,  $^1J_{\text{C-F}} = 294.6$  Hz), 113.24, 62.11, 56.56, 55.45, 50.29, 44.42, 38.88, 37.14, 25.53; MS (ESI) ( $m/z$ ): 534.19,  $[\text{M}+\text{H}^+]$ : 535.20.

**5-amino-4-{2-[1-isopentyl-2-oxo-6-[3-(pyridin-3-yl)propanamido]-1,2,3,4-tetrahydroquinazolin-4-yl]acetamido}-5-oxopentan-1-aminium 2,2,2-trifluoroacetate (CA3)·TFA:**

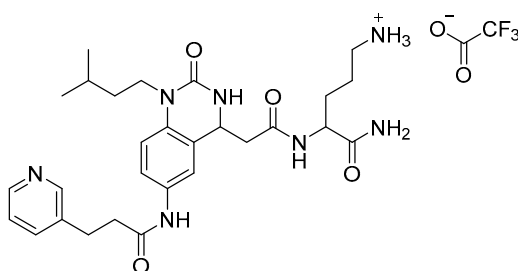

Light brown solid; yield 74%;  $^1\text{H}$  NMR (600 MHz, DMSO)  $\delta$  9.95 (d,  $J = 18.9$  Hz, 1H), 8.73 (d,  $J = 45.9$  Hz, 1H), 8.25 (dd,  $J = 12.5, 8.1$  Hz, 1H), 8.13 (dd,  $J = 34.3, 8.2$  Hz, 1H), 7.80 (dd,  $J = 13.1, 6.9$  Hz, 1H), 7.47 – 7.36 (m, 1H), 7.12 (d,  $J = 4.7$  Hz, 1H), 6.92 – 6.85 (m, 1H), 4.70 – 4.59 (m, 1H), 4.30 – 4.18 (m, 1H), 3.91 – 3.67 (m, 1H), 3.10 – 3.02 (m, 1H), 2.82 – 2.69 (m, 2H), 2.45 (ddd,  $J = 14.5, 7.7, 4.1$  Hz, 1H), 1.75 – 1.41 (m, 4H), 0.93 (d,  $J = 6.6$  Hz, 3H);  $^{13}\text{C}$  NMR (151 MHz, DMSO)  $\delta$  173.69, 169.78, 158.86 (C-F, q,  $^2J_{\text{C-F}} = 31.9$  Hz), 153.95, 144.62, 143.24, 142.62, 133.65, 133.47, 133.29, 126.19, 124.50, 124.30, 119.64, 117.59, 116.05, (C-F, q,  $^1J_{\text{C-F}} = 292.8$  Hz), 115.69, 113.79, 52.16, 51.82, 50.60, 44.28, 38.96, 36.87, 36.04, 29.27, 28.04, 26.16, 23.89, 23.04, 22.88; MS (ESI) ( $m/z$ ): 537.31,  $[\text{M}+\text{H}^+]$ : 538.30.

**2-{2-[1-benzyl-2-oxo-6-(2-phenoxyacetamido)-1,2,3,4-tetrahydroquinazolin-4-yl]acetamido}-2-methylpropanamide (CA4):**

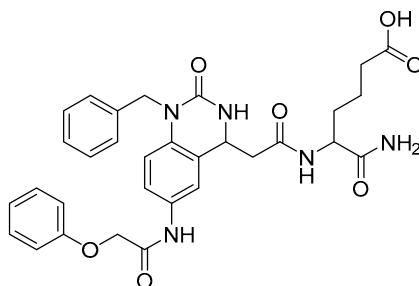

White solid; yield 75%;  $^1\text{H}$  NMR (600 MHz, DMSO)  $\delta$  10.07 (d,  $J = 112.5$  Hz, 1H), 7.95 (d,  $J = 13.3$  Hz, 1H), 7.48 (d,  $J = 2.0$  Hz, 1H), 7.39 – 7.26 (m, 5H), 7.23 (dd,  $J = 15.1, 7.5$  Hz, 2H),

7.18 – 7.04 (m, 2H), 7.02 – 6.68 (m, 6H), 5.05 (d,  $J = 11.9$  Hz, 1H), 4.80 – 4.62 (m, 3H), 4.52 – 4.45 (m, 1H), 2.53 (d,  $J = 6.6$  Hz, 2H), 1.34 – 1.24 (m, 6H);  $^{13}\text{C}$  NMR (151 MHz, DMSO)  $\delta$  176.74, 169.17, 166.70, 158.24, 154.24, 138.43, 133.85, 132.90, 129.96, 128.94, 127.15, 126.81, 124.02, 121.63, 120.05, 118.36, 115.08, 114.41, 67.45, 56.41, 50.70, 45.09, 25.92, 25.40; MS (ESI) ( $m/z$ ): 529.23,  $[\text{M}+\text{H}^+]$ : 530.25.

**4-{2-[1-(3-ammoniopropyl)-2-oxo-6-[2-(thiophen-2-yl)acetamido]-1,2,3,4-tetrahydroquinazolin-4-yl]acetamido}-4-carbamoylpiperidin-1-ium 2,2,2-trifluoroacetate (CA5)·TFA:**

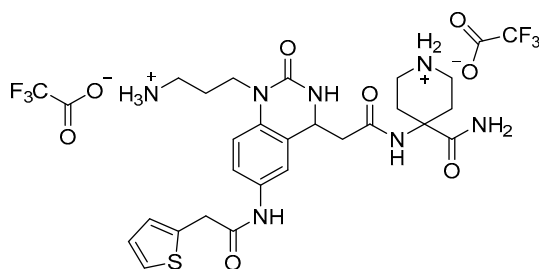

Yellowish white solid; yield 84%;  $^1\text{H}$  NMR (600 MHz, DMSO)  $\delta$  10.18 (s, 1H), 8.57 (d,  $J = 8.9$  Hz, 1H), 8.35 (d,  $J = 9.0$  Hz, 1H), 8.14 (s, 1H), 7.79 (s, 3H), 7.49 – 7.42 (m, 2H), 7.39 (dd,  $J = 4.4, 2.0$  Hz, 1H), 7.23 (s, 1H), 7.06 (d,  $J = 2.6$  Hz, 1H), 7.02 – 6.97 (m, 4H), 4.69 (td,  $J = 6.6, 2.7$  Hz, 1H), 3.94 – 3.88 (m, 2H), 3.85 (s, 2H), 3.13 – 2.84 (m, 6H), 2.64 – 2.54 (m, 2H), 2.13 – 2.06 (m, 2H), 1.97 (d,  $J = 10.6$  Hz, 2H), 1.87 (ddd,  $J = 23.3, 14.5, 7.2$  Hz, 2H);  $^{13}\text{C}$  NMR (151 MHz, DMSO)  $\delta$  174.92, 169.92, 168.24, 158.58 (C-F, q,  $^2J_{\text{C-F}} = 32.3$  Hz), 154.21, 137.63, 136.59, 133.79, 133.33, 127.15, 126.78, 125.54, 124.00, 119.58, 117.55 (C-F, q,  $^1J_{\text{C-F}} = 305.48$  Hz), 113.91, 55.89, 50.19, 44.39, 39.11, 37.87, 37.17, 29.17, 28.02, 25.61; MS (ESI) ( $m/z$ ): 527.23,  $[\text{M}+\text{H}^+]$ : 528.20.

**N-[4-(2-amino-2-oxoethyl)-1-methyl-2-oxo-1,2,3,4-tetrahydroquinazolin-6-yl]nicotinamide (CA6-a):**

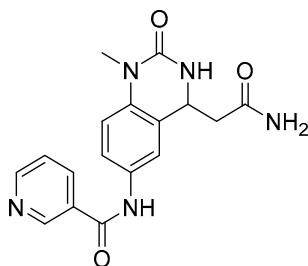

Yellow solid; yield 74%;  $^1\text{H}$  NMR (600 MHz, DMSO)  $\delta$  10.48 (s, 1H), 9.17 (s, 1H), 8.82 (s, 1H), 8.42 (d,  $J = 7.9$  Hz, 1H), 7.68 (dd,  $J = 8.5, 1.8$  Hz, 2H), 7.59 (s, 1H), 7.35 (s, 1H), 7.03 (s,

1H), 7.00 – 6.90 (m, 2H), 4.68 (t,  $J = 5.4$  Hz, 1H), 3.19 (s, 3H), 2.44 (dd,  $J = 6.8, 2.1$  Hz, 2H);  $^{13}\text{C}$  NMR (151 MHz, DMSO)  $\delta$  171.53, 163.58, 154.49, 151.18, 148.20, 147.99, 137.31, 135.56, 133.25, 124.59, 124.42, 120.77, 118.68, 113.56, 50.20, 43.85, 29.64; MS (ESI) ( $m/z$ ): 339.13,  $[\text{M}+\text{H}^+]$ : 340.15.

***N*-[4-(2-amino-2-oxoethyl)-1-methyl-2-oxo-1,2,3,4-tetrahydroquinazolin-6-yl]-2-phenoxyacetamide (CA6-b):**

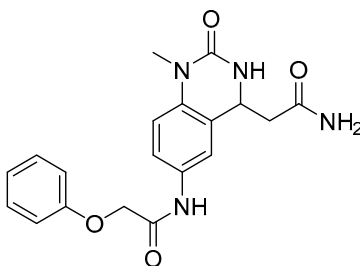

White solid; yield 78%;  $^1\text{H}$  NMR (600 MHz, DMSO)  $\delta$  10.04 (s, 1H), 7.57 (dd,  $J = 8.8, 2.2$  Hz, 1H), 7.43 (d,  $J = 2.1$  Hz, 1H), 7.34 – 7.30 (m, 3H), 7.02 – 6.97 (m, 4H), 6.95 – 6.90 (m, 2H), 4.68 – 4.63 (m, 3H), 3.16 (s, 3H), 2.41 (dd,  $J = 6.8, 3.8$  Hz, 2H);  $^{13}\text{C}$  NMR (151 MHz, DMSO)  $\delta$  171.50, 166.66, 158.30, 154.47, 135.24, 132.93, 129.98, 124.43, 121.63, 120.10, 118.04, 115.14, 113.55, 67.54, 50.15, 43.77, 29.61; MS (ESI) ( $m/z$ ): 368.15,  $[\text{M}+\text{H}^+]$ : 369.15.

**2-{6-[(2-methoxyphenyl)sulfonamido]-1-methyl-2-oxo-1,2,3,4-tetrahydroquinazolin-4-yl}acetamide (CA7-a):**

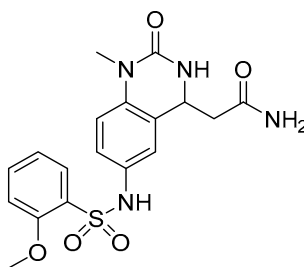

White solid; yield 84%;  $^1\text{H}$  NMR (600 MHz, DMSO)  $\delta$  9.71 (s, 1H), 7.68 (dd,  $J = 7.8, 1.6$  Hz, 1H), 7.56 – 7.52 (m, 1H), 7.27 (s, 1H), 7.17 (d,  $J = 8.3$  Hz, 1H), 6.99 (t,  $J = 7.6$  Hz, 1H), 6.95 (dd,  $J = 8.7, 2.4$  Hz, 2H), 6.92 (d,  $J = 2.3$  Hz, 1H), 6.84 (s, 1H), 6.78 (d,  $J = 8.8$  Hz, 1H), 4.54 (td,  $J = 6.8, 2.9$  Hz, 1H), 3.92 (s, 3H), 3.07 (s, 3H), 2.28 (ddd,  $J = 50.0, 14.7, 6.9$  Hz, 2H);  $^{13}\text{C}$  NMR (151 MHz, DMSO)  $\delta$  171.24, 156.76, 154.36, 135.83, 135.38, 131.95, 130.74, 126.64, 124.74, 121.05, 120.49, 119.14, 113.80, 113.17, 56.52, 49.87, 43.61, 29.55; MS (ESI) ( $m/z$ ): 404.12,  $[\text{M}+\text{H}^+]$ : 405.10.



**2-{6-[(2-fluorophenyl)sulfonamido]-3-[(2-fluorophenyl)sulfonyl]-1-methyl-2-oxo-1,2,3,4-tetrahydroquinazolin-4-yl}acetamide (CA7-b'):**

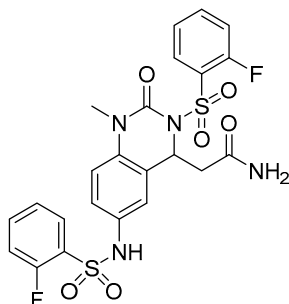

White solid; yield 76%;  $^1\text{H}$  NMR (600 MHz, DMSO)  $\delta$  7.93 – 7.78 (m, 4H), 7.54 (t,  $J$  = 8.2 Hz, 2H), 7.47 (dt,  $J$  = 12.2, 7.7 Hz, 2H), 7.35 (s, 1H), 7.20 (d,  $J$  = 3.0 Hz, 1H), 7.10 (dd,  $J$  = 8.7, 2.1 Hz, 1H), 7.01 (dd,  $J$  = 7.6, 5.5 Hz, 2H), 6.94 (s, 1H), 4.65 (td,  $J$  = 6.8, 3.2 Hz, 1H), 3.18 (s, 3H), 2.32 (ddd,  $J$  = 21.4, 15.0, 6.9 Hz, 2H);  $^{13}\text{C}$  NMR (151 MHz, DMSO)  $\delta$  171.11, 159.59, 157.89 (C-F, q,  $^1J_{\text{C-F}}$  = 254.62 Hz), 153.93, 141.03, 138.46, 132.04, 131.89, 129.12, 125.74, 125.64, 124.99, 118.18, 114.20, 49.48, 43.65, 29.86; MS (ESI) ( $m/z$ ): 550.08,  $[\text{M}+\text{H}^+]$ : 551.10.

# $^1\text{H}$ NMR and $^{13}\text{C}$ NMR Spectrometry

## $^1\text{H}$ NMR spectra ( $d_6$ -DMSO) of *N*-Alloc-3-amino-3-(2-fluoro-5-nitrophenyl)propionic acid **3**

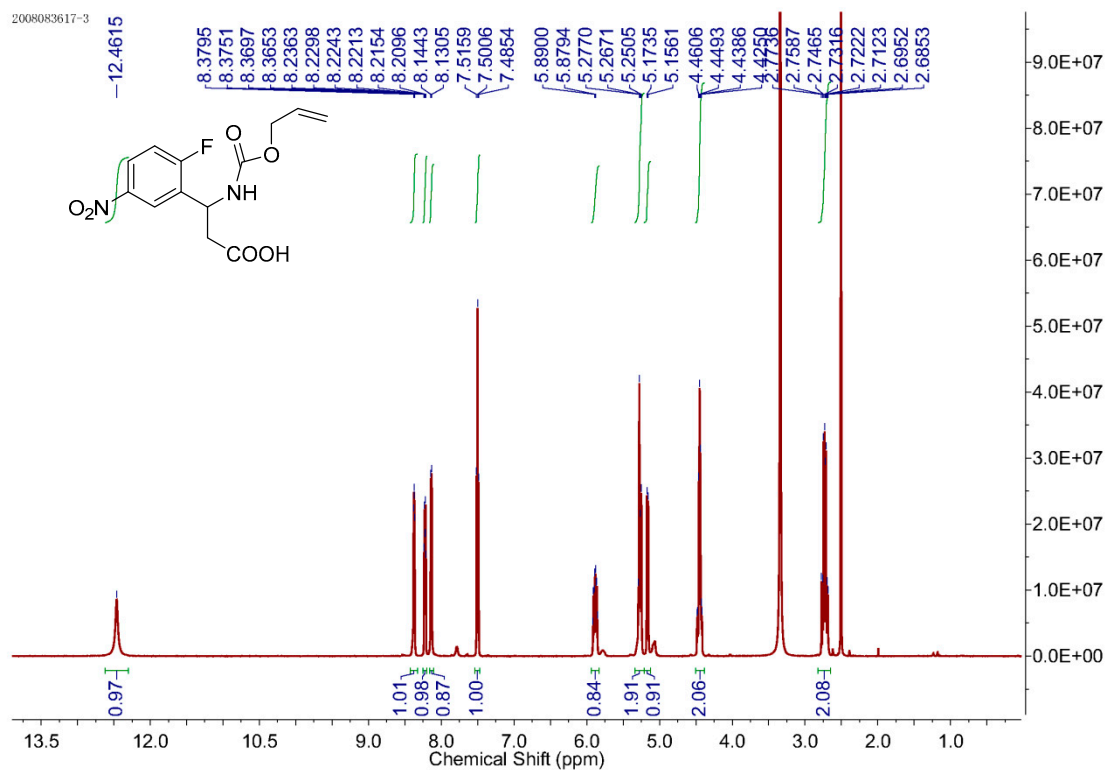

## $^1\text{H}$ NMR spectra ( $\text{D}_2\text{O}$ ) of (CA1-g)·TFA

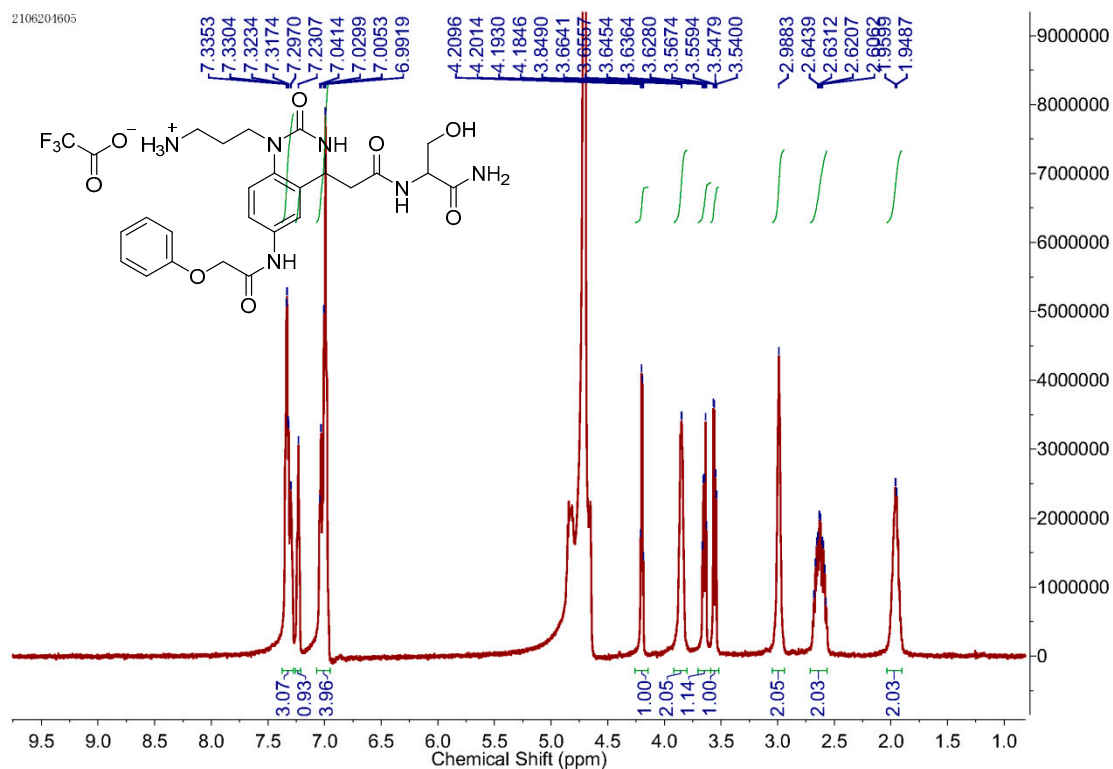

**<sup>1</sup>H NMR and <sup>13</sup>C NMR spectra (d6-DMSO) of *N*-Alloc-3-amino-3-(2-fluoro-5-nitrophenyl) propionic acid 3'**

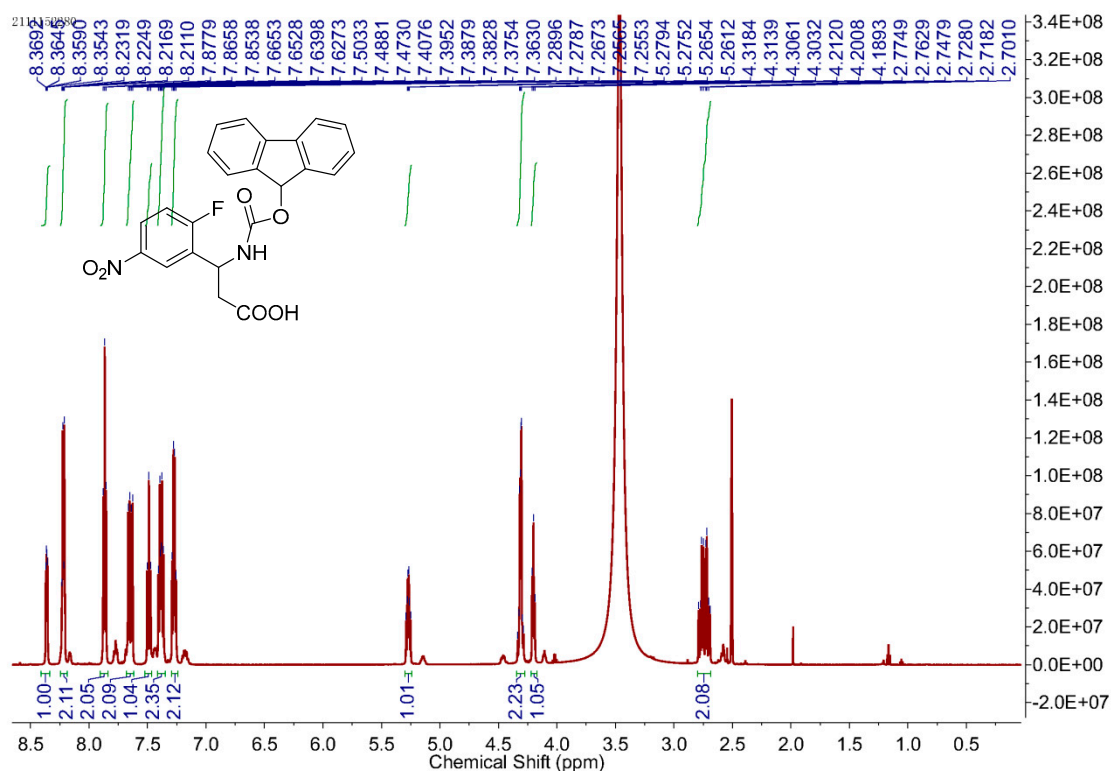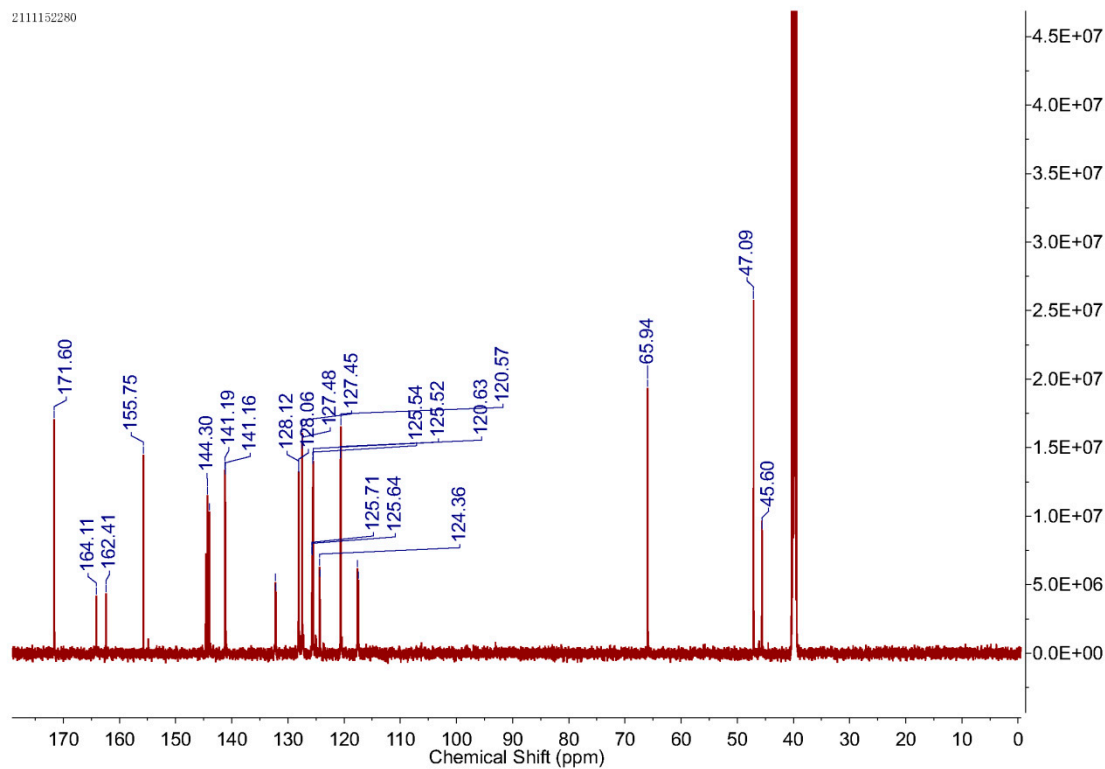

**(CA1-6)·TFA**

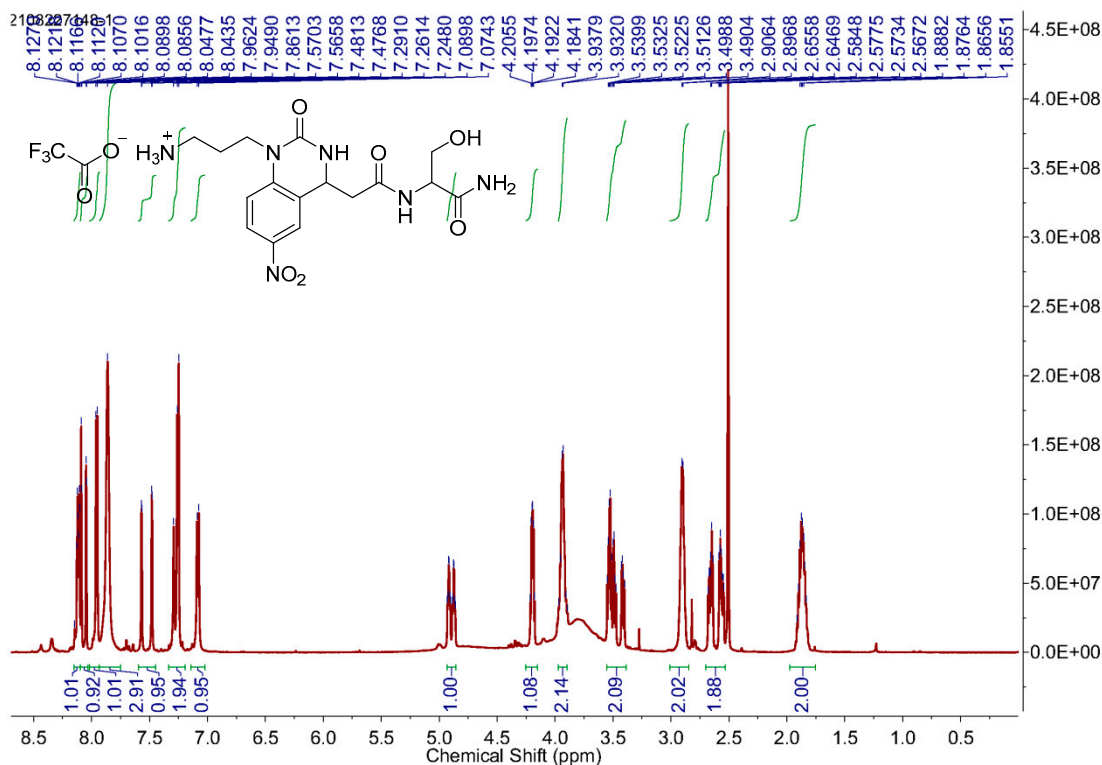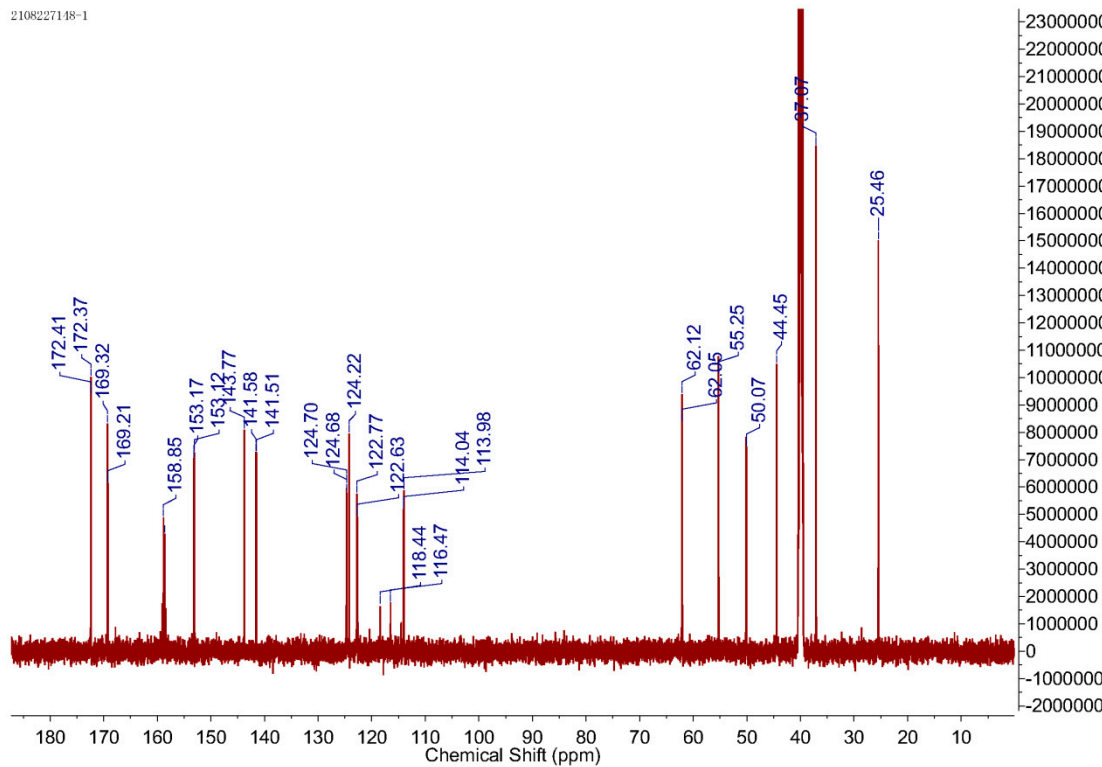

(CA1-7)·TFA

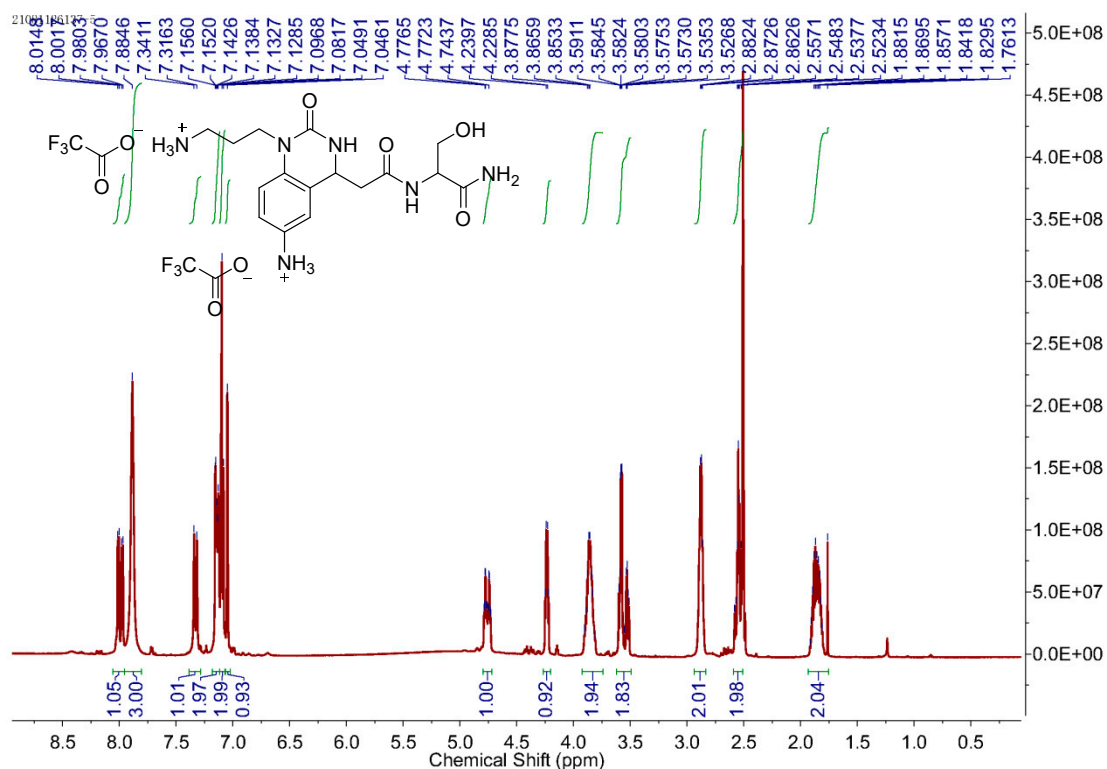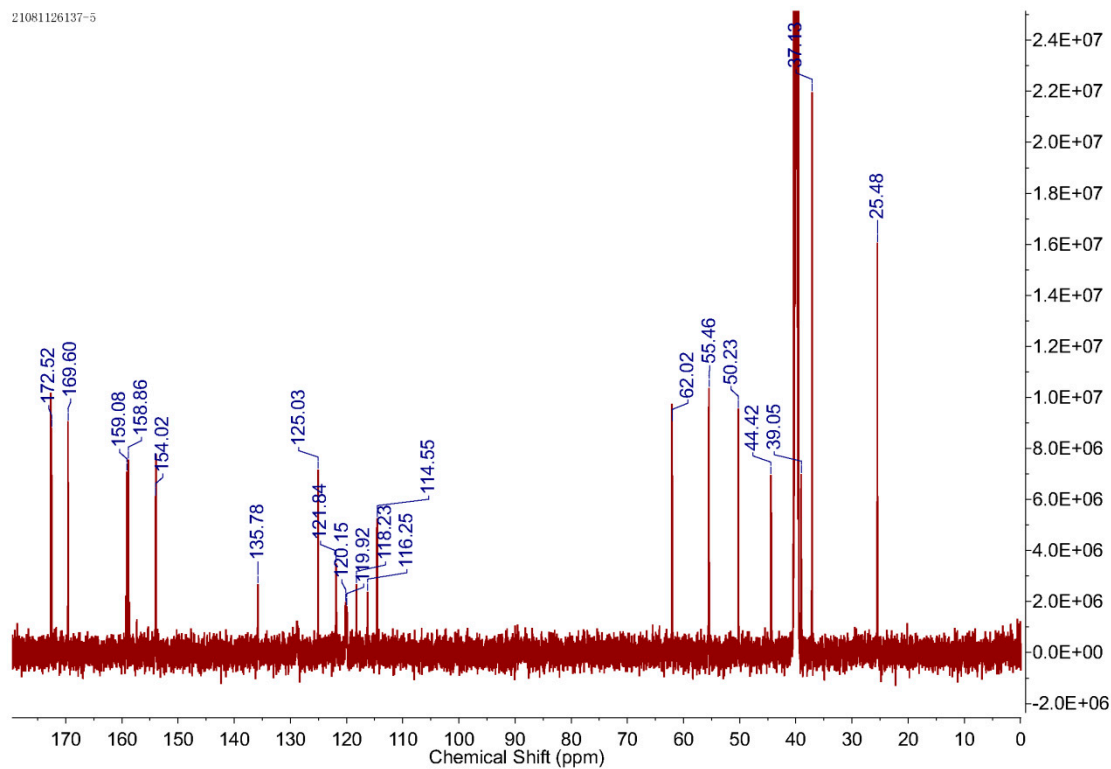

(CA1-a)·TFA

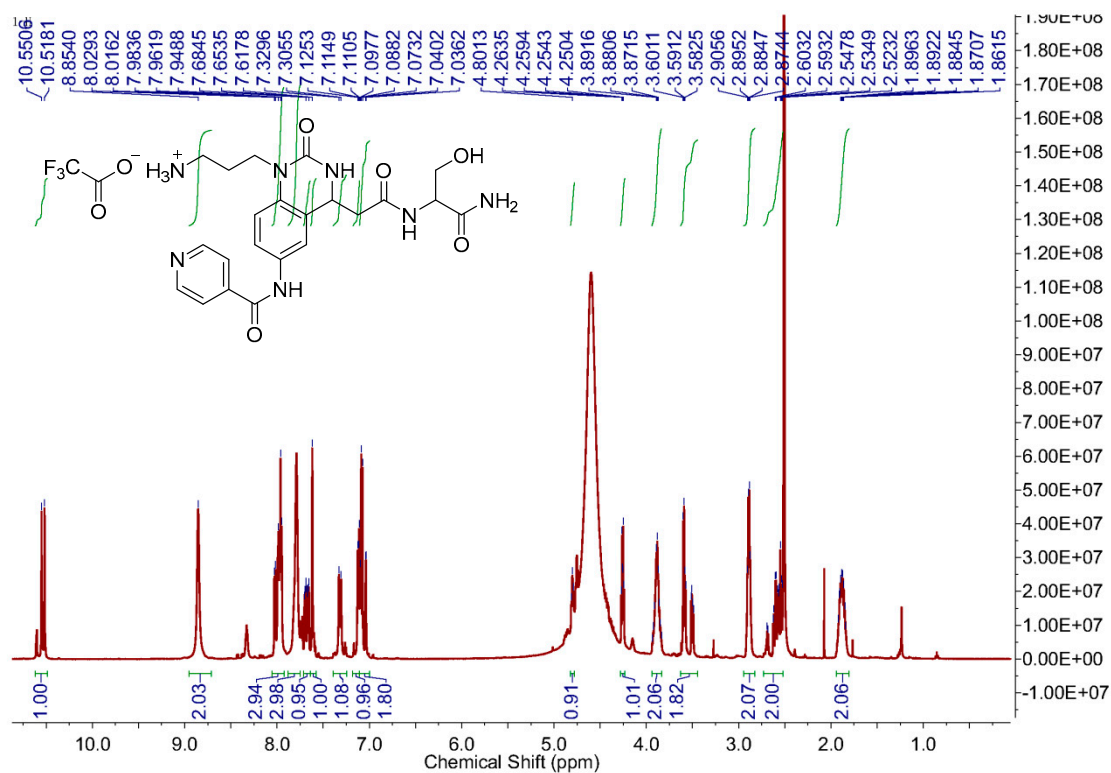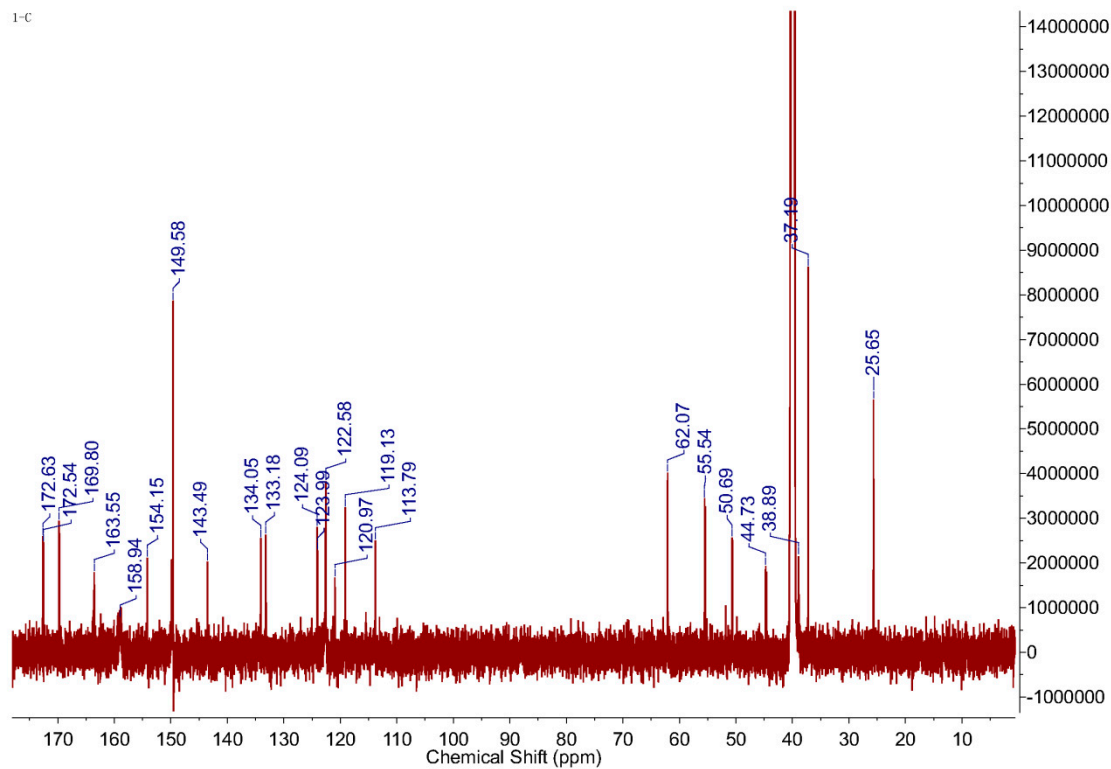

(CA1-b)·TFA

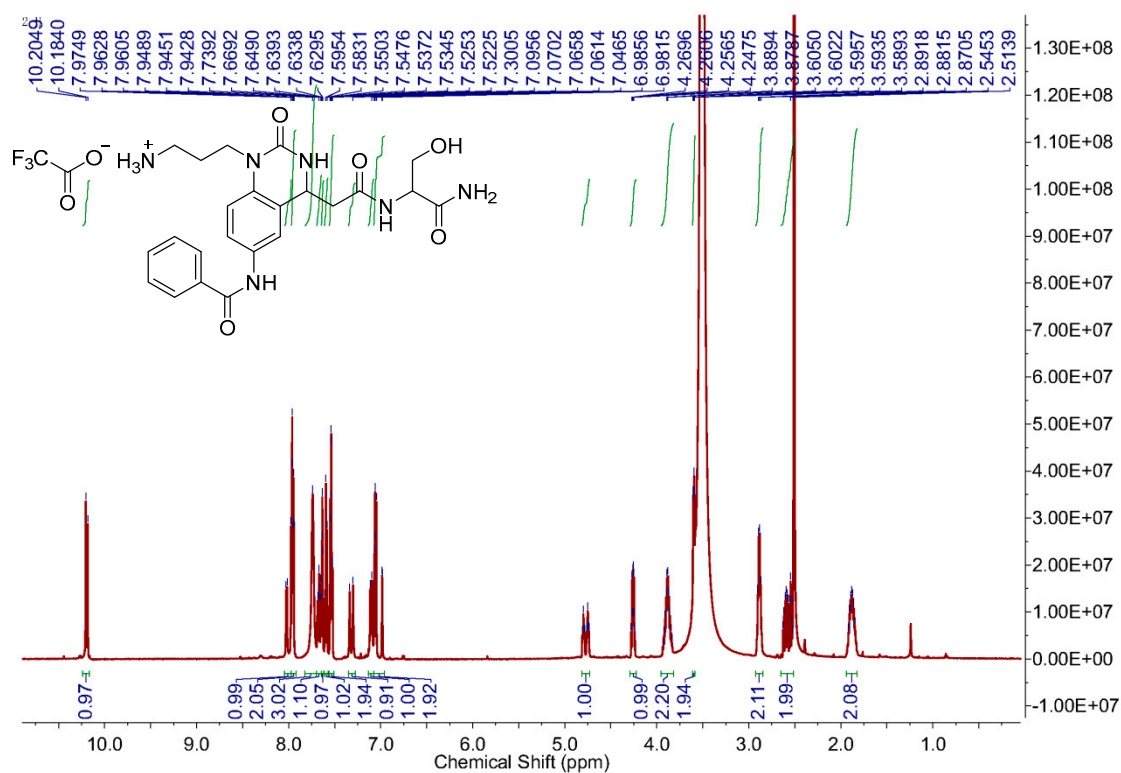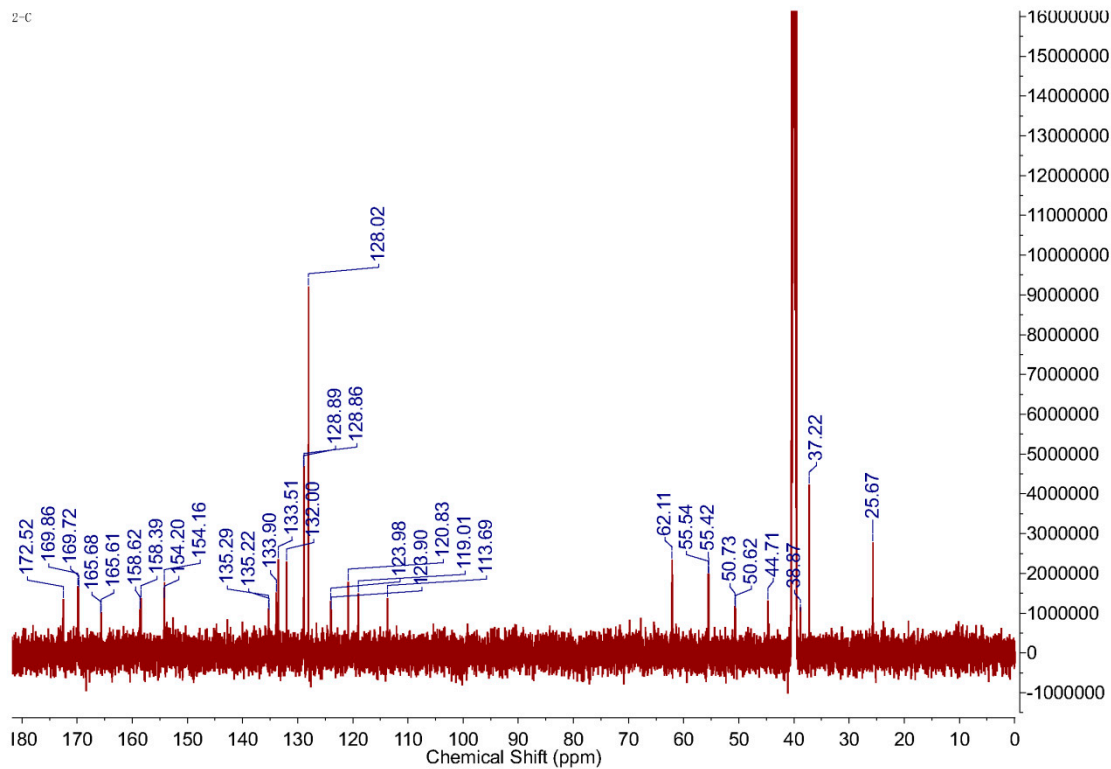



(CA1-c)·TFA

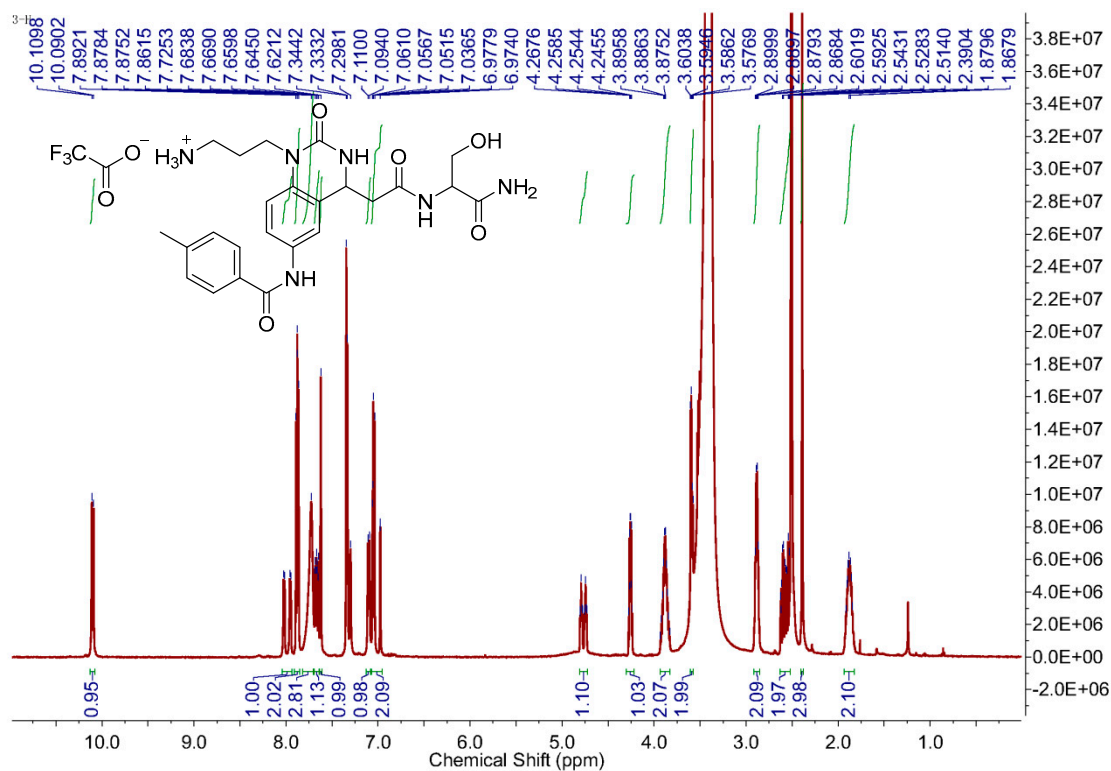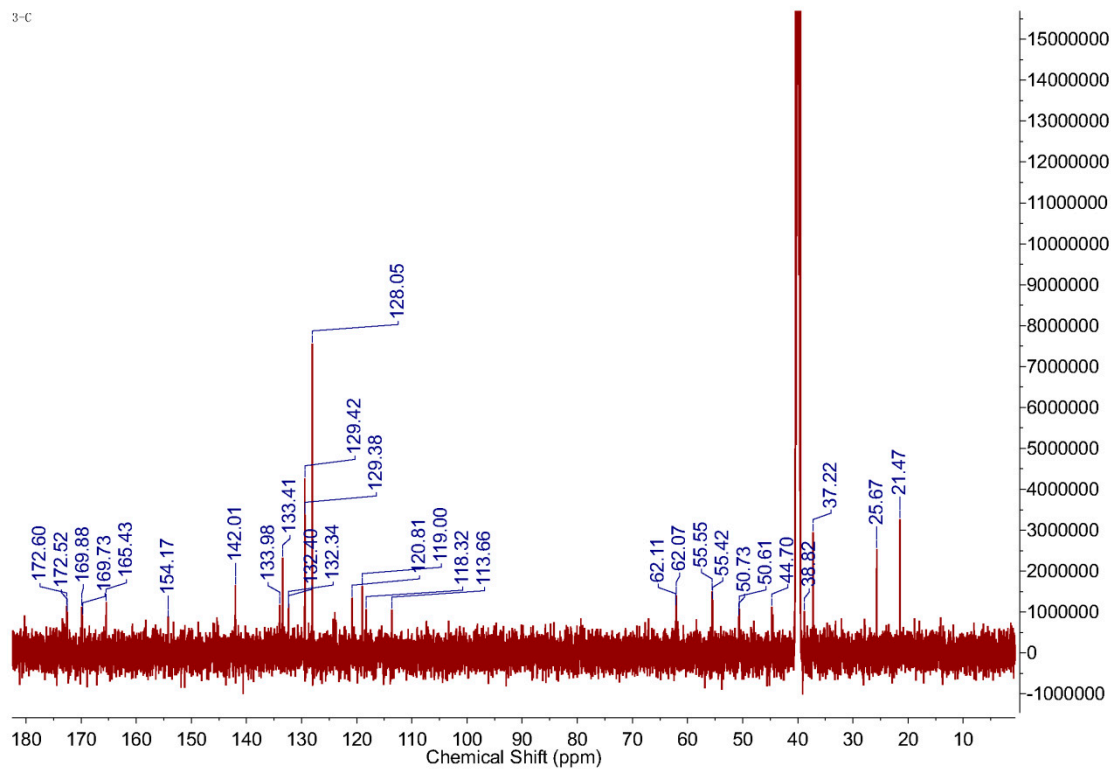



(CA1-d)·TFA

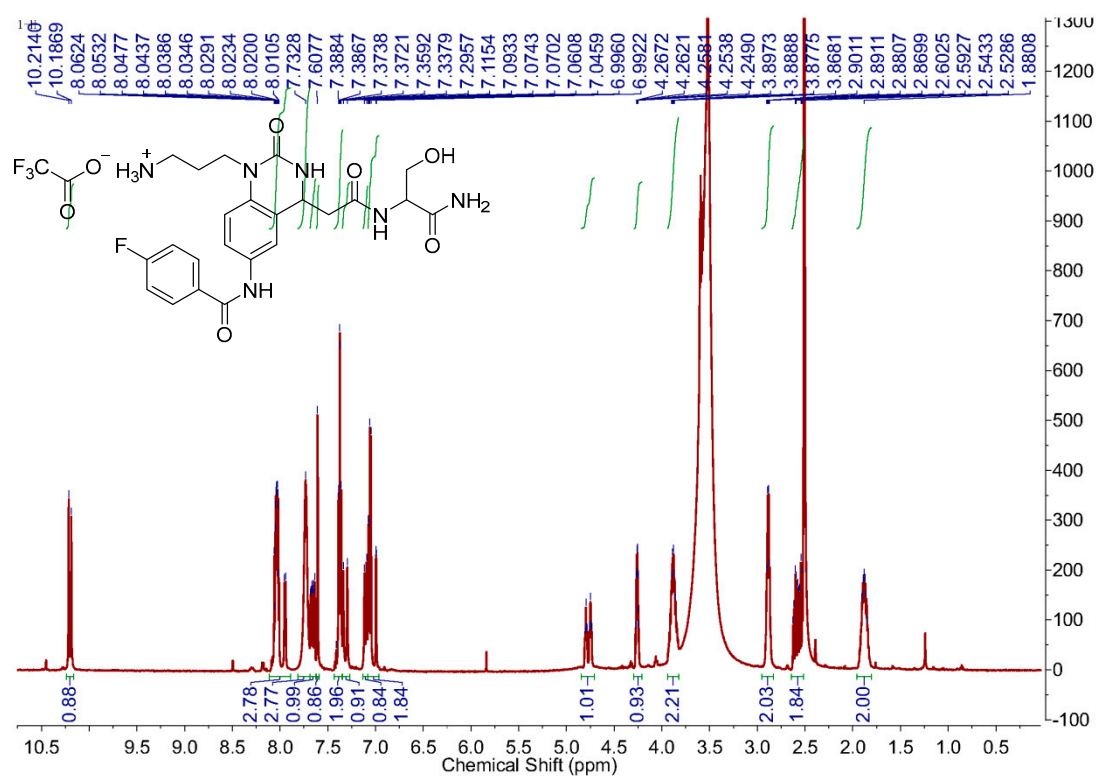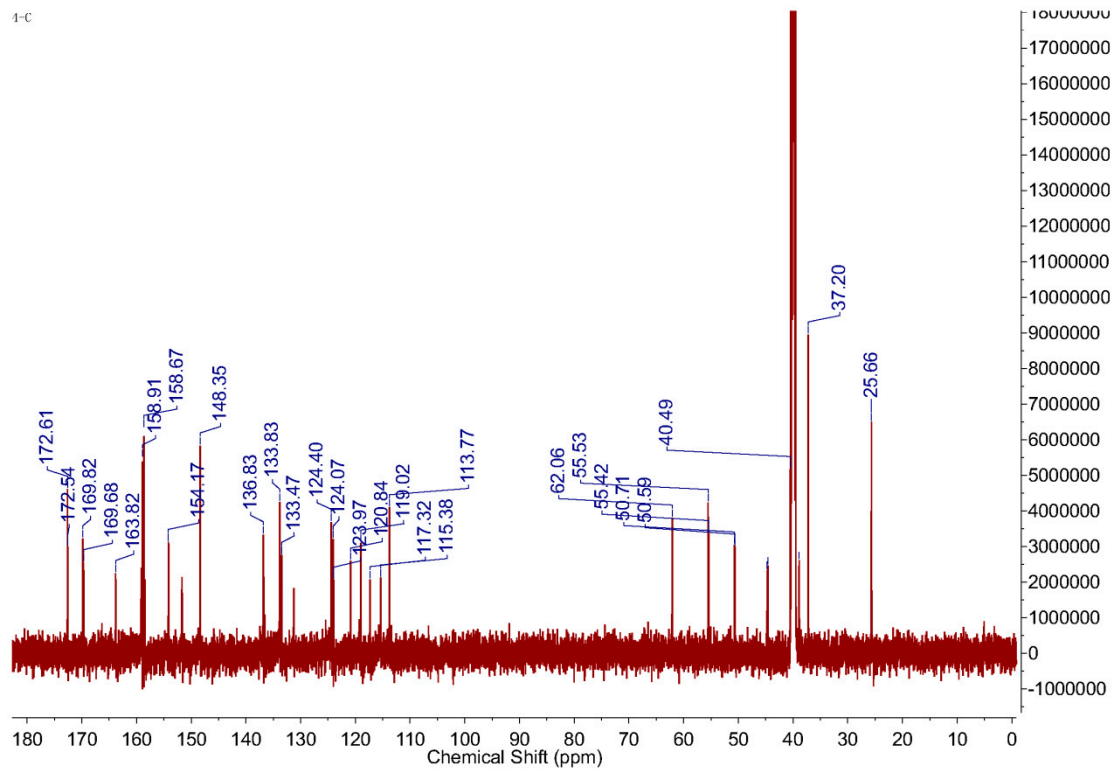

(CA1-e)·TFA

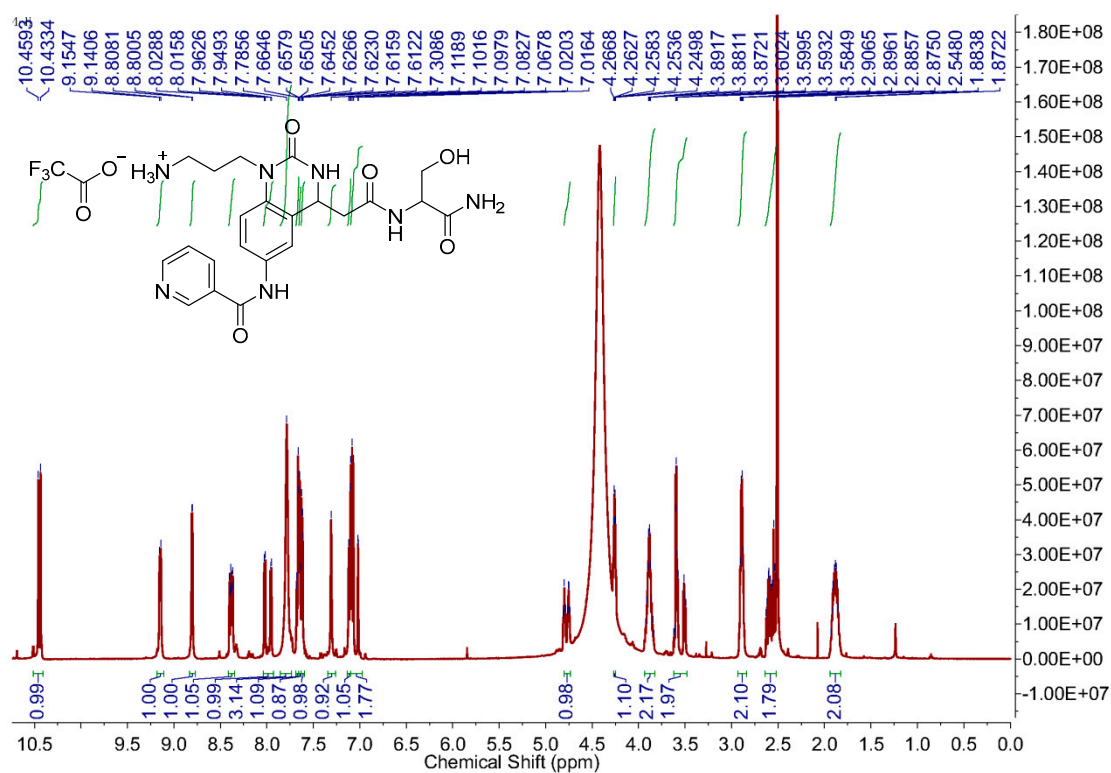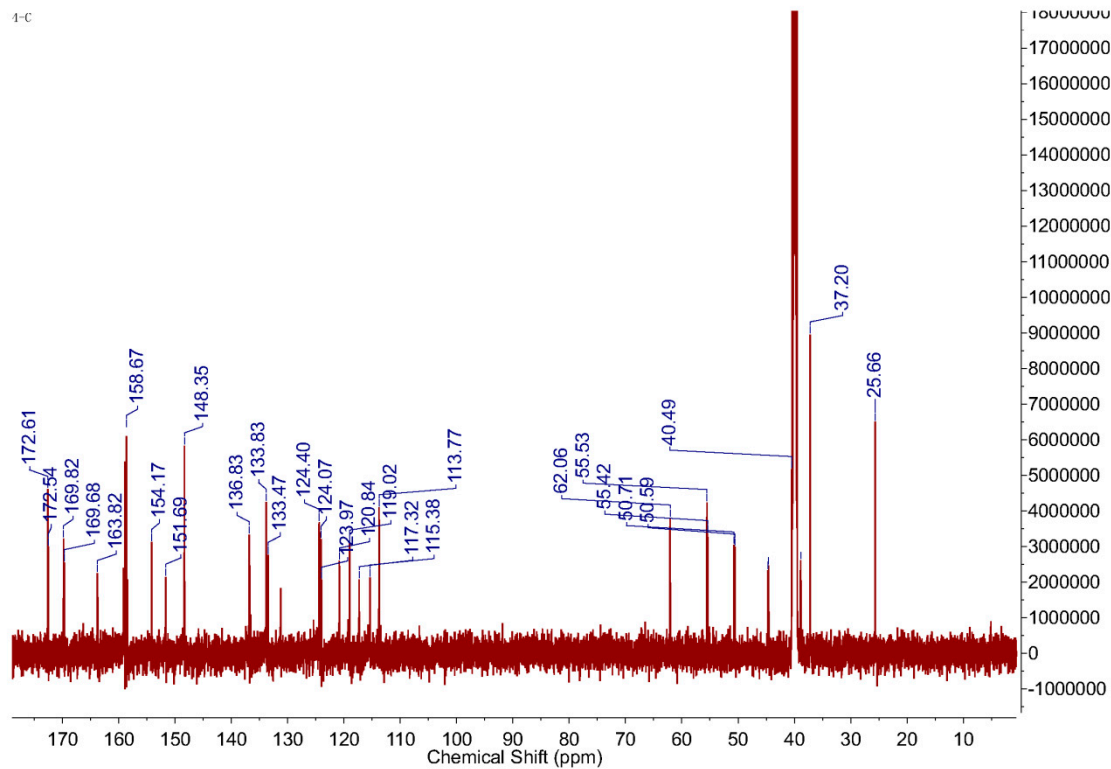

(CA1-f)·TFA

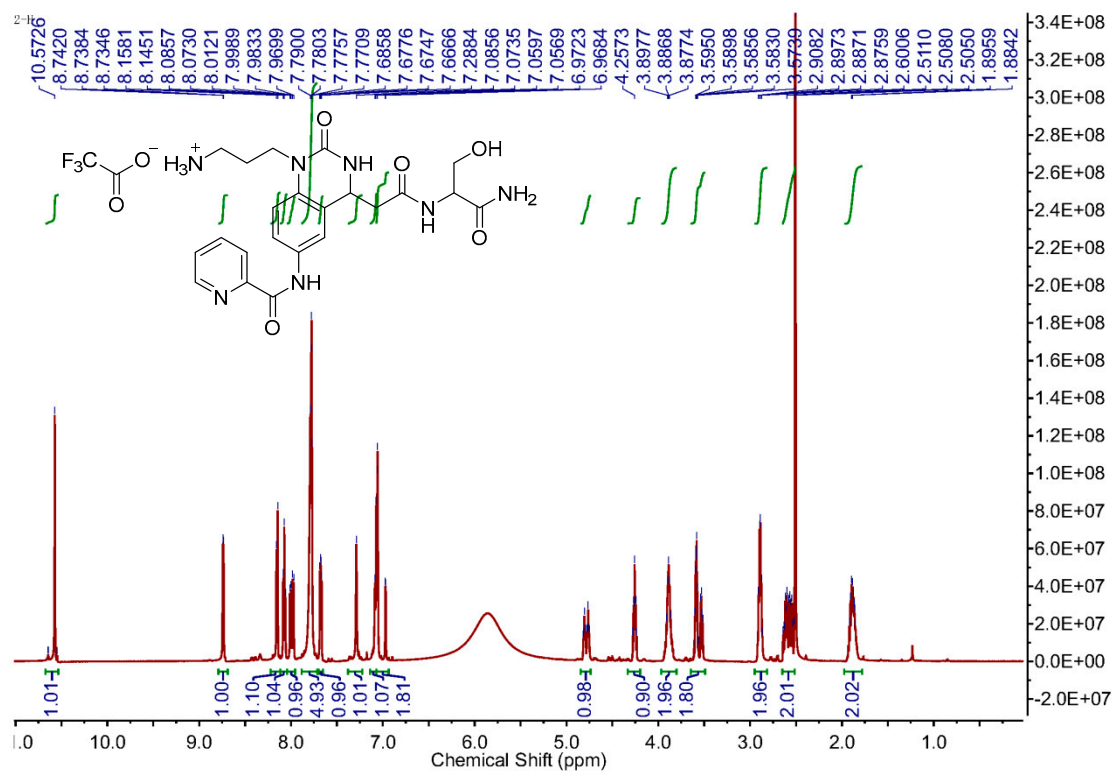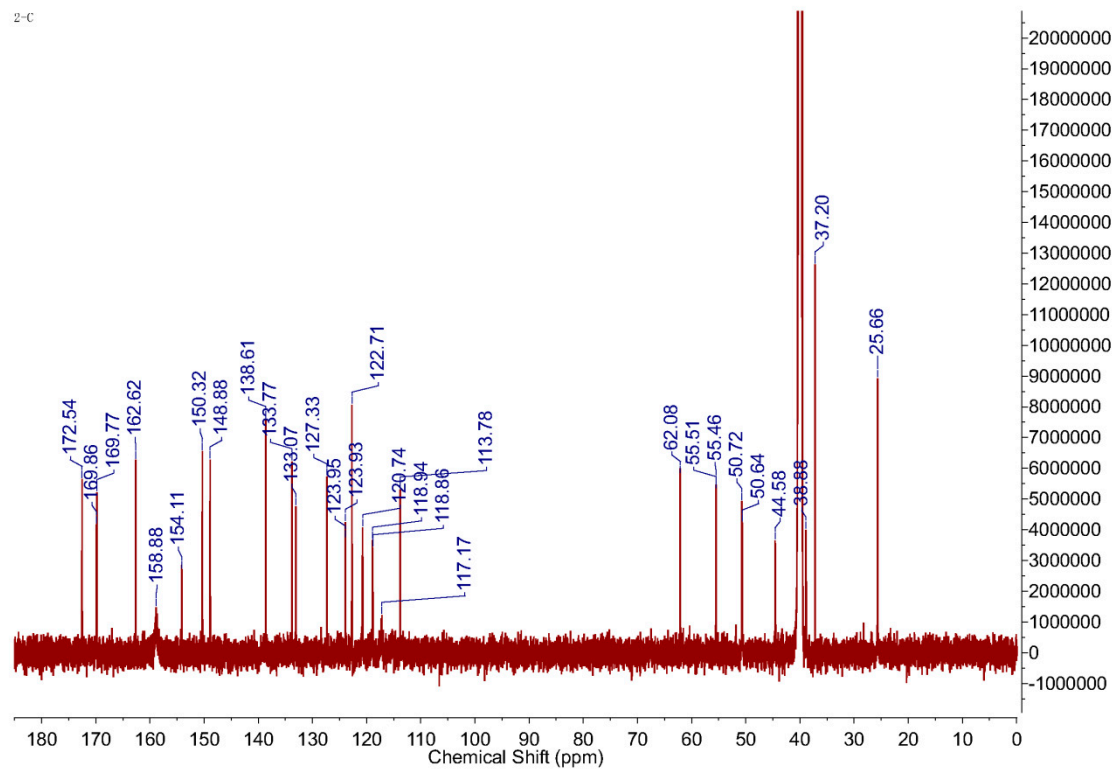

(CA1-g)·TFA

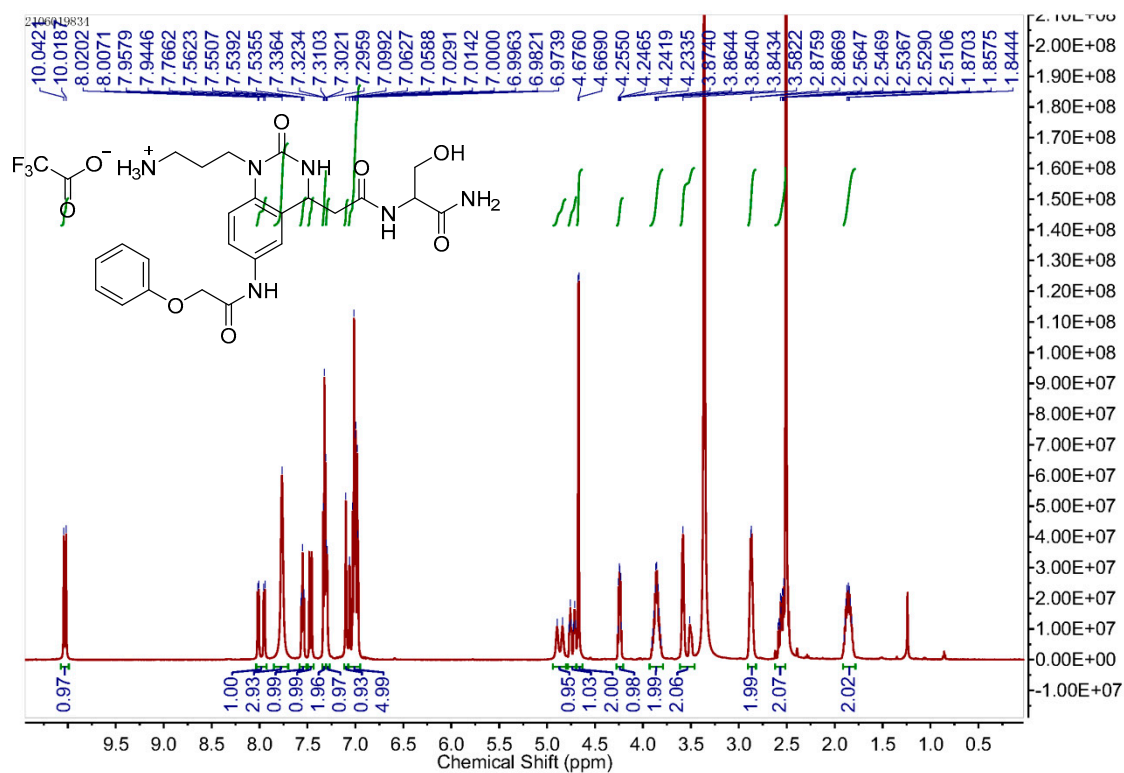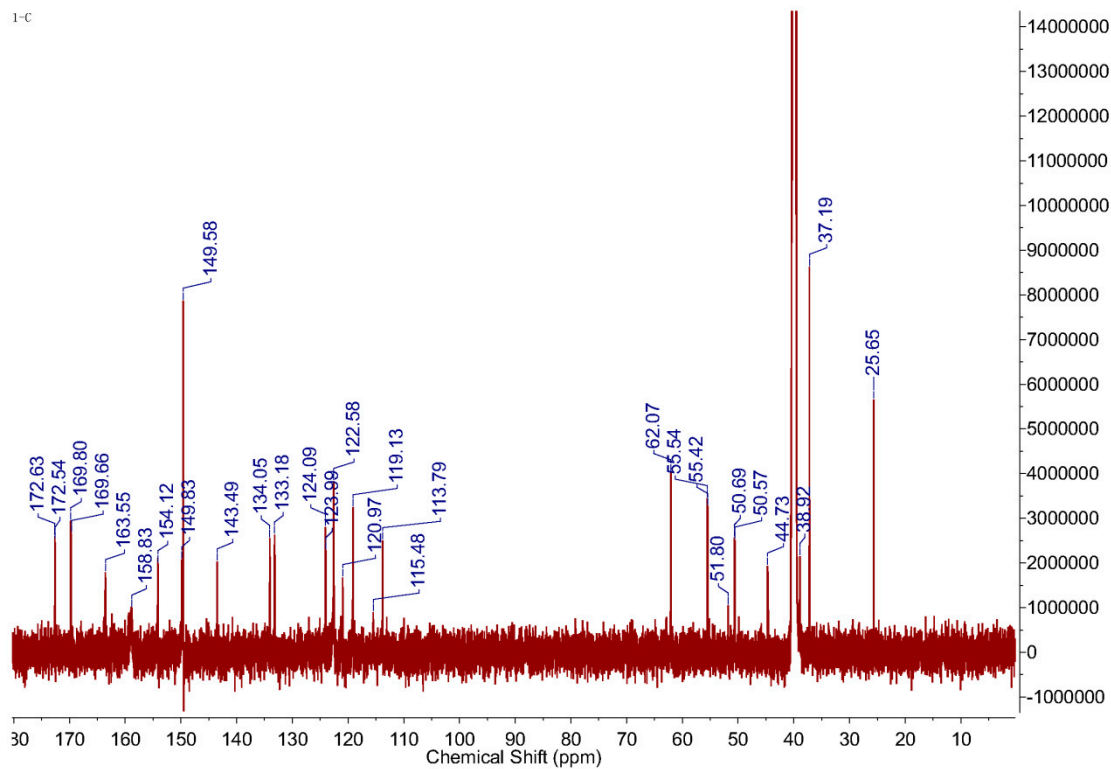

(CA1-h)·TFA

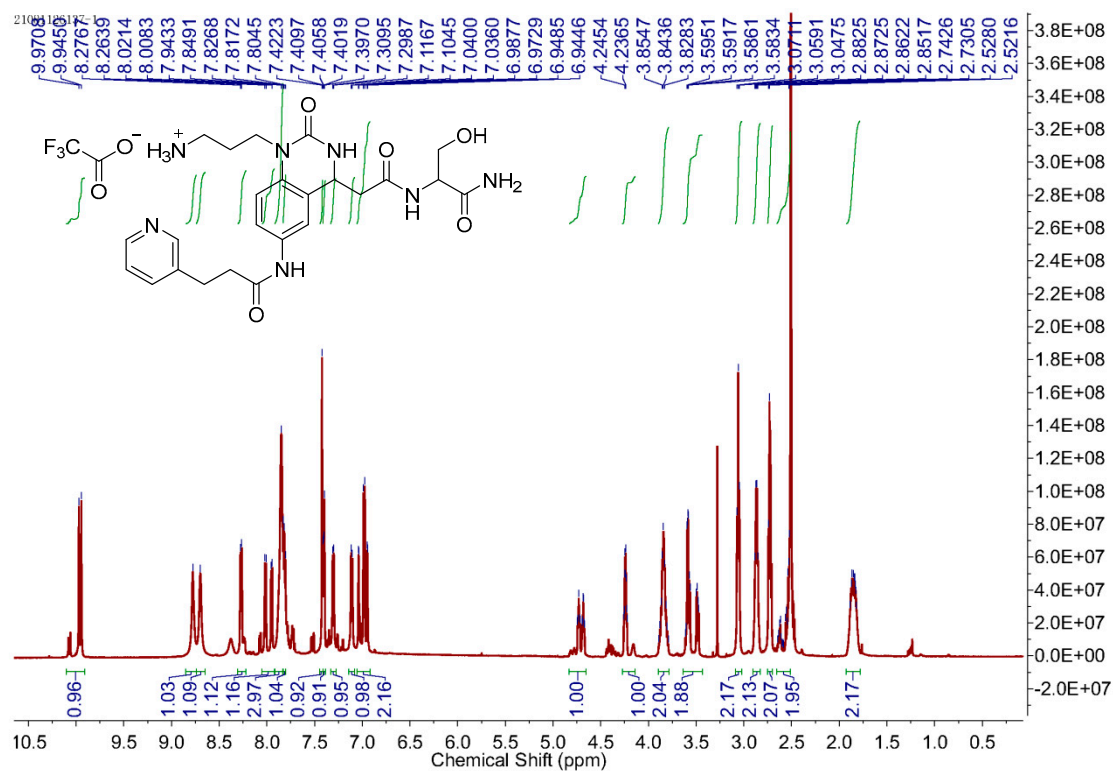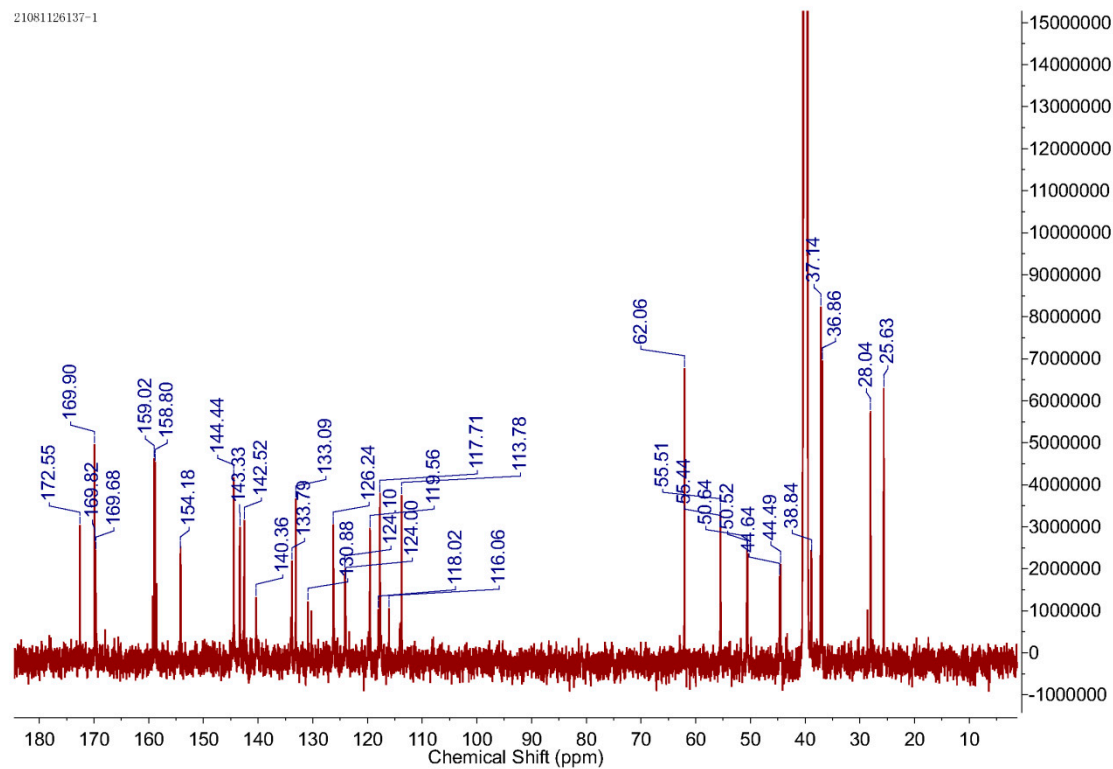



(CA1-i)·TFA

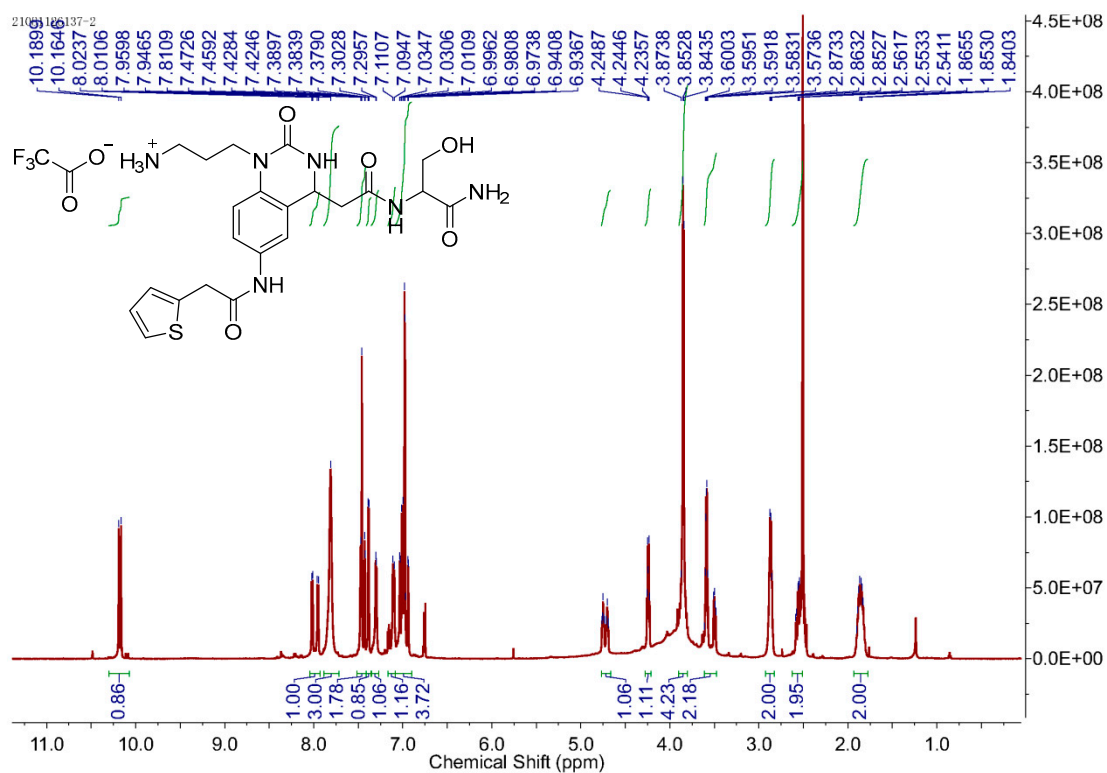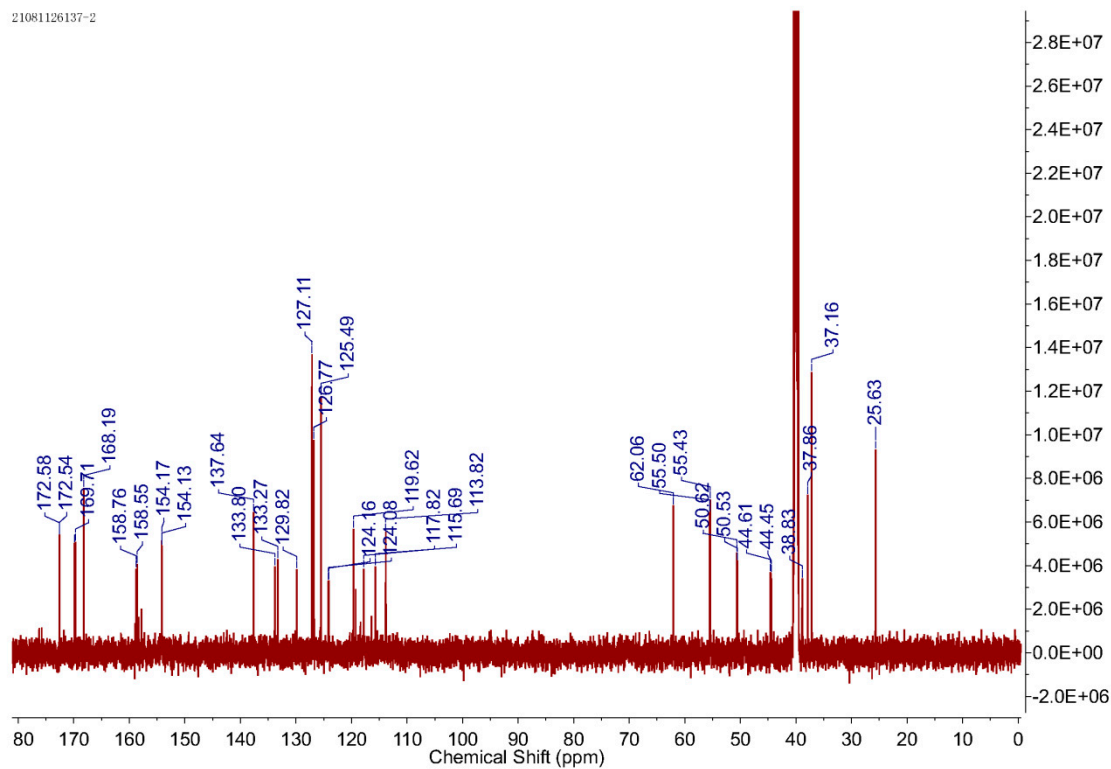

(CA1-j)·TFA

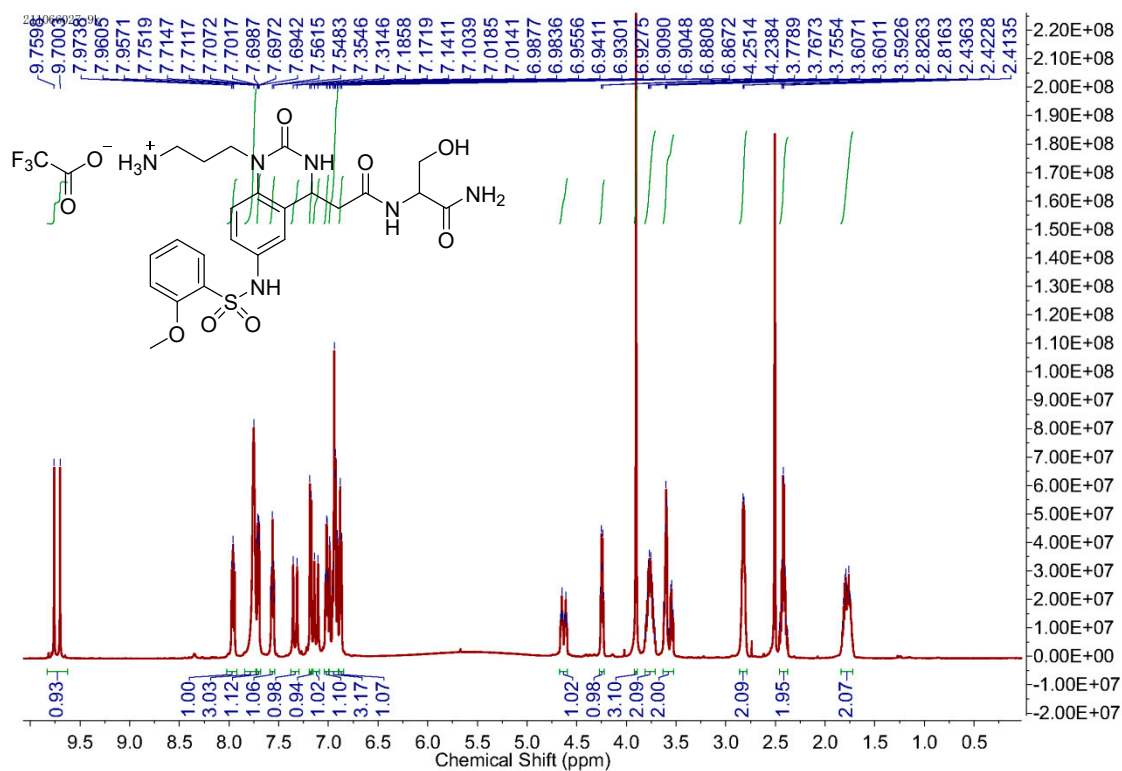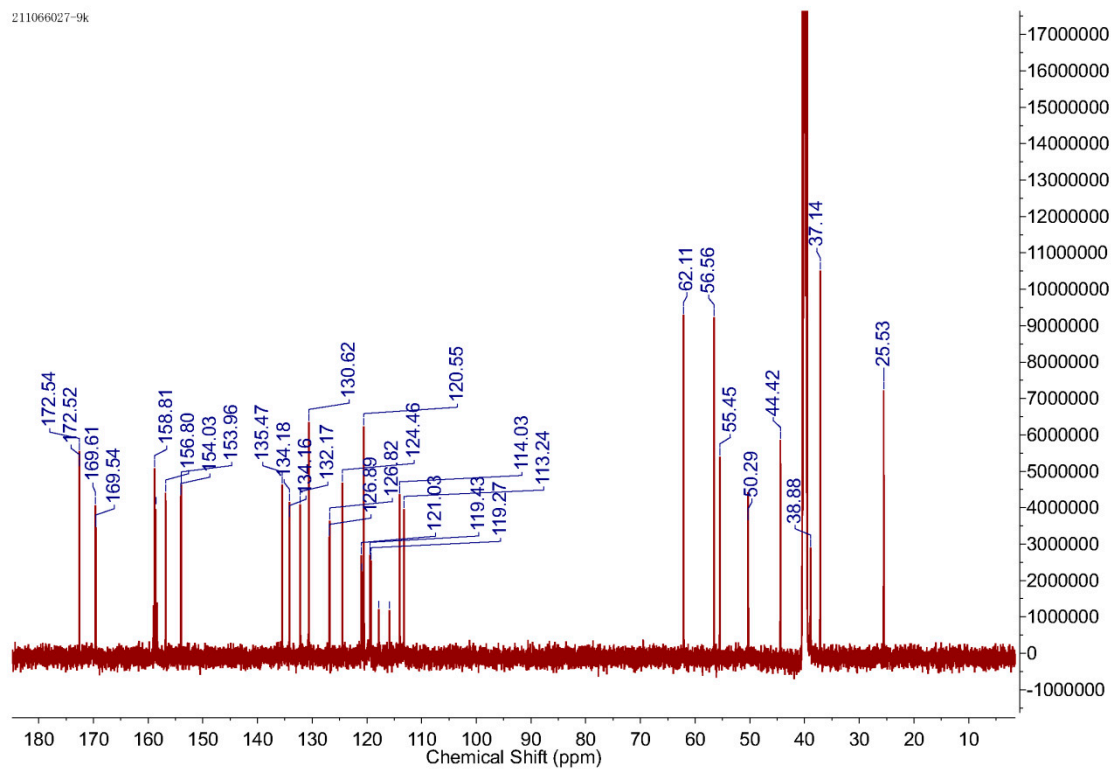

(CA3)·TFA

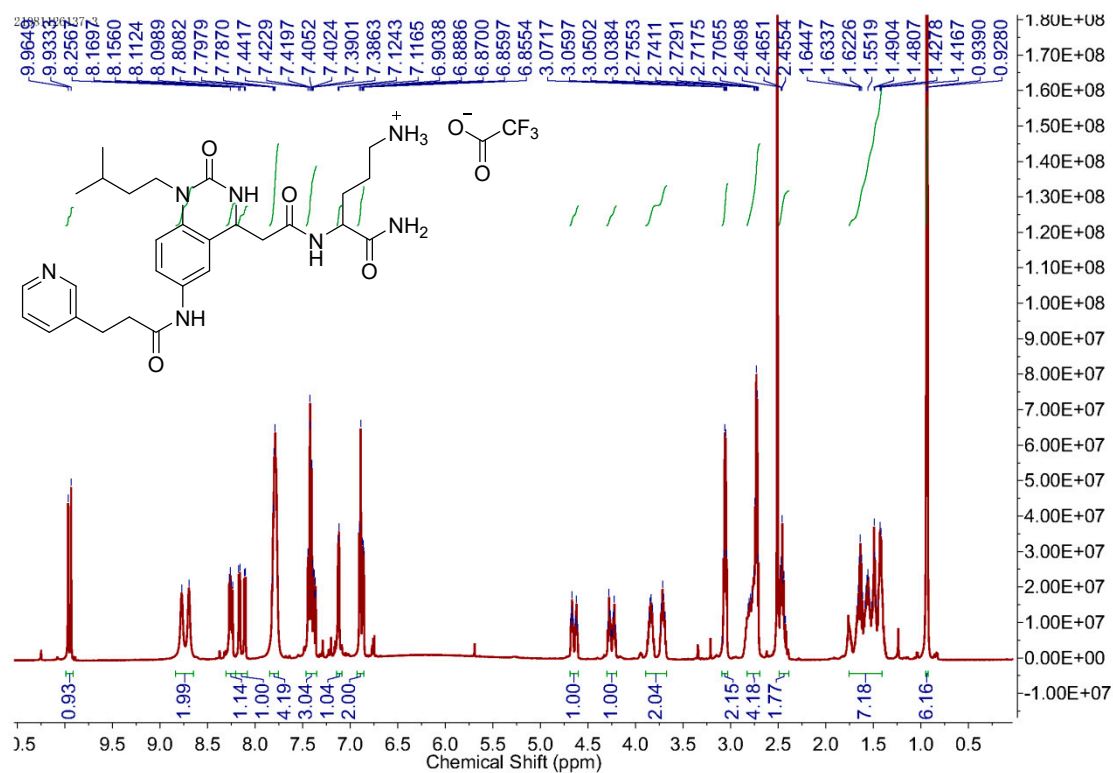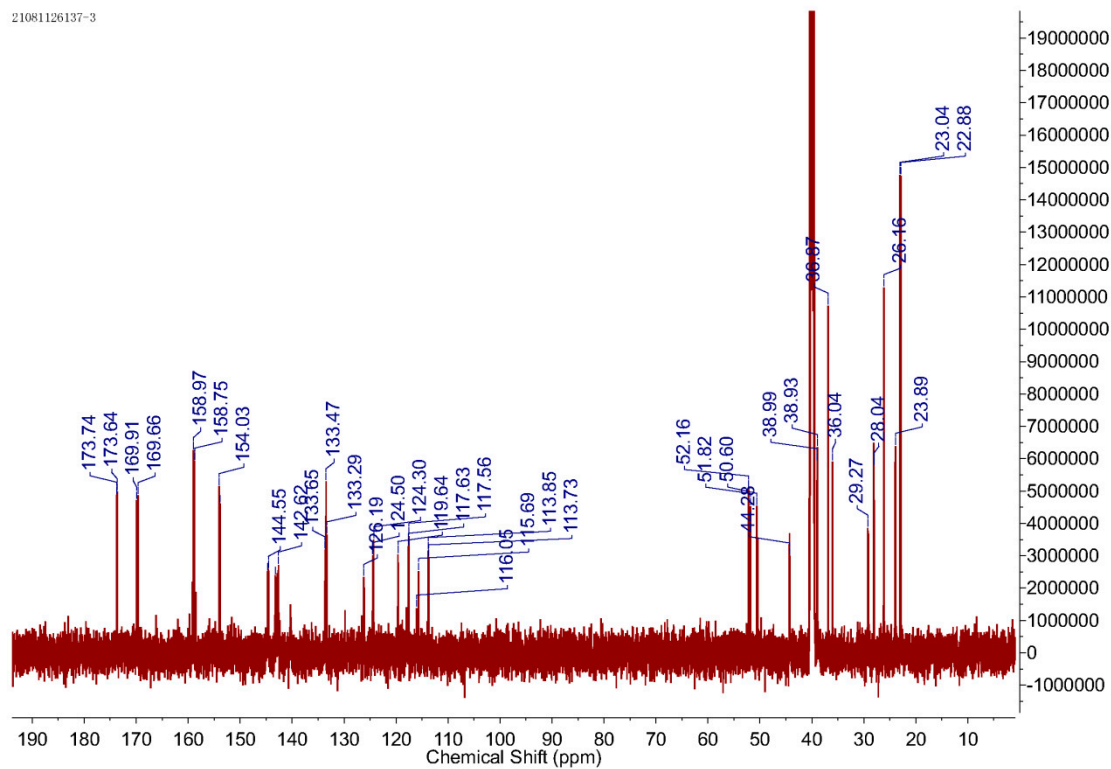



CA4

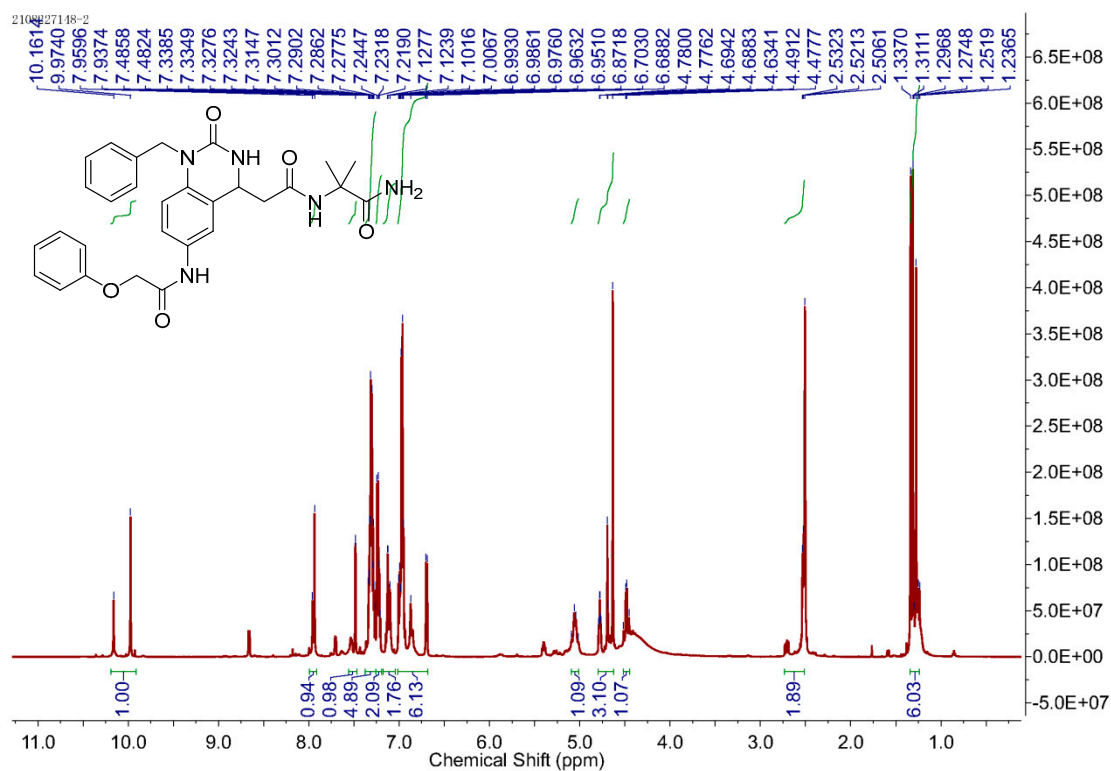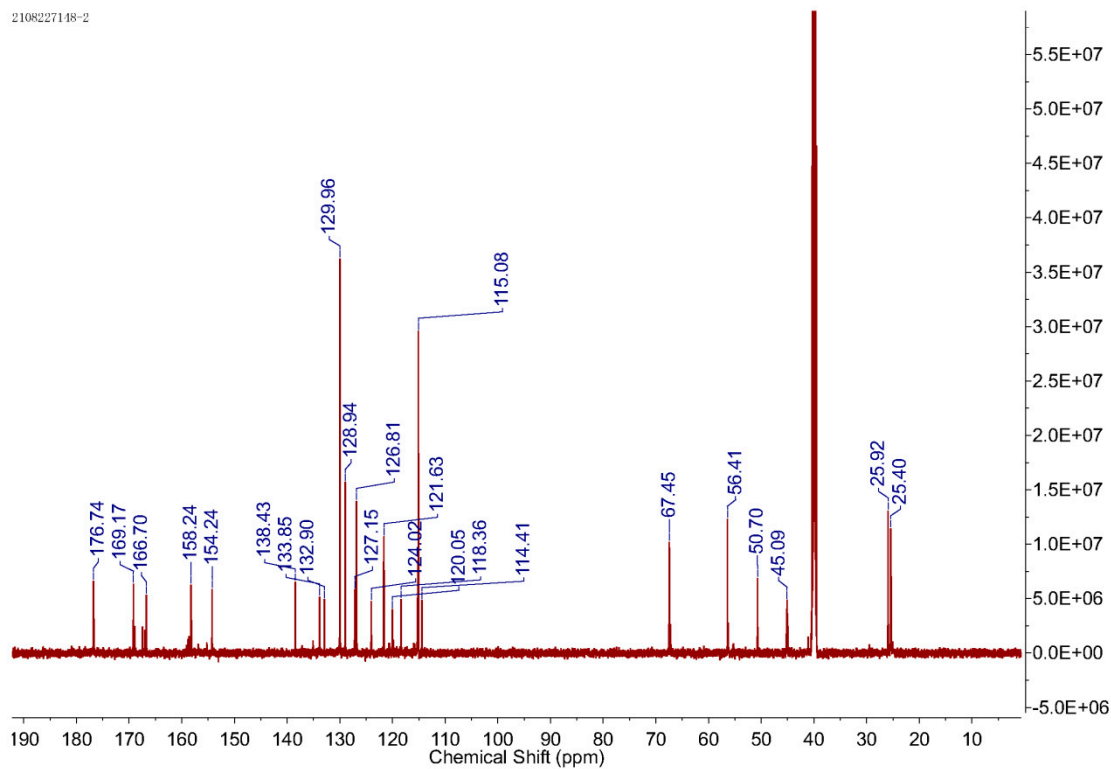

**(CA5)·TFA**

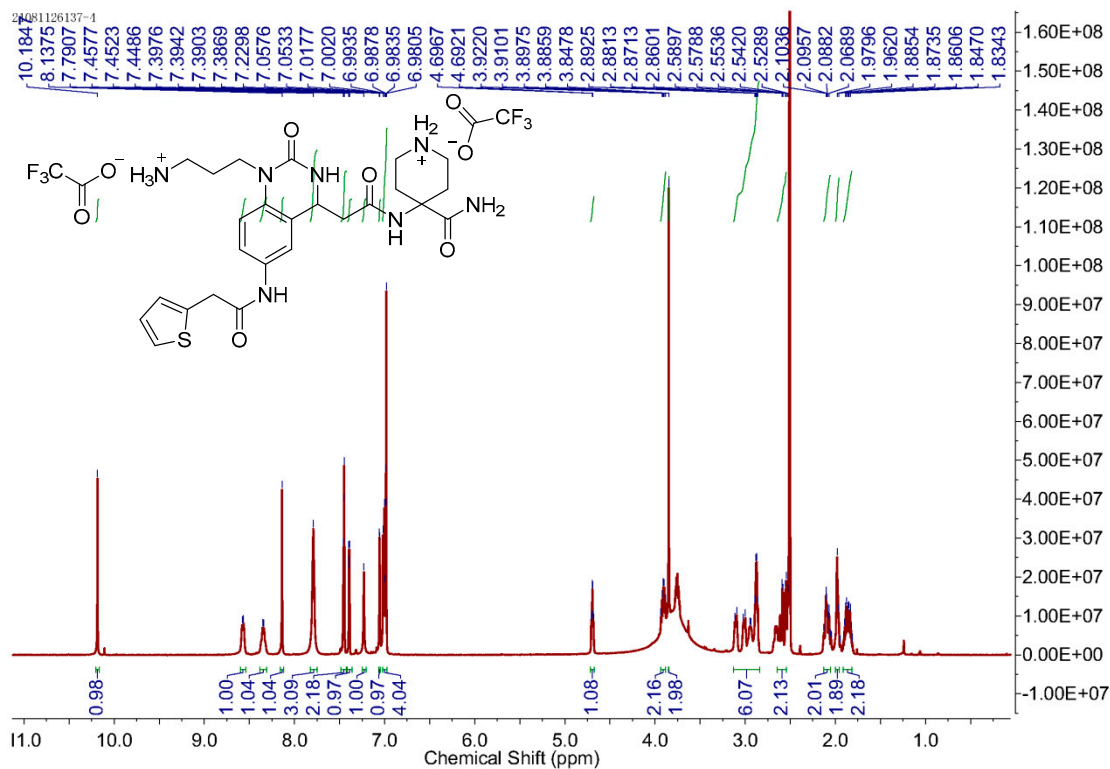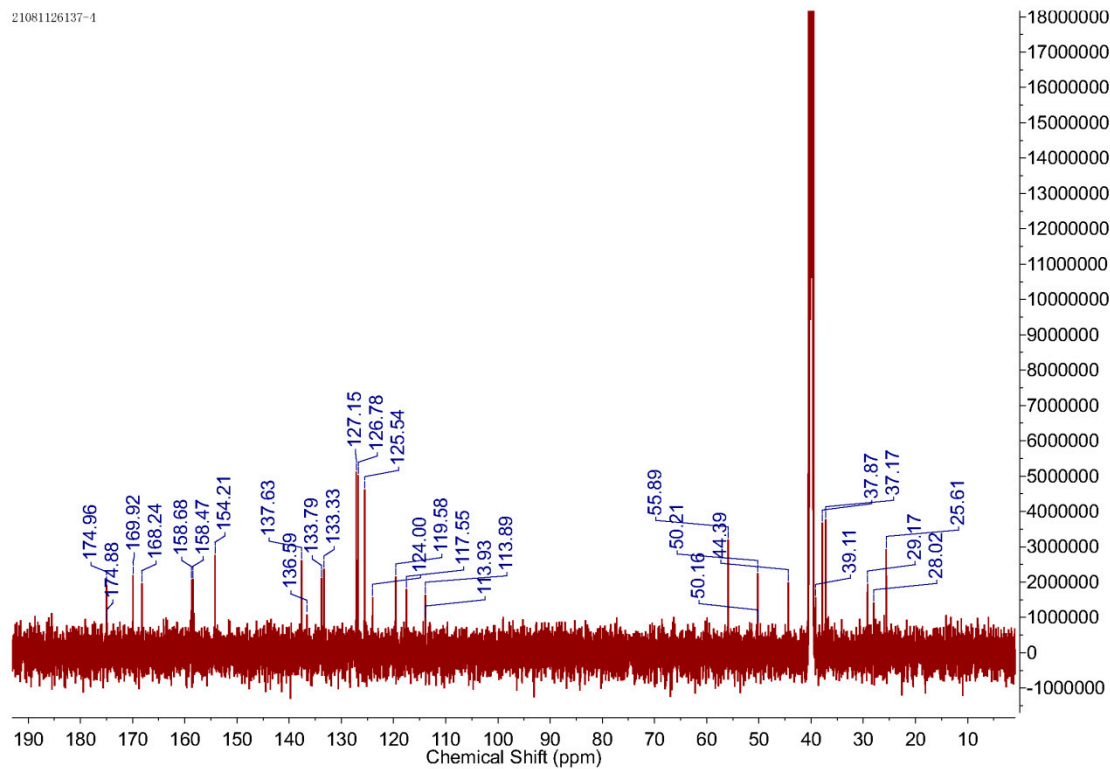

# CA6-a

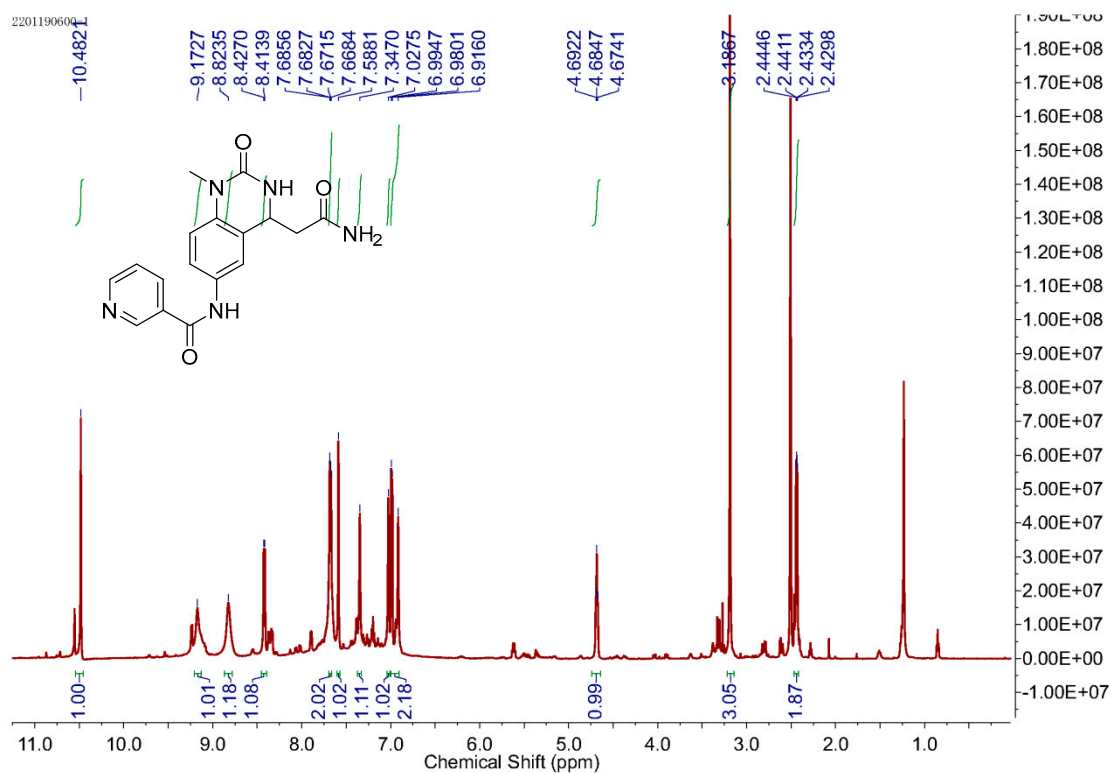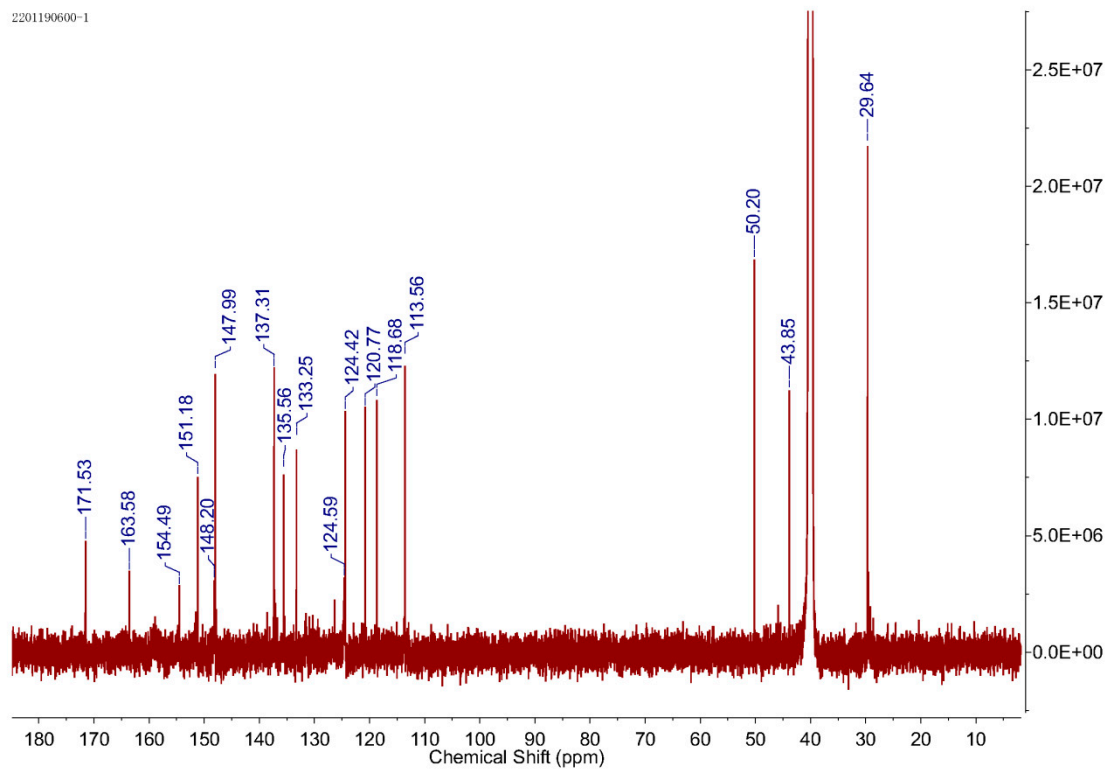

# CA6-b

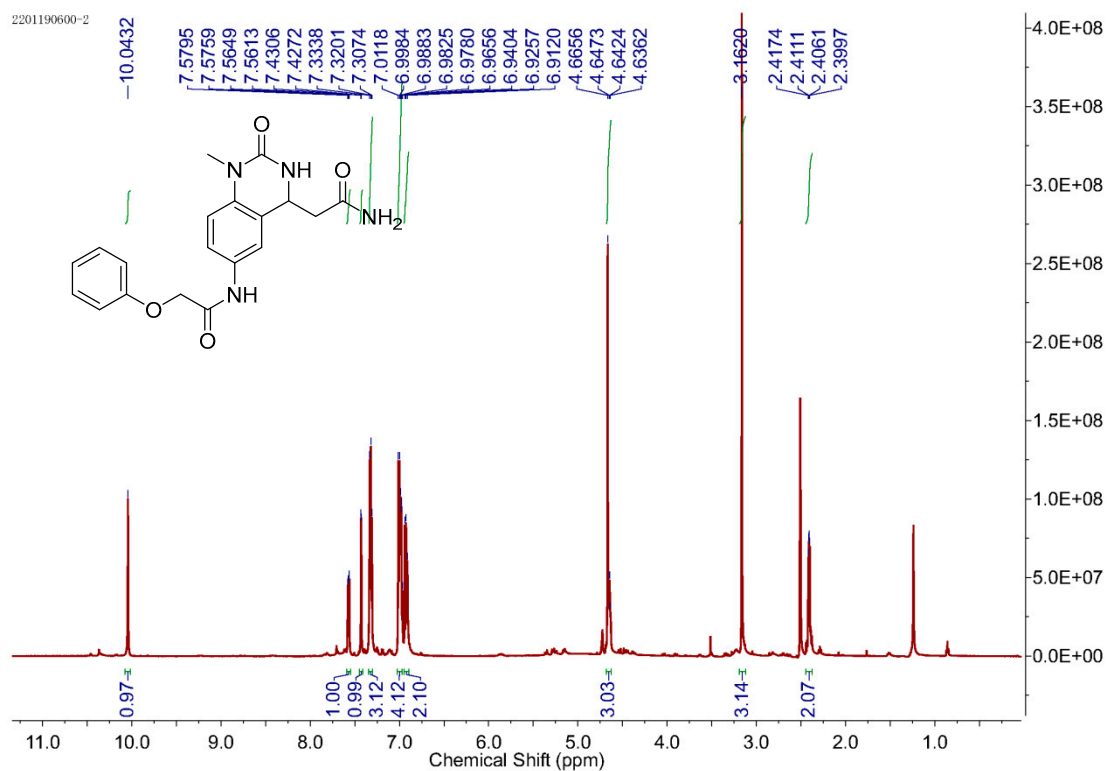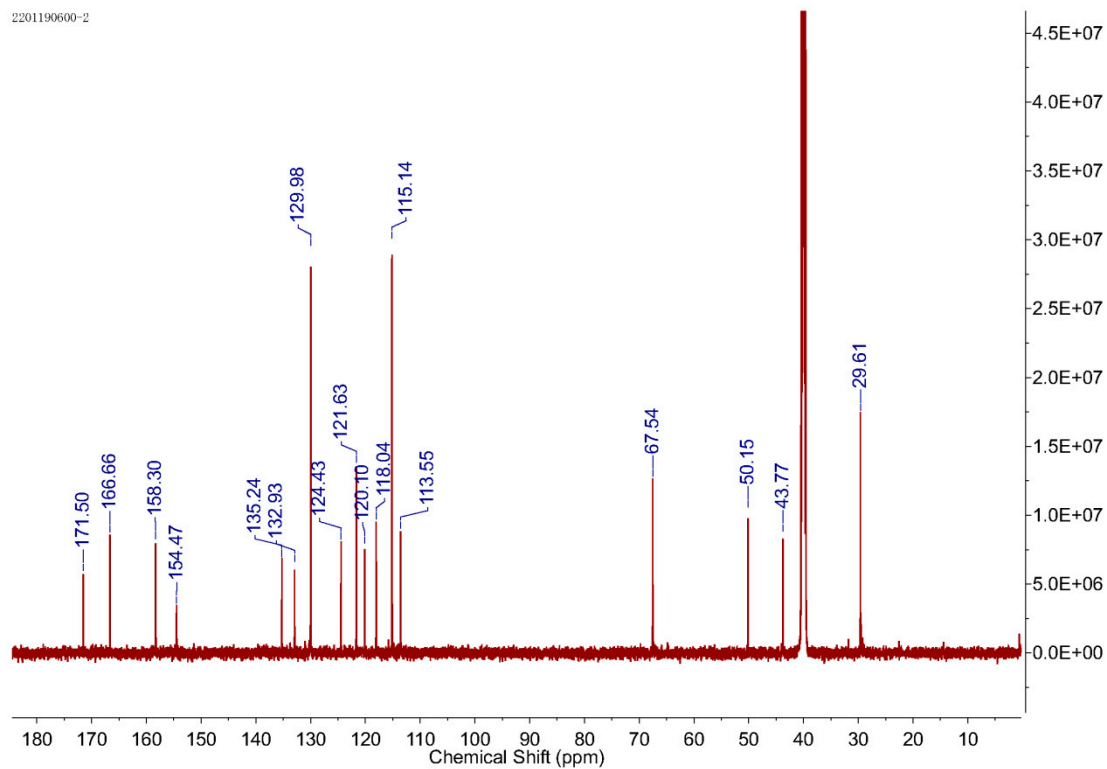

# CA7-a

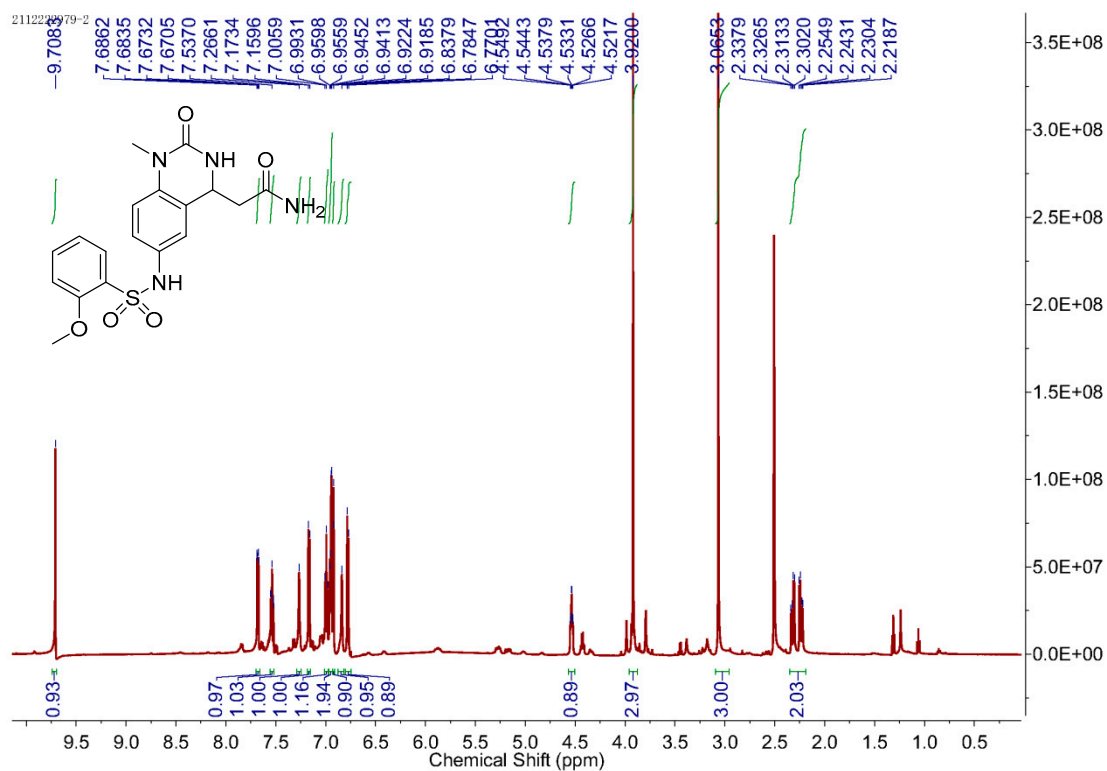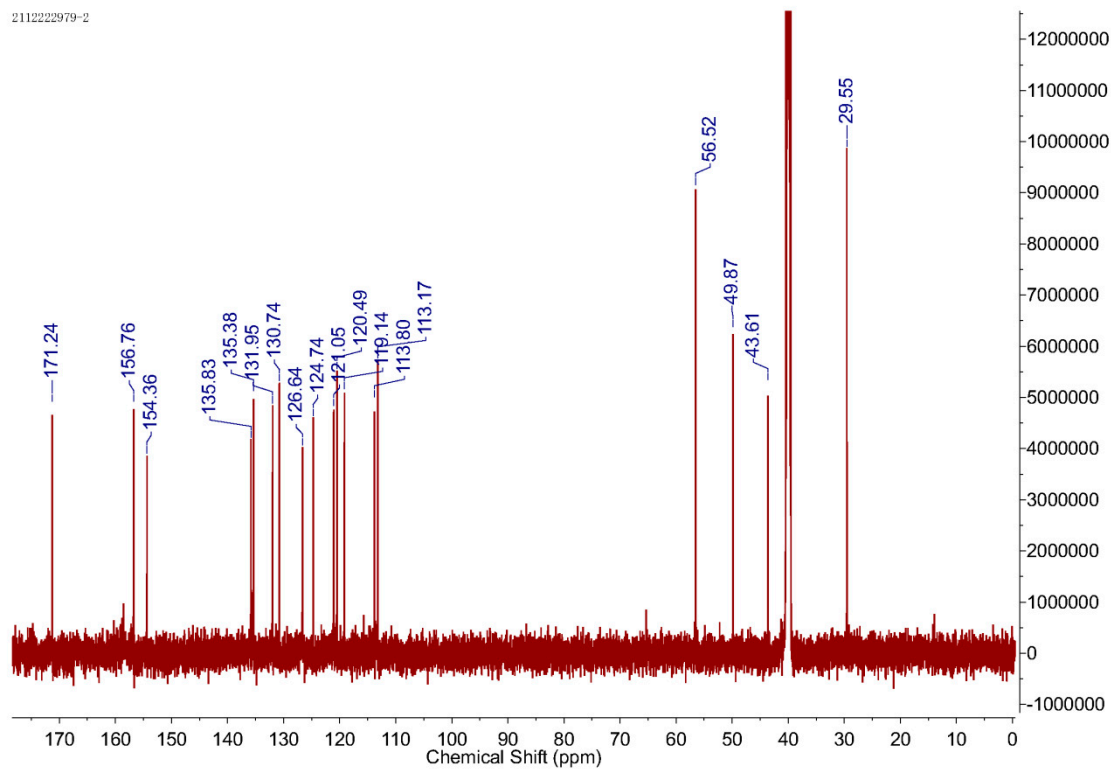

# CA7-b'

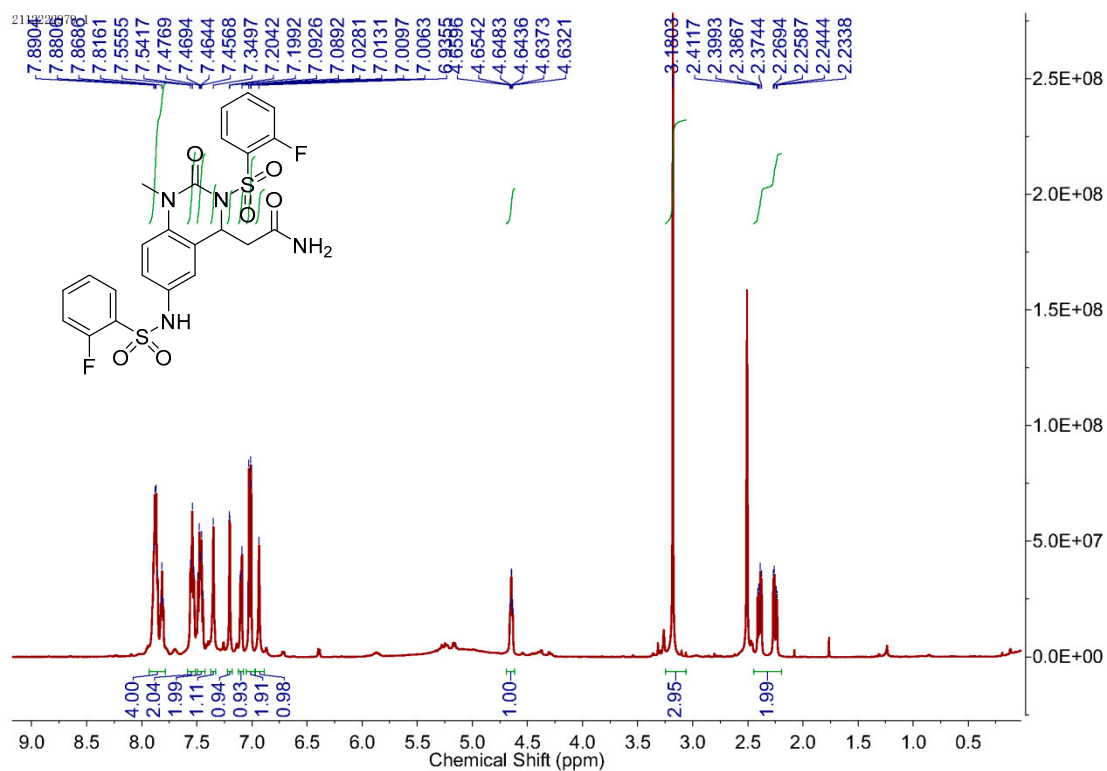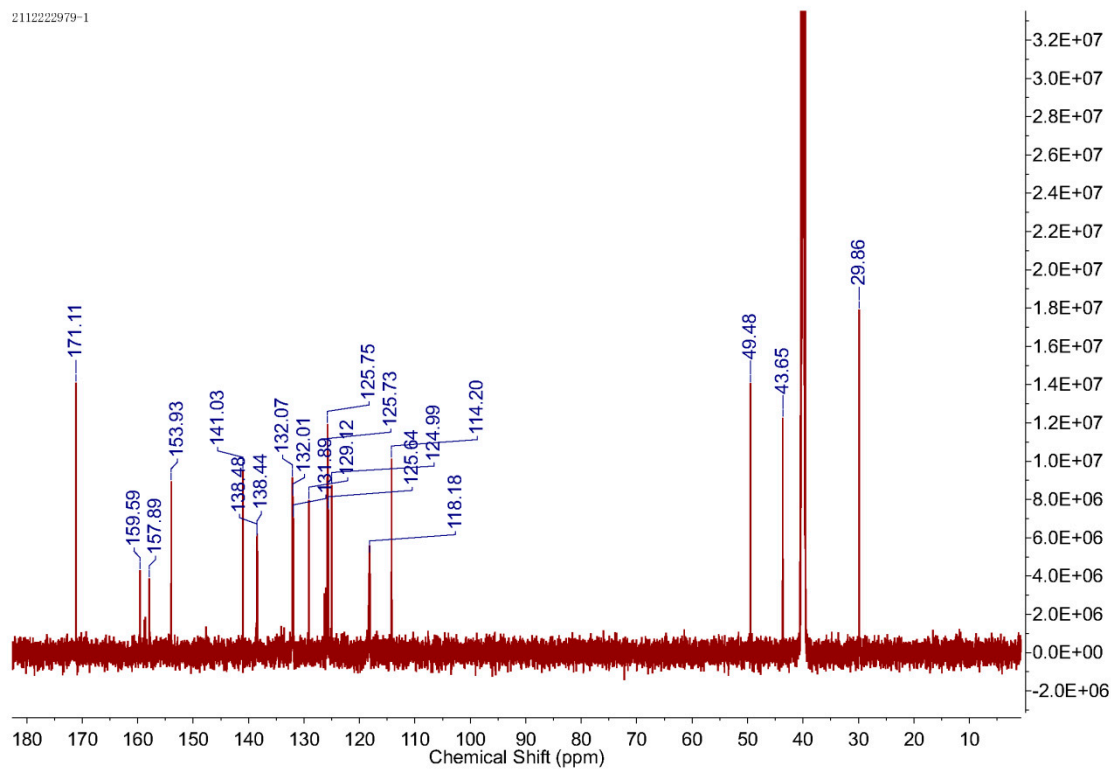

# LC/MS Spectrometry

## CA1-6

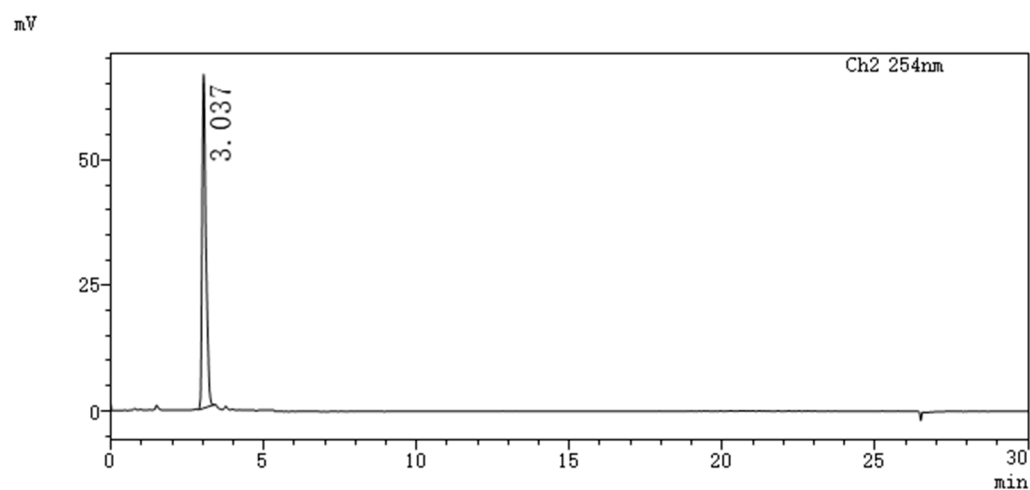

RT: 2.983 min (S#: 180)

Base peak: 395.15 (225870)

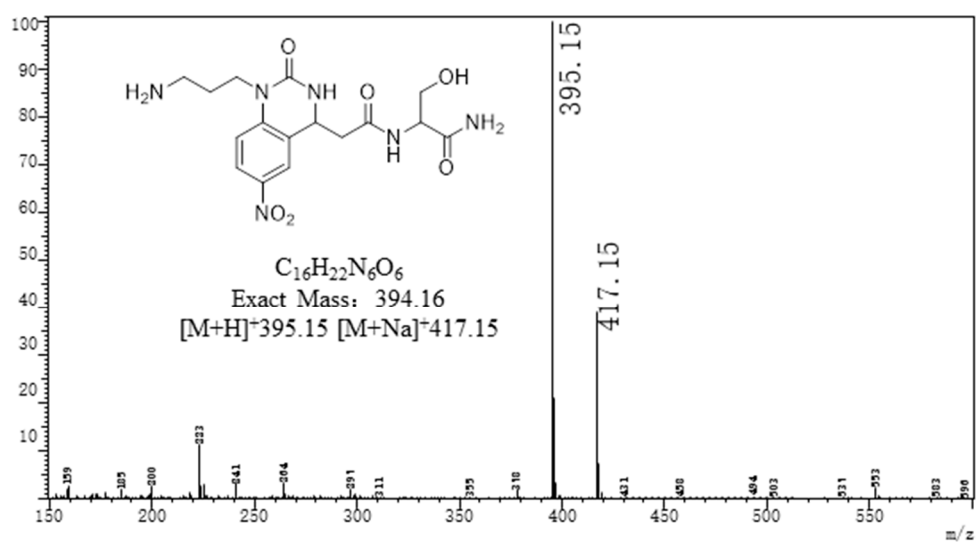

# CA1-7

mV

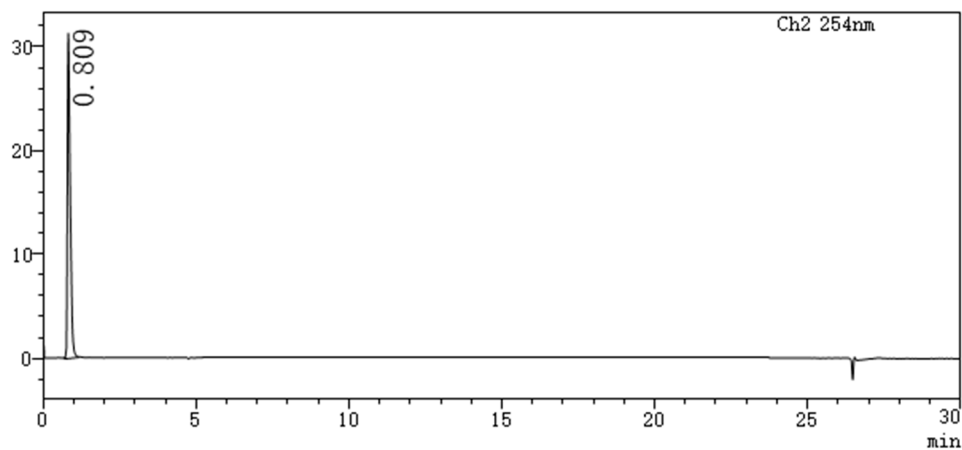

RT: 0.833 min (S#: 51)

Base peak: 365.20 (94449)

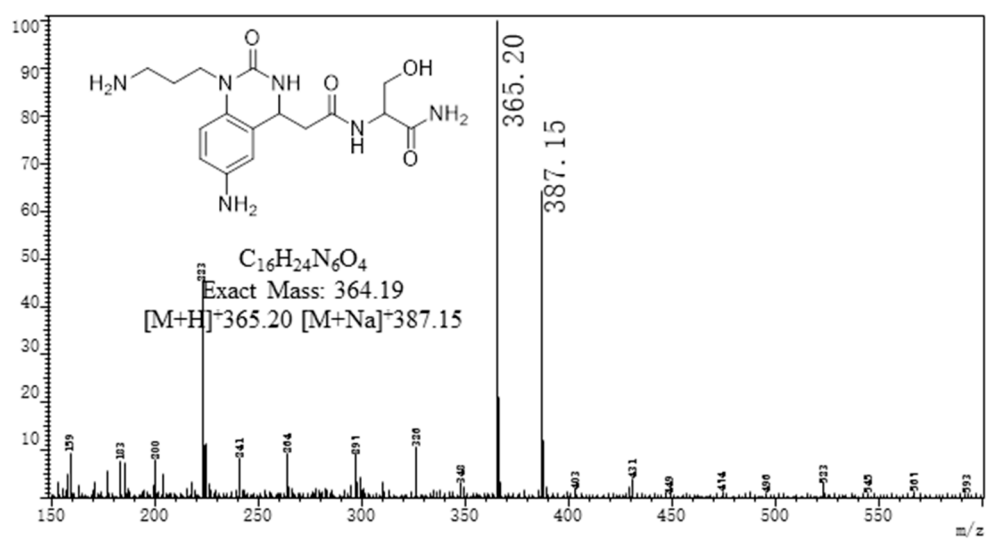



# CA1-a

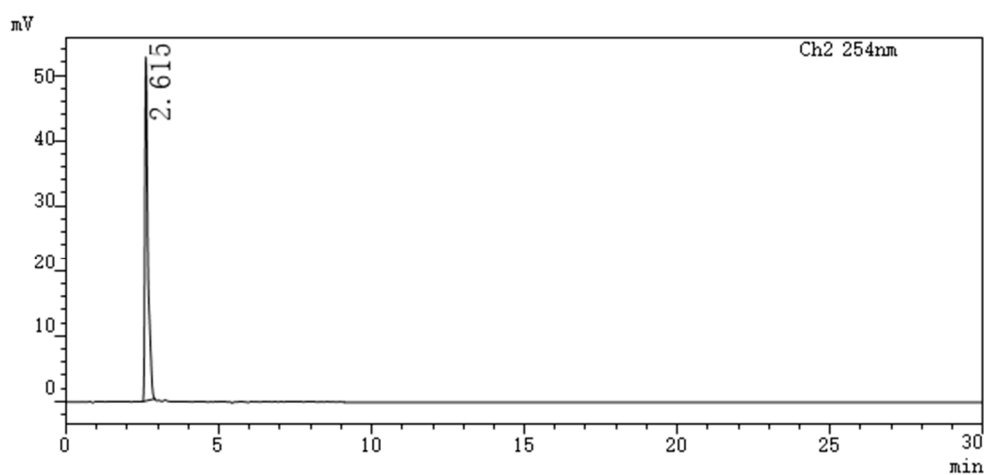

RT: 2.000 min (S#: 121)

Base peak: 492.15 (45287)

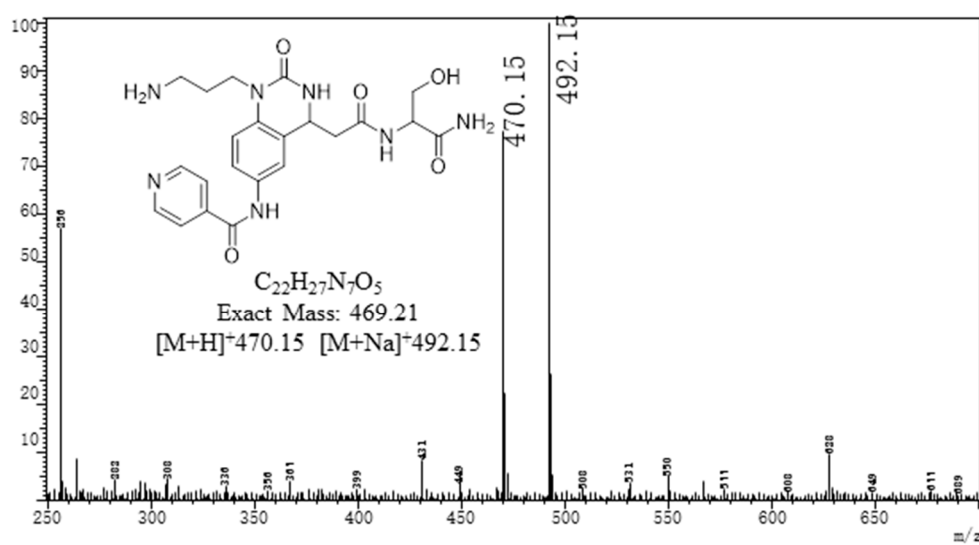

# CA1-b

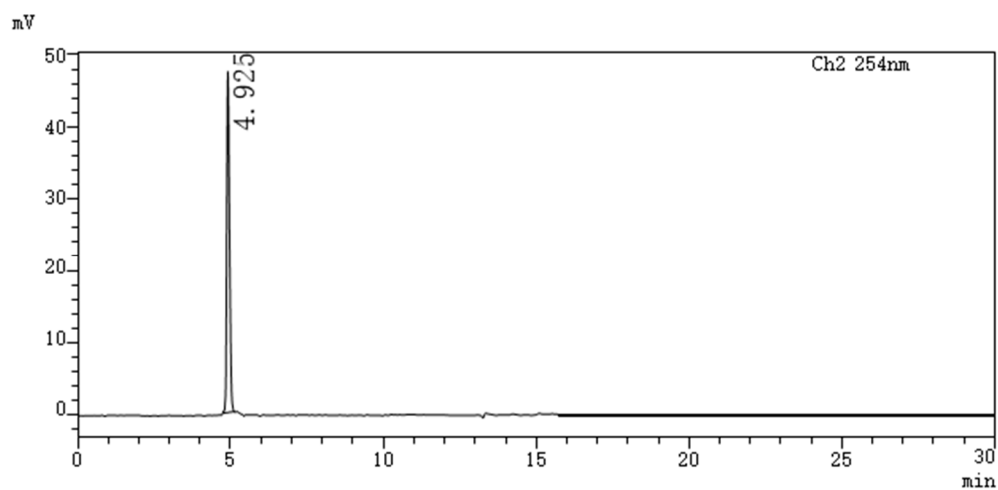

RT: 4.733 min (S#: 285)

Base peak: 469.20 (350588)

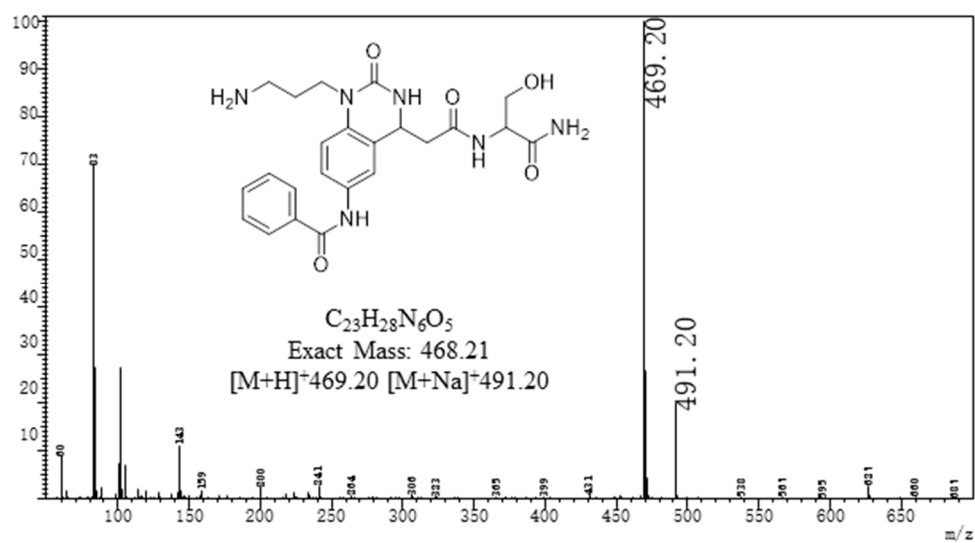

**CA1-c**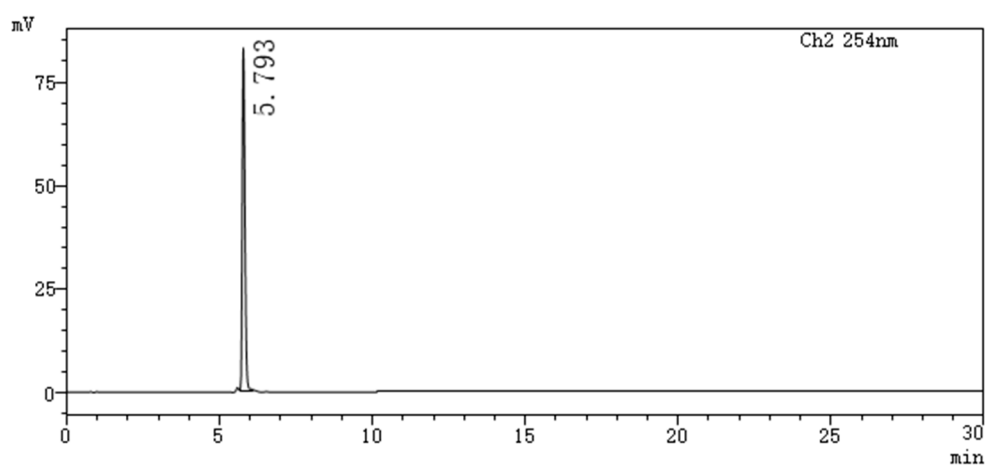

RT: 5.600 min (S#: 337)

Base peak: 483.20 (532953)

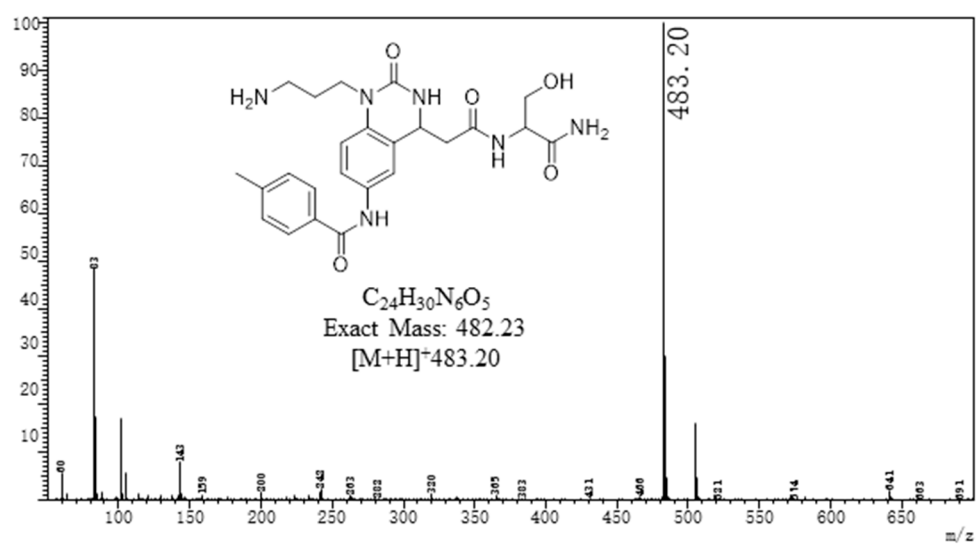

# CA1-d

mV

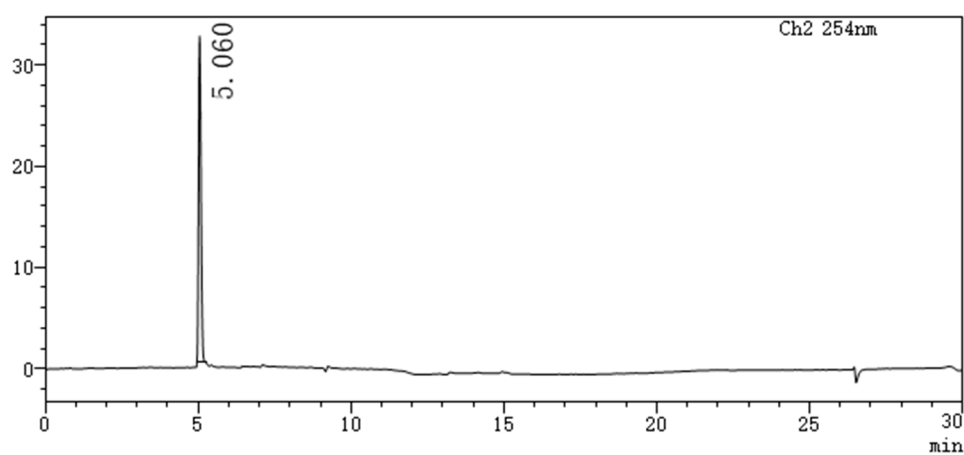

RT: 5.150 min (S#: 310)

Base peak: 487.20 (233021)

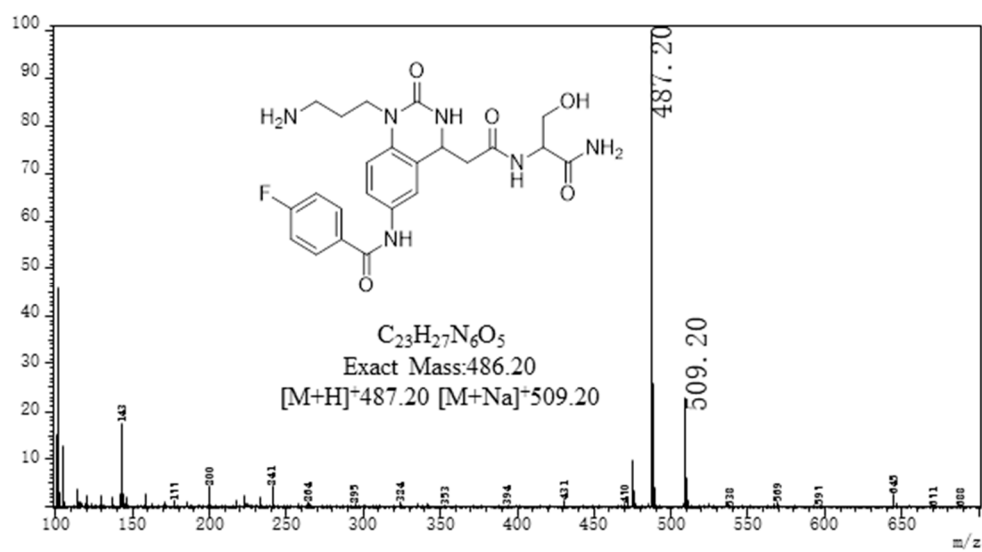

CA1-e

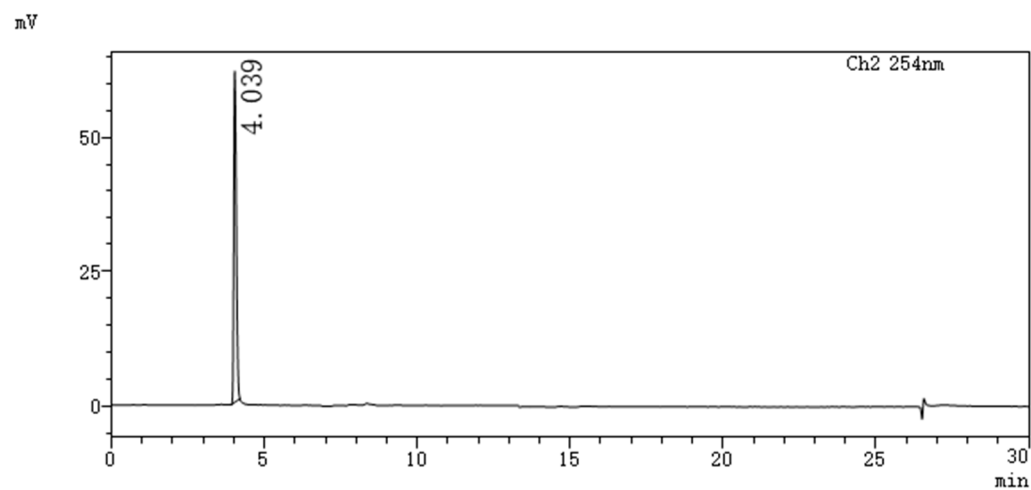

RT: 2.233 min (S#: 135)

Base peak: 470.20 (87027)

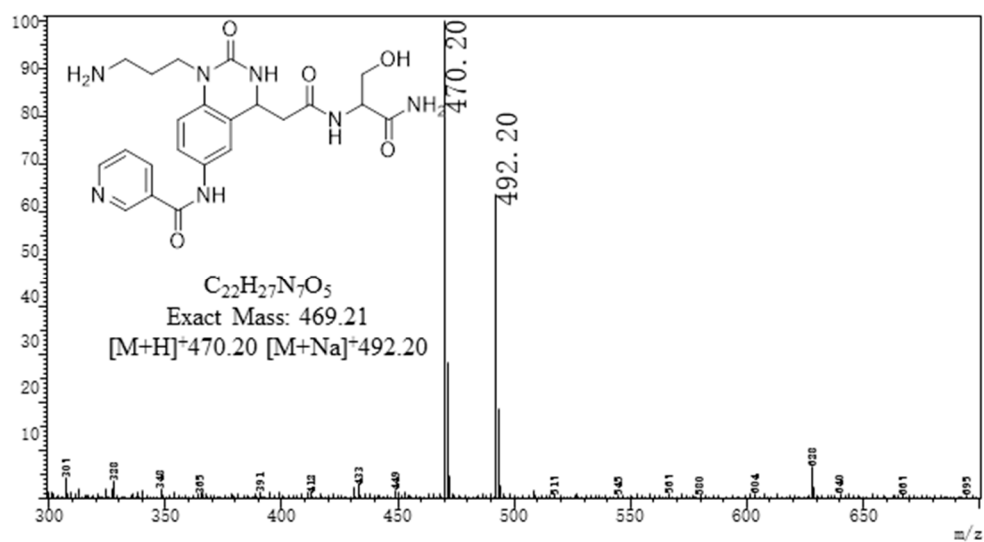

# CA1-f

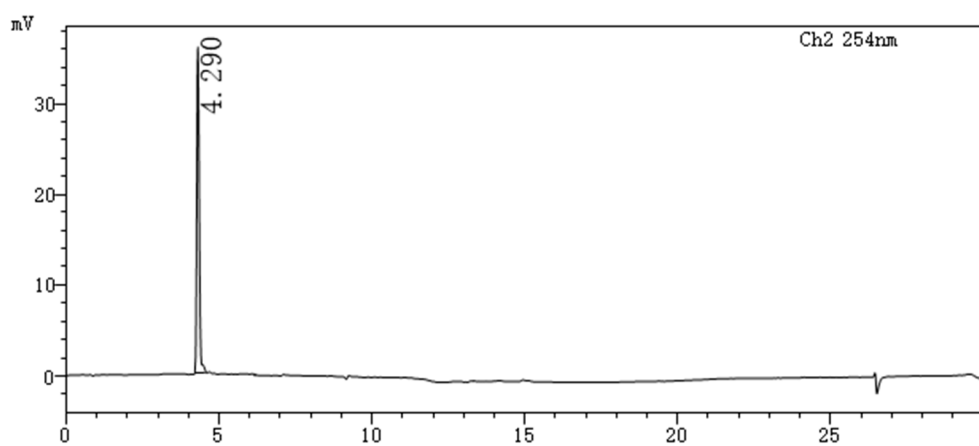

RT: 4.383 min (S#: 264)  
Base peak: 470.15 (76198)

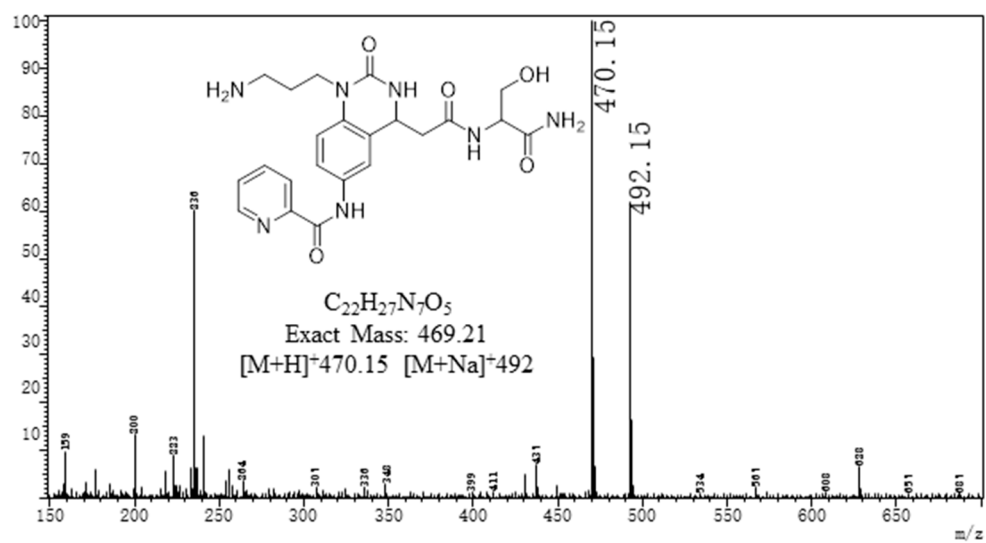

# CA1-g

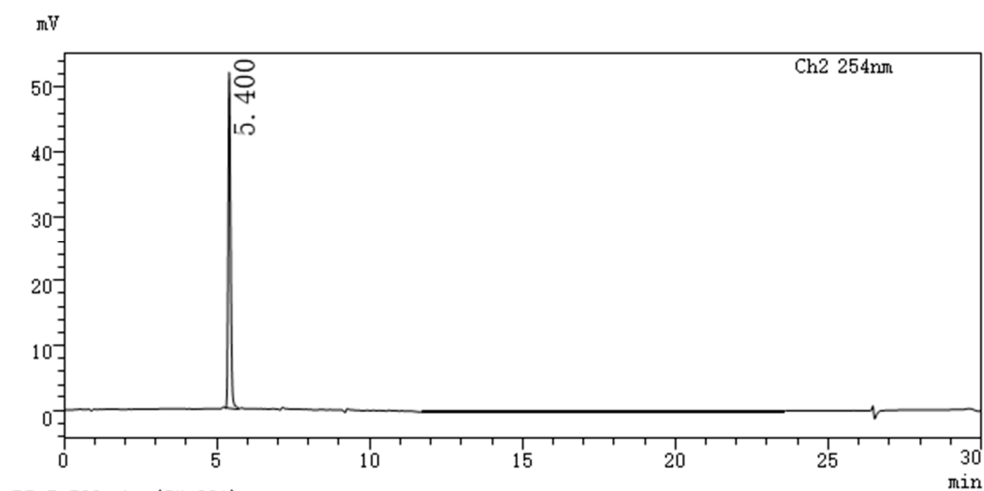

RT: 5.500 min (S#: 331)

Base peak: 499.20 (322733)

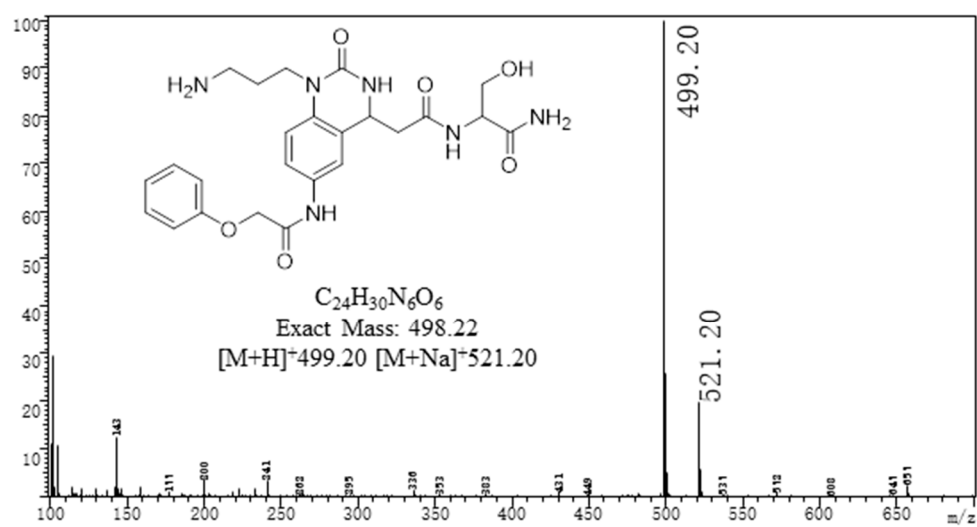

# CA1-h

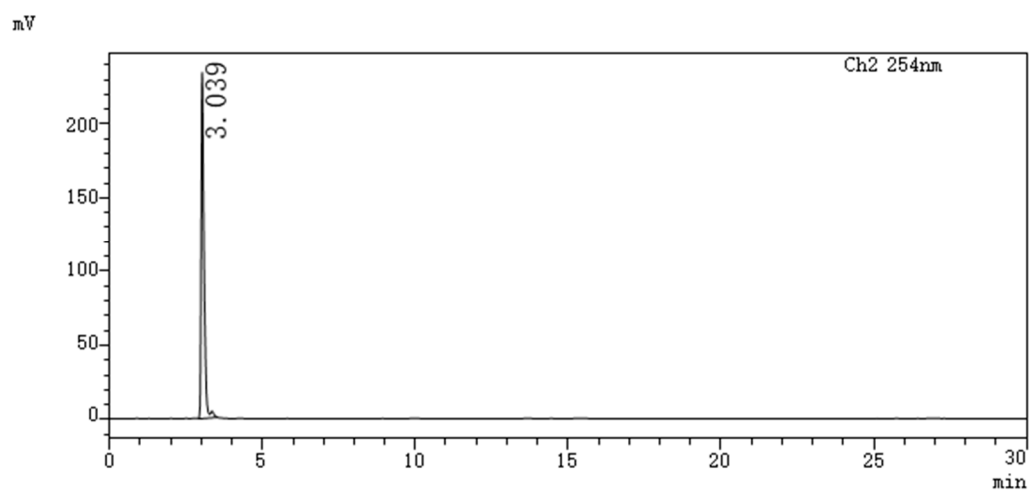

RT: 1.983 min (S#: 120)  
Base peak: 498.25 (238352)

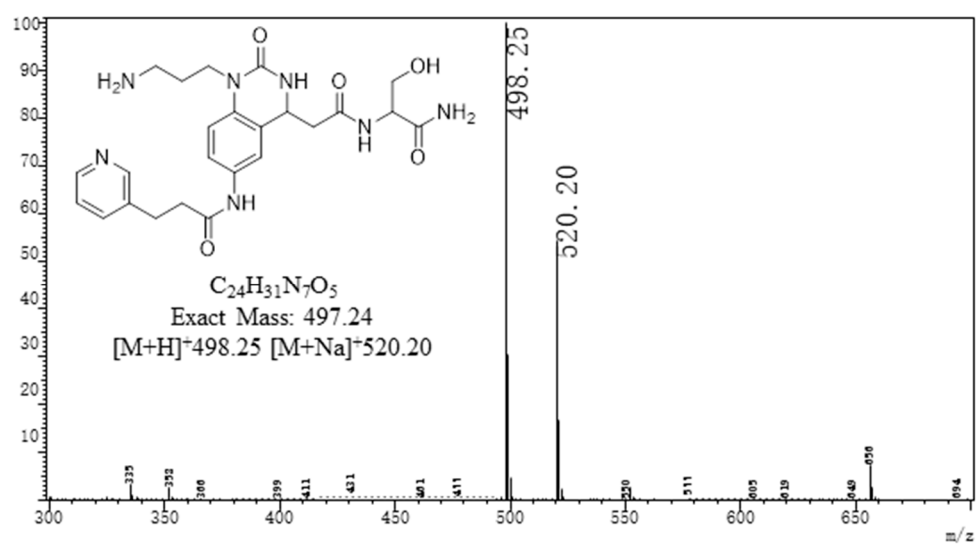



# CA1-i

mV

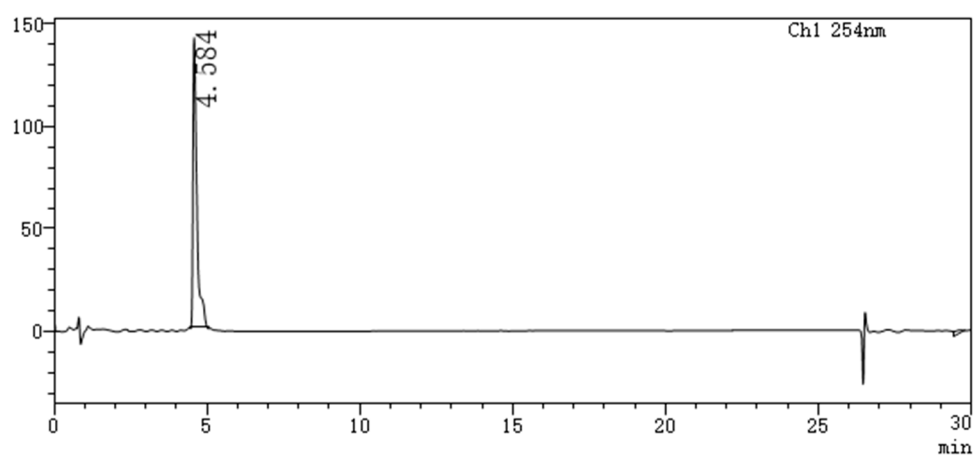

RT: 4.800 min (S#:289)

Base peak: 489.20 (161523)

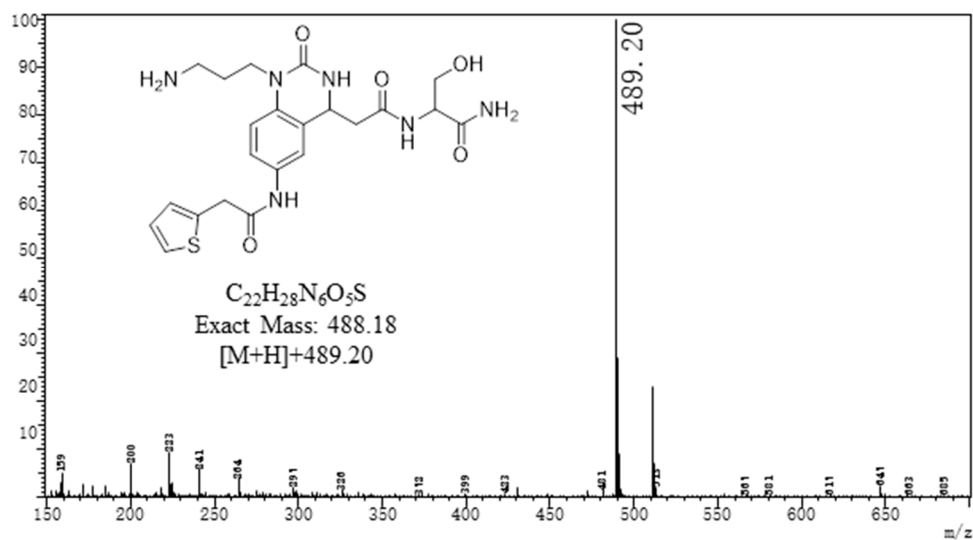

CA1-j

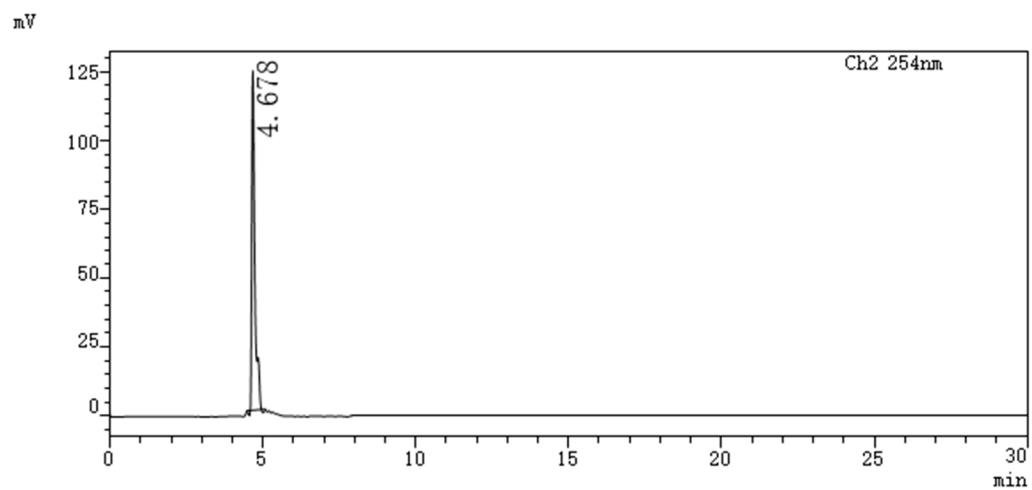

RT: 4.733 min (S#: 285)

Base peak: 535.20 (125733)

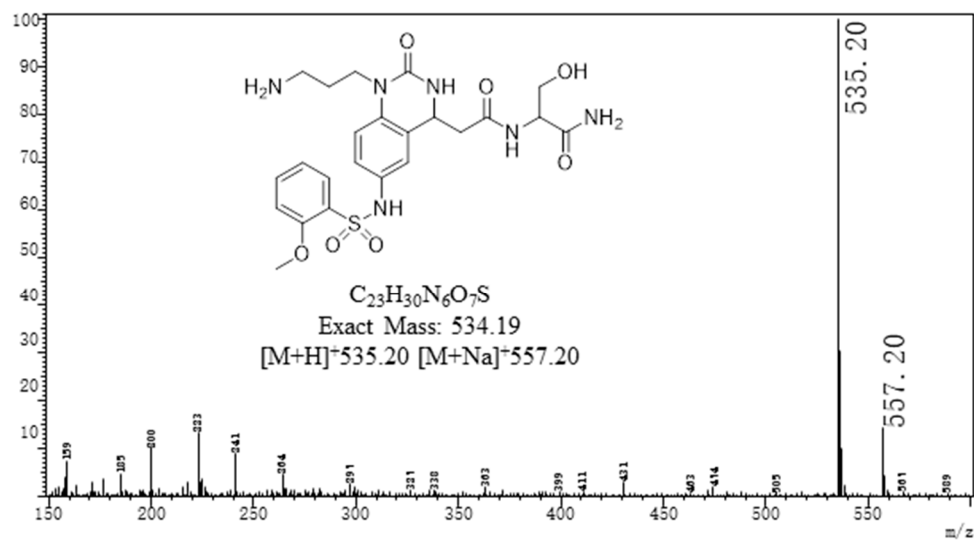

CA3

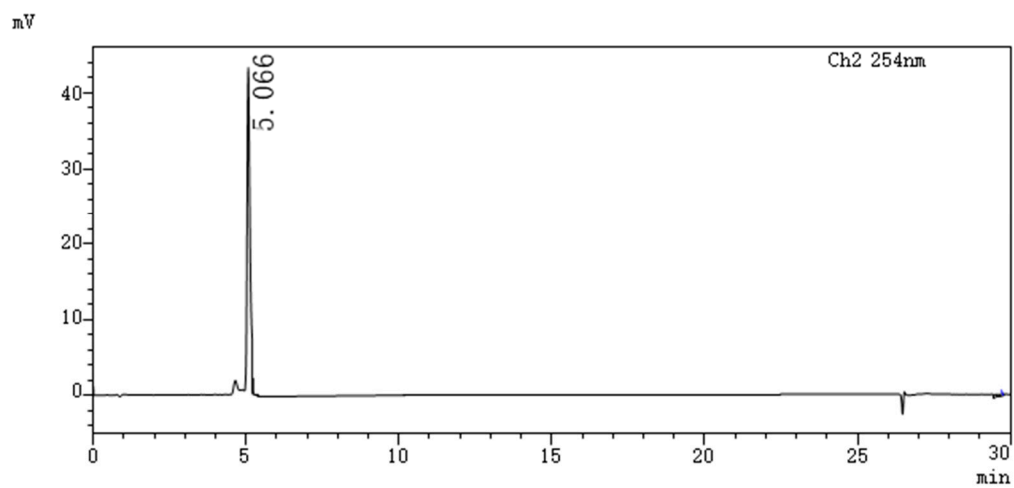

RT: 6.583 min (S#: 396)

Base peak: 538.30 (3551384)

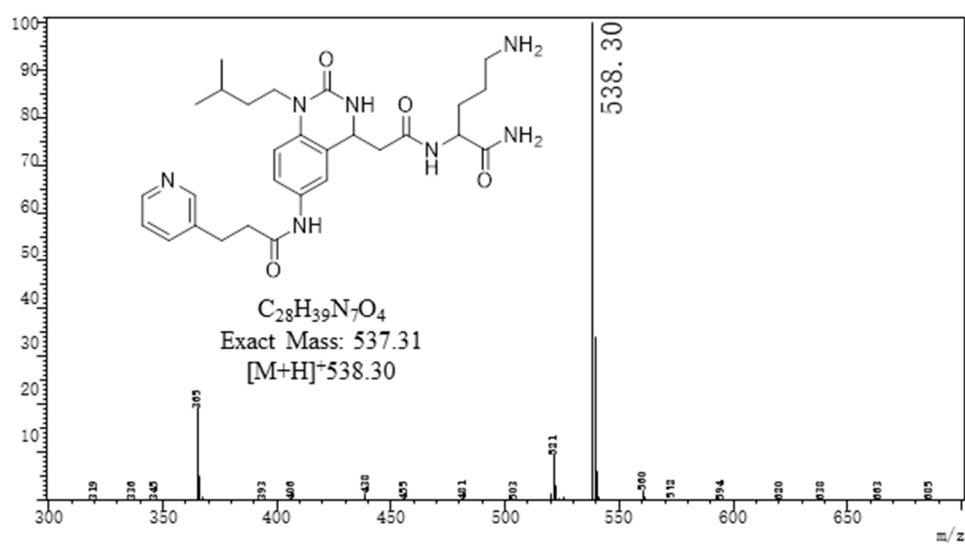

CA4

mV

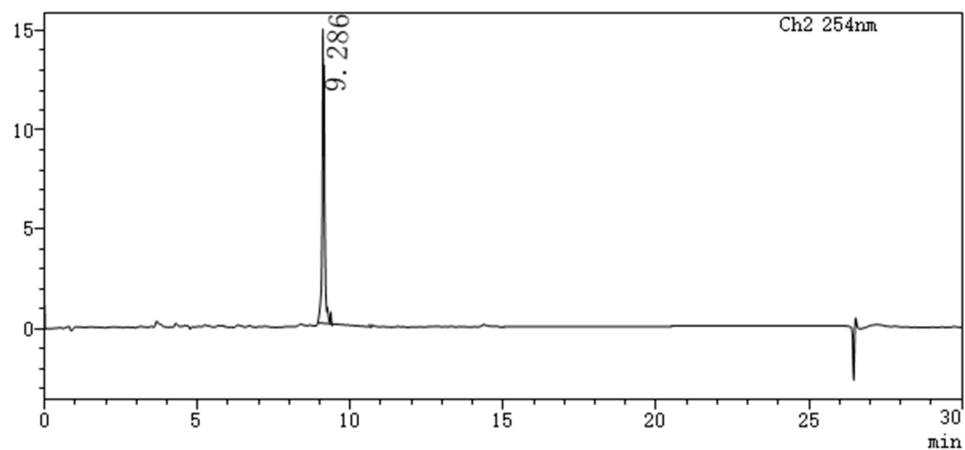

RT: 9.483 min (S#:570)

Base peak: 530.25 (28473)

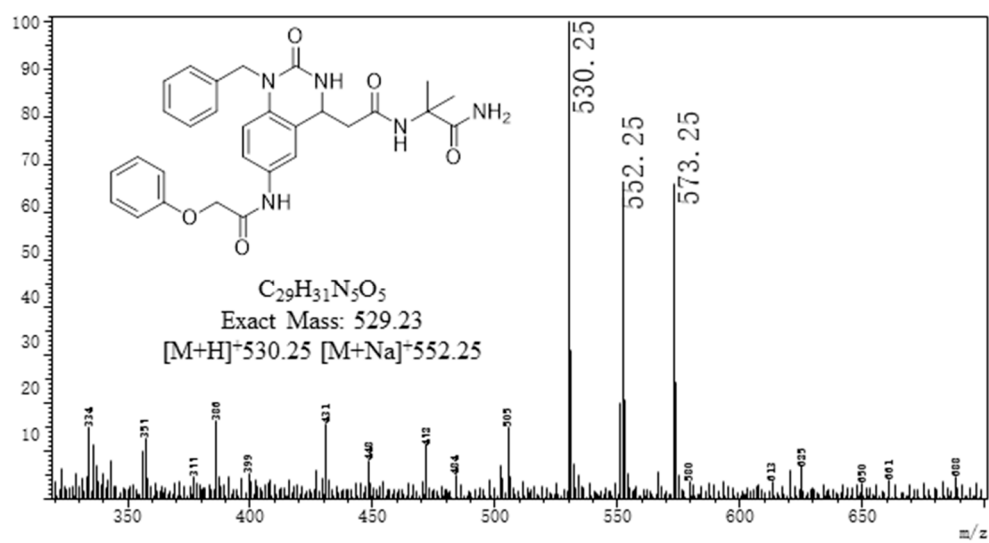

CA5

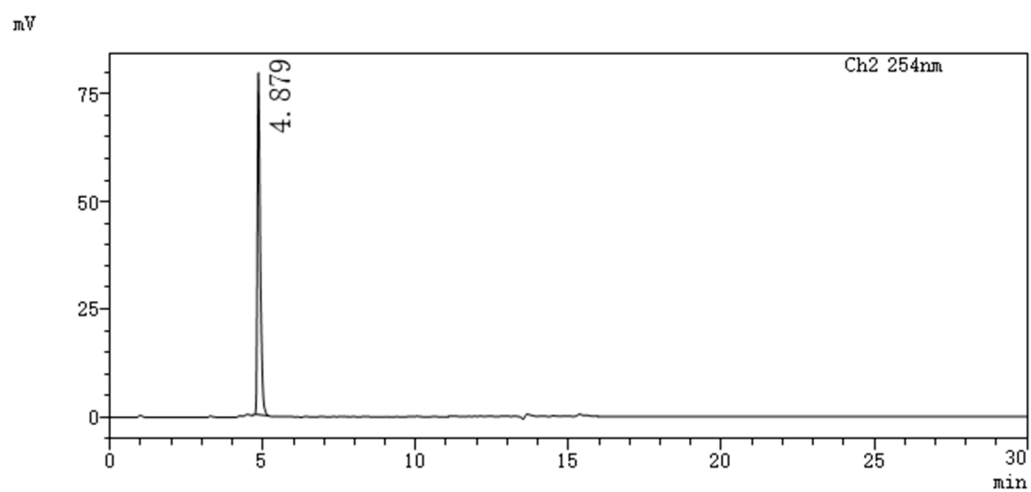

RT: 4.367 min (S#: 263)

Base peak: 528.20 (138703)

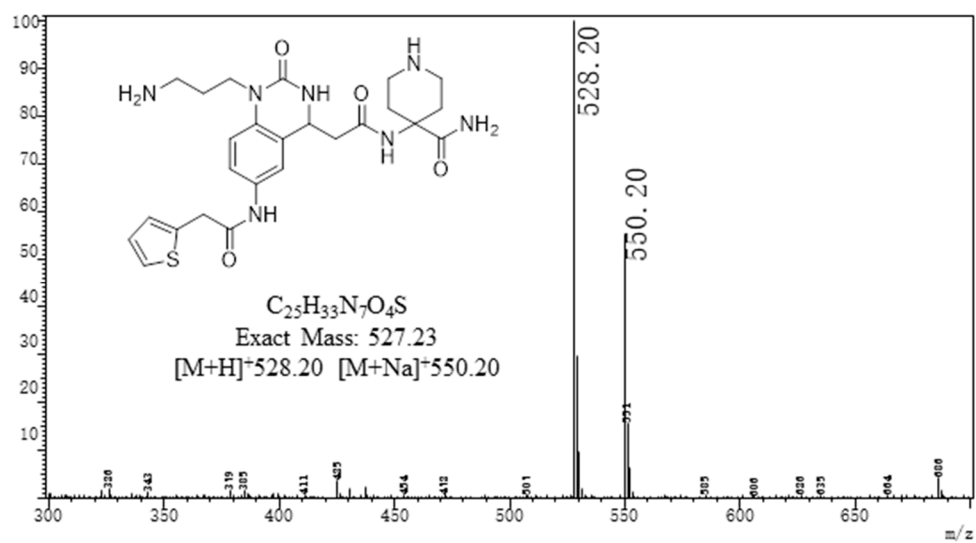

# CA6-a

mV

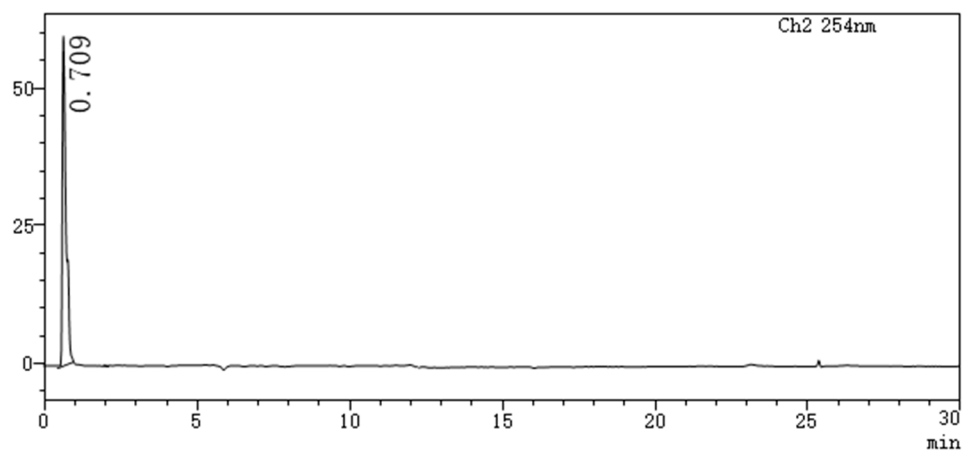

RT: 0.667 min (S#: 41)

Base peak: 340.15 (82566)

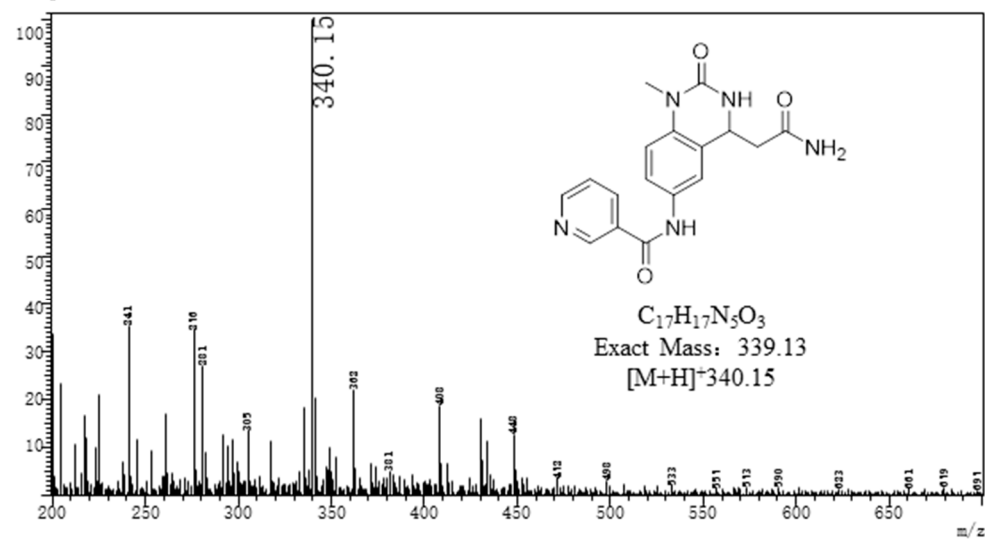

# CA6-b

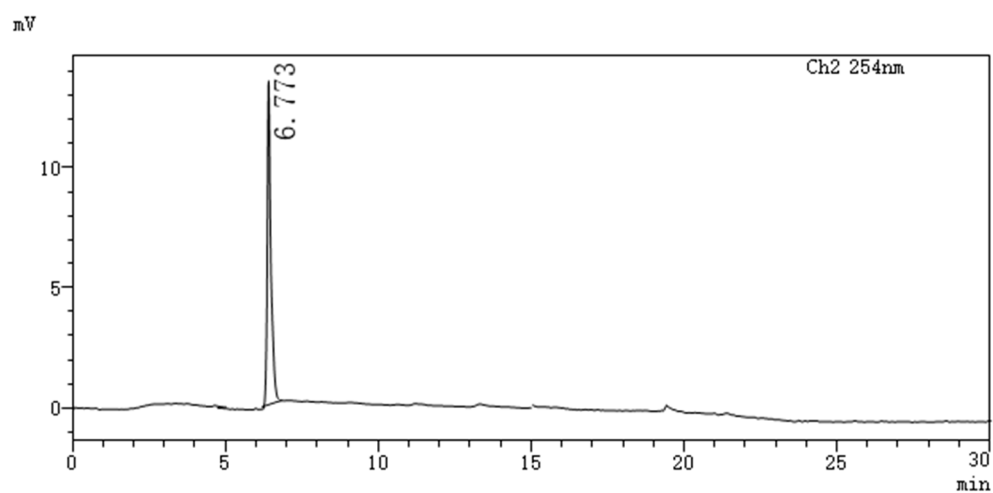

RT: 6.867 min (S#: 413)

Base peak: 369.15 (71969)

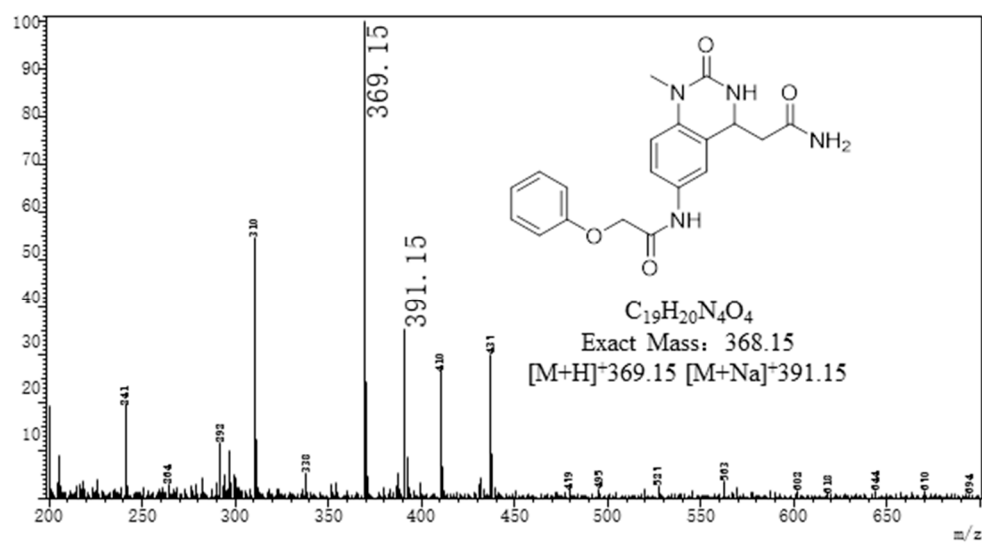

CA7-a

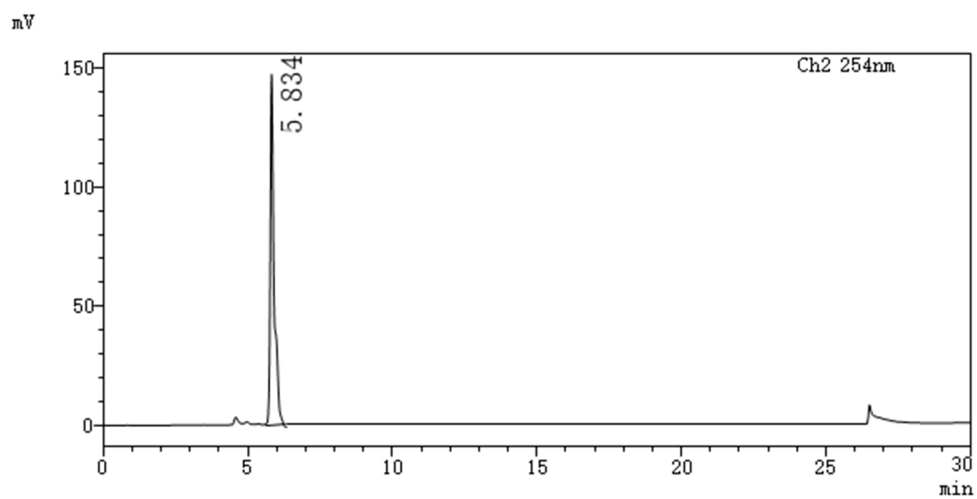

RT: 6.000 min (S#: 361)  
Base peak: 405.10 (204349)

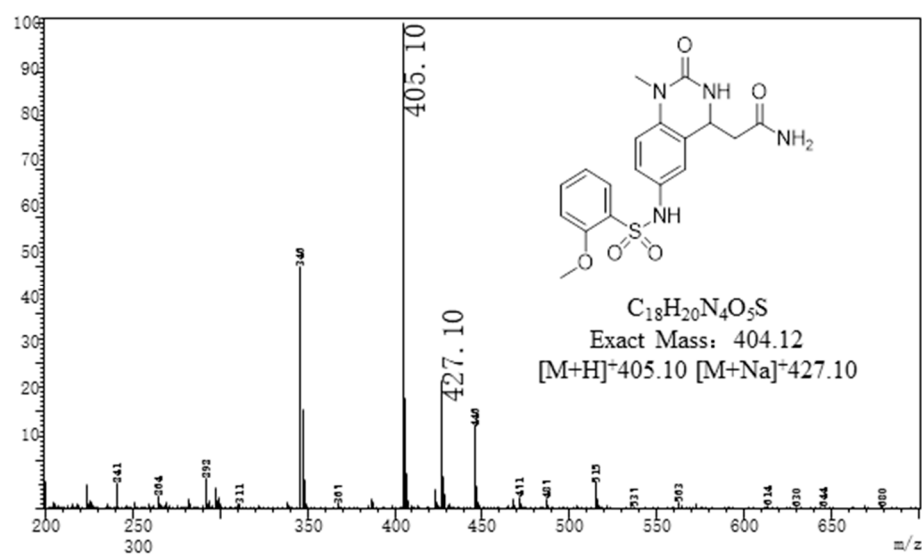



# CA7-b'

mV

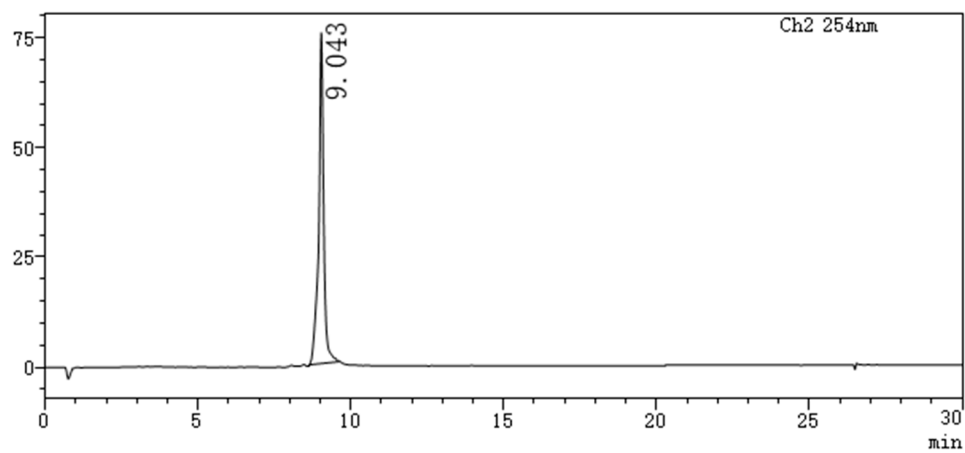

RT: 9.133 min (S#: 549)

Base peak: 551.10 (607196)

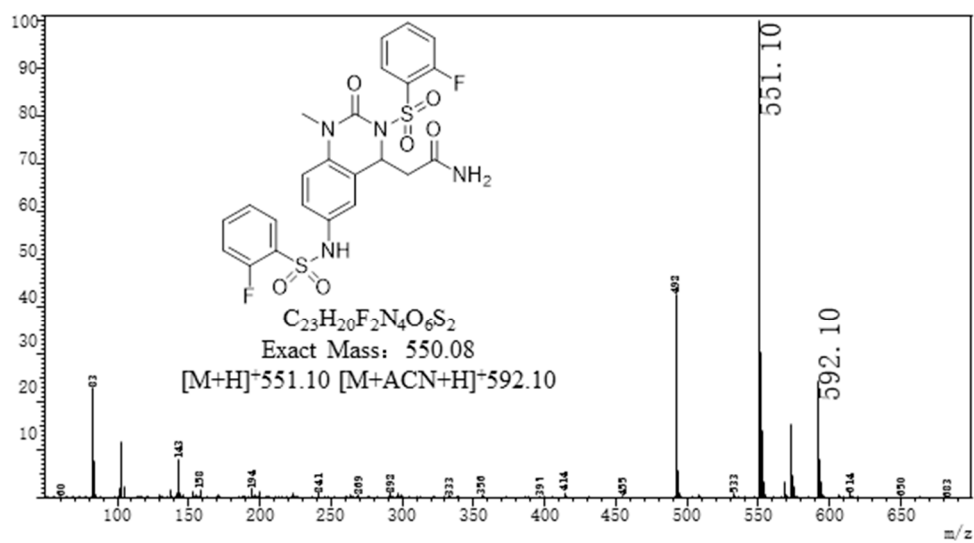

Supplement: s1 [file s1]
